# Supplementary material for: Population genomics of ancient and modern Trichuris trichiura
Source: PubMed Central journal article supplement (PMC9259628; doi:10.1038/s41467-022-31487-x), 2022-07-06
Supplement: 41467_2022_31487_MOESM3_ESM.pdf [file 41467_2022_31487_MOESM3_ESM.pdf]

## **Description of Additional Supplementary Files**

File Name: Supplementary Data 1

Description: Sample metadata and sequencing accession numbers.

File Name: Supplementary Data 2

Description: Genome mapping data by sample, including nuclear and mitochondrial genome coverage, and deamination statistics.

File Name: Supplementary Data 3

Description: Description of genes in regions of high genetic differentiation between samples from China and Uganda.

File Name: Supplementary Data 4

Description: Description of genes in regions of high genetic differentiation between samples from Uganda and Honduras.

File Name: Supplementary Data 5

Description: Description of genes in regions of high genetic differentiation between samples from China and Honduras.

File Name: Supplementary Data 6

Description: Description of genes in regions of high genetic differentiation between samples from Baboons and Uganda.
