# Supplementary material for: Population genomics of ancient and modern Trichuris trichiura
Source: Nat Commun. 2022 Jul 6;13:3888. doi: 10.1038/s41467-022-31487-x (PMC9259628; doi:10.1038/s41467-022-31487-x)
Supplement: Supplementary file 4 — Supplementary Data 1 [file 41467_2022_31487_MOESM4_ESM.xlsx]

## Sheet: Sheet1
SAMPLE_ID	SANGER_SAMPLE_ID	ENA_SAMPLE_ACCESSION	ORIGINAL_SAMPLE_ID_1	ORIGINAL_SAMPLE_ID_2	ORIGINAL_SAMPLE_ID_2	SEQUENCING	AGE	AGE_DETAIL	AGE_ID	COUNTRY	COUNTRY_ID	REGION	REGION_ID	SOURCE	SOURCE_DETAIL	SOURCE_ID	SAMPLE_NUMBER
AN_DNK_COA_EN_001	6432STDY10168234	ERS6157103	KUK_PSK7_MJS180A_GACACT_L007	MJS180A	KBM 3974 - PM10531 (SD10275)	single-end	1680 AD	Latrine	AN	Denmark	DNK	Copenhagen, Adelgade 12	COA	environment	environment	EN	001
AN_DNK_COA_EN_002	6432STDY10168235	ERS6157104	KUK_QFD4_MJS180B_TGTCTG_L002	MJS180B	KBM 3974 - PM10531 (SD10275)	single-end	1680 AD	Latrine	AN	Denmark	DNK	Copenhagen, Adelgade 12	COA	environment	environment	EN	002
AN_DNK_COG_EN_001	6432STDY10168236	ERS6157105	KUK_PSK7_MJS110A_ACATAC_L007	MJS110A	GSA	single-end	1600s AD	Deposit	AN	Denmark	DNK	Copenhagen, Gammel Strand	COG	environment	environment	EN	001
AN_DNK_COG_EN_002	6432STDY10168237	ERS6157107	KUK_QFD4_MJS110B_GACACT_L002	MJS110B	GSA	single-end	1600s AD	Deposit	AN	Denmark	DNK	Copenhagen, Gammel Strand	COG	environment	environment	EN	002
AN_DNK_COG_EN_003	6432STDY10168238	ERS6157109	KUK_PSK7_MJS111A_TGAGCC_L007	MJS111A	GSB	single-end	1600s AD	Deposit	AN	Denmark	DNK	Copenhagen, Gammel Strand	COG	environment	environment	EN	003
AN_DNK_COG_EN_004	6432STDY10168239	ERS6157110	KUK_QFD4_MJS111B_ACGCAT_L002	MJS111B	GSB	single-end	1600s AD	Deposit	AN	Denmark	DNK	Copenhagen, Gammel Strand	COG	environment	environment	EN	004
AN_DNK_COG_EN_005	6432STDY10168240	ERS6157112	KUK_PSK7_MJS113A_AGCATG_L007	MJS113A	GSB	single-end	1600s AD	Deposit	AN	Denmark	DNK	Copenhagen, Gammel Strand	COG	environment	environment	EN	005
AN_DNK_COG_EN_006	6432STDY10168241	ERS6157114	KUK_QFD4_MJS113B_GACCGG_L002	MJS113B	GSB	single-end	1600s AD	Deposit	AN	Denmark	DNK	Copenhagen, Gammel Strand	COG	environment	environment	EN	006
AN_DNK_COG_EN_007	6432STDY10168242	ERS6157116	KUK_PSK7_MJS114A_CGATGA_L007	MJS114A	GSB	single-end	1600s AD	Deposit	AN	Denmark	DNK	Copenhagen, Gammel Strand	COG	environment	environment	EN	007
AN_DNK_COG_EN_008	6432STDY10168243	ERS6157117	KUK_QFD4_MJS114B_GAGATA_L002	MJS114B	GSB	single-end	1600s AD	Deposit	AN	Denmark	DNK	Copenhagen, Gammel Strand	COG	environment	environment	EN	008
AN_DNK_COK_EN_001	6432STDY10168244	ERS6157119	KUK_PSK7_MJS151A_TAGATG_L007	MJS151A	KBM 3959 - PM1176 (SD1173)	single-end	1680 AD	Latrine	AN	Denmark	DNK	Copenhagen, Kultorvet	COK	environment	environment	EN	001
AN_DNK_COK_EN_002	6432STDY10168245	ERS6157121	KUK_QFD4_MJS151B_CTGACA_L002	MJS151B	KBM 3959 - PM1176 (SD1173)	single-end	1680 AD	Latrine	AN	Denmark	DNK	Copenhagen, Kultorvet	COK	environment	environment	EN	002
AN_DNK_COK_EN_003	6432STDY10168246	ERS6157123	KUK_PSK7_MJS152A_TGTGAC_L007	MJS152A	KBM 3959 - PM1176 (SD1173)	single-end	1680 AD	Latrine	AN	Denmark	DNK	Copenhagen, Kultorvet	COK	environment	environment	EN	003
AN_DNK_COK_EN_004	6432STDY10168247	ERS6157125	KUK_QFD4_MJS152B_TGCAGG_L002	MJS152B	KBM 3959 - PM1176 (SD1173)	single-end	1680 AD	Latrine	AN	Denmark	DNK	Copenhagen, Kultorvet	COK	environment	environment	EN	004
AN_DNK_OBM_EN_001	6432STDY10168248	ERS6157126	KUK_PSK7_MJS176A_TGCATA_L007	MJS176A	x2172 lag 991	single-end	1375-1400 AD	Latrine	AN	Denmark	DNK	Odense By Midte	OBM	environment	environment	EN	001
AN_DNK_OBM_EN_002	6432STDY10168249	ERS6157154	KUK_QFD4_MJS176B_ACTGCC_L002	MJS176B	x2172 lag 991	single-end	1375-1400 AD	Latrine	AN	Denmark	DNK	Odense By Midte	OBM	environment	environment	EN	002
AN_DNK_OBM_EN_003	6432STDY10168250	ERS6157156	KUK_PSK7_MJS177A_TCTCGC_L007	MJS177A	x2172 lag 991	single-end	1375-1400 AD	Latrine	AN	Denmark	DNK	Odense By Midte	OBM	environment	environment	EN	003
AN_DNK_OBM_EN_004	6432STDY10168251	ERS6157158	KUK_QFD4_MJS177B_GCAACG_L002	MJS177B	x2172 lag 991	single-end	1375-1400 AD	Latrine	AN	Denmark	DNK	Odense By Midte	OBM	environment	environment	EN	004
AN_DNK_OBM_EN_005	6432STDY10168252	ERS6157160	KUK_PSK7_MJS178A_TGATGC_L007	MJS178A	x2219 lag 973	single-end	1375-1400 AD	Latrine	AN	Denmark	DNK	Odense By Midte	OBM	environment	environment	EN	005
AN_DNK_OBM_EN_006	6432STDY10168253	ERS6157162	KUK_QFD4_MJS178B_CGACCT_L002	MJS178B	x2219 lag 973	single-end	1375-1400 AD	Latrine	AN	Denmark	DNK	Odense By Midte	OBM	environment	environment	EN	006
AN_DNK_OBM_EN_007	6432STDY10168254	ERS6157163	KUK_PSK7_MJS179A_GACGAC_L007	MJS179A	x2219 lag 973	single-end	1375-1400 AD	Latrine	AN	Denmark	DNK	Odense By Midte	OBM	environment	environment	EN	007
AN_DNK_OBM_EN_008	6432STDY10168255	ERS6157166	KUK_QFD4_MJS179B_TGACGT_L002	MJS179B	x2219 lag 973	single-end	1375-1400 AD	Latrine	AN	Denmark	DNK	Odense By Midte	OBM	environment	environment	EN	008
AN_DNK_VIB_EN_001	6432STDY10168256	ERS6157168	KUK_CTKJ_MSOE43_ACGTGC_L001	MSOE43	BOT198	single-end	1018-1030 AD	Deposit	AN	Denmark	DNK	Viborg	VIB	environment	environment	EN	001
AN_DNK_VIB_EN_002	6432STDY10168257	ERS6157170	KUK_CTKJ_MSOE44_TGATCC_L001	MSOE44	BOT198	single-end	1018-1030 AD	Deposit	AN	Denmark	DNK	Viborg	VIB	environment	environment	EN	002
AN_DNK_VIB_EN_003	6432STDY10168258	ERS6157172	KUK_CTKJ_MSOE45_CTCTAG_L001	MSOE45	ZOO265	single-end	1018-1030 AD	Latrine	AN	Denmark	DNK	Viborg	VIB	environment	environment	EN	003
AN_DNK_VIB_EN_004	6432STDY10168259	ERS6157174	KUK_CTKJ_MSOE46B_GAGAAG_L001	MSOE46B	ZOO265	single-end	1018-1030 AD	Latrine	AN	Denmark	DNK	Viborg	VIB	environment	environment	EN	004
AN_DNK_VIB_EN_005	6432STDY10168260	ERS6157175	KUK_CTKJ_MSOE46C_CACGAA_L001	MSOE46C	ZOO265	single-end	1018-1030 AD	Latrine	AN	Denmark	DNK	Viborg	VIB	environment	environment	EN	005
AN_LTU_VIL_EN_001	6432STDY10168261	ERS6157178	KUK_PSK7_MJS199A_GAGAAG_L007	MJS199A	Boksto street, trench 1, layer 9, VLN-5	single-end	1550-1580 AD	Deposit	AN	Lithuania	LTU	Vilnius	VIL	environment	environment	EN	001
AN_LTU_VIL_EN_002	6432STDY10168262	ERS6157179	KUK_QFD4_MJS199B_CACGAA_L002	MJS199B	Boksto street, trench 1, layer 9, VLN-5	single-end	1550-1580 AD	Deposit	AN	Lithuania	LTU	Vilnius	VIL	environment	environment	EN	002
AN_NLD_KAM_EN_001	6432STDY10168263	ERS6157181	KUK_KKUM_MJS107A_ACGCAT_L006	MJS107A	Spoornummer 759	single-end	1350-1425 AD	Latrine	AN	Holland	NLD	Kampen, Spoornummer 759	KAM	environment	environment	EN	001
AN_NLD_KAM_EN_002	6432STDY10168264	ERS6157184	KUK_KKUM_MJS107B_GACCGG_L006	MJS107B	Spoornummer 759	single-end	1350-1425 AD	Latrine	AN	Holland	NLD	Kampen, Spoornummer 759	KAM	environment	environment	EN	002
AN_NLD_KAM_EN_003	6432STDY10168265	ERS6157186	KUK_KKUM_MJS108A_GAGATA_L006	MJS108A	Spoornummer 4044	single-end	1500-1850 AD	Latrine	AN	Holland	NLD	Kampen, Spoornummer 759	KAM	environment	environment	EN	003
AN_NLD_KAM_EN_004	6432STDY10168266	ERS6157188	KUK_KKUM_MJS108B_CTGACA_L006	MJS108B	Spoornummer 4044	single-end	1500-1850 AD	Latrine	AN	Holland	NLD	Kampen, Spoornummer 759	KAM	environment	environment	EN	004
AN_NLD_ZWO_EN_001	6432STDY10168267	ERS6157127	KUK_KKUM_MJS106B_GACACT_L006	MJS106B	Bit 14	single-end	1500-1850 AD	Latrine	AN	Holland	NLD	Zwolle, Bit 14	ZWO	environment	environment	EN	001
AN_NLD_ZWO_EN_002	6432STDY10168268	ERS6157128	KUK_KKUM_MJS106A_GACGAC_L006	MJS106A	Bit 14	single-end	1500-1850 AD	Latrine	AN	Holland	NLD	Zwolle, Bit 14	ZWO	environment	environment	EN	002
MN_CHN_GUA_HS_001	6432STDY10168269	ERS6157129	KUK_KNTA_MJS139_ACGTGC_L008	MJS139	H102_CH	paired-end	modern	modern	MN	China	CHN	Guangdong	GUA	Homo sapiens	HS_01	HS	001
MN_CHN_GUA_HS_002	6432STDY10168270	ERS6157131	KUK_KNTA_MJS140_TGATCC_L008	MJS140	H103_CH	paired-end	modern	modern	MN	China	CHN	Guangdong	GUA	Homo sapiens	HS_01	HS	002
MN_CHN_GUA_HS_003	6432STDY10168271	ERS6157132	KUK_KNTA_MJS142_GAGAAG_L008	MJS142	H105_CH	paired-end	modern	modern	MN	China	CHN	Guangdong	GUA	Homo sapiens	HS_02	HS	003
MN_CHN_GUA_HS_004	6432STDY10168272	ERS6157135	KUK_KNTA_MJS143_CACGAA_L008	MJS143	H106_CH	paired-end	modern	modern	MN	China	CHN	Guangdong	GUA	Homo sapiens	HS_03	HS	004
MN_CHN_GUA_HS_005	6432STDY10168273	ERS6157136	KUK_KNTA_MJS144_CATAGA_L008	MJS144	H107_CH	paired-end	modern	modern	MN	China	CHN	Guangdong	GUA	Homo sapiens	HS_03	HS	005
MN_CHN_GUA_HS_006	6432STDY10168274	ERS6157137	KUK_KNTA_MJS145_ACAGTC_L008	MJS145	H108_CH	paired-end	modern	modern	MN	China	CHN	Guangdong	GUA	Homo sapiens	HS_04	HS	006
MN_CHN_GUA_HS_007	6432STDY10168275	ERS6157138	KUK_KNTA_MJS146_CATCGT_L008	MJS146	H109_CH	paired-end	modern	modern	MN	China	CHN	Guangdong	GUA	Homo sapiens	HS_05	HS	007
MN_CHN_GUA_LM_008	6432STDY10168276	ERS6157139	KUK_KNTA_MJS147_TTGAAC_L008	MJS147	TH1_CH	paired-end	modern	modern	MN	China	CHN	Guangdong Zoo	GUA	Leaf monkey	LM_01	LM	008
MN_CHN_GUA_LM_009	6432STDY10168277	ERS6157140	KUK_KNTA_MJS148_ACATAC_L008	MJS148	TH2_CH	paired-end	modern	modern	MN	China	CHN	Guangdong Zoo	GUA	Leaf monkey	LM_02	LM	009
MN_CHN_GUA_LM_010	6432STDY10168278	ERS6157142	KUK_KNTA_MJS149_TGAGCC_L008	MJS149	TH4_CH	paired-end	modern	modern	MN	China	CHN	Guangdong Zoo	GUA	Leaf monkey	LM_03	LM	010
MN_CMR_DJA_HS_001	6432STDY10168279	ERS6157144	KUK_XJCM_MJS220_TGAGCC_L007	MJS220	DJA H112 - 3/9/14 ETOH	paired-end	modern	modern	MN	Cameroon	CMR	Dja Fauna Reserve	DJA	Homo sapiens	HS_01	HS	001
MN_CMR_DJA_HS_002	6432STDY10168280	ERS6157146	KUK_XJCM_MJS221_TGATGC_L007	MJS221	DJA H144 - 4/9/14 ETOH	paired-end	modern	modern	MN	Cameroon	CMR	Dja Fauna Reserve	DJA	Homo sapiens	HS_02	HS	002
MN_CMR_UNK_HS_003	6432STDY10168281	ERS6157148	KUK_XJCM_MJS227_ACGTGC_L007	MJS227	22	paired-end	modern	modern	MN	Cameroon	CMR	Bekatako-Balue	UNK	Homo sapiens	HS_03	HS	003
MN_CMR_UNK_HS_004	6432STDY10168282	ERS6157150	KUK_XJCM_MJS229_CTCTAG_L007	MJS229	228	paired-end	modern	modern	MN	Cameroon	CMR	Bekora-Barombi	UNK	Homo sapiens	HS_04	HS	004
MN_CMR_UNK_HS_005	6432STDY10168283	ERS6157152	KUK_XJCM_MJS231_GAGAAG_L007	MJS231	467	paired-end	modern	modern	MN	Cameroon	CMR	Loe-Balondo	UNK	Homo sapiens	HS_05	HS	005
MN_DNK_COZ_PH_001	6432STDY10168284	ERS6157190	KUK_XJCM_MJS247_GACACT_L007	MJS247	B89_DK	paired-end	modern	modern	MN	Denmark	DNK	Copenhagen Zoo	COZ	Papio hamadryas	PH_01	PH	001
MN_DNK_COZ_PH_002	6432STDY10168285	ERS6157192	KUK_XJCM_MJS248_ACGCAT_L007	MJS248	B90_DK	paired-end	modern	modern	MN	Denmark	DNK	Copenhagen Zoo	COZ	Papio hamadryas	PH_02	PH	002
MN_ESP_MAL_CG_001	6432STDY10168294	ERS6157211	KUK_XJCM_MJS249_GACCGG_L007	MJS249	Col_1_ES	paired-end	modern	modern	MN	Spain	ESP	Málaga, Zoo of Fuengirola	MAL	Colobus guereza kikuyensis	CG_01	CG	001
MN_ESP_MAL_CG_002	6432STDY10168295	ERS6157210	KUK_XJCM_MJS250_GAGATA_L007	MJS250	Col_2_ES	paired-end	modern	modern	MN	Spain	ESP	Málaga, Zoo of Fuengirola	MAL	Colobus guereza kikuyensis	CG_01	CG	002
MN_HND_OLA_HS_001	6432STDY10168300	ERS6157221	KUK_XJCM_MJS239_ACATAC_L007	MJS239	H110_HN	paired-end	modern	modern	MN	Honduras	HND	Olanchito	OLA	Homo sapiens	HS_01	HS	001
MN_HND_OLA_HS_002	6432STDY10168301	ERS6157223	KUK_XJCM_MJS240_AGCATG_L007	MJS240	H111_HN	paired-end	modern	modern	MN	Honduras	HND	Olanchito	OLA	Homo sapiens	HS_02	HS	002
MN_HND_OLA_HS_003	6432STDY10168302	ERS6157224	KUK_XJCM_MJS241_CGATGA_L007	MJS241	H112_HN	paired-end	modern	modern	MN	Honduras	HND	Olanchito	OLA	Homo sapiens	HS_03	HS	003
MN_HND_OLA_HS_004	6432STDY10168303	ERS6157227	KUK_XJCM_MJS242_TAGATG_L007	MJS242	H113_HN	paired-end	modern	modern	MN	Honduras	HND	Olanchito	OLA	Homo sapiens	HS_03	HS	004
MN_HND_OLA_HS_005	6432STDY10168304	ERS6157229	KUK_XJCM_MJS243_TGTGAC_L007	MJS243	H114_HN	paired-end	modern	modern	MN	Honduras	HND	Olanchito	OLA	Homo sapiens	HS_03	HS	005
MN_HND_OLA_HS_006	6432STDY10168305	ERS6157231	KUK_XJCM_MJS244_TGCATA_L007	MJS244	H115_HN	paired-end	modern	modern	MN	Honduras	HND	Olanchito	OLA	Homo sapiens	HS_03	HS	006
MN_HND_OLA_HS_007	6432STDY10168306	ERS6157235	KUK_XJCM_MJS245_TCTCGC_L007	MJS245	H116_HN	paired-end	modern	modern	MN	Honduras	HND	Olanchito	OLA	Homo sapiens	HS_03	HS	007
MN_HND_SAL_HS_001	6432STDY10168307	ERS6157233	KUK_XJCM_MJS246_GACGAC_L007	MJS246	H117_HN	paired-end	modern	modern	MN	Honduras	HND	San Lorenzo	SAL	Homo sapiens	HS_04	HS	001
MN_TZA_CHA_HS_001	6432STDY10168308	ERS6157237	KUK_XJCM_MJS222_ACTGCC_L007	MJS222	ND005	paired-end	modern	modern	MN	Tanzania	TZA	Chake	CHA	Homo sapiens	HS_01	HS	001
MN_TZA_CHA_HS_002	6432STDY10168309	ERS6157239	KUK_XJCM_MJS223_GCAACG_L007	MJS223	ND036	paired-end	modern	modern	MN	Tanzania	TZA	Chake	CHA	Homo sapiens	HS_02	HS	002
MN_TZA_CHA_HS_003	6432STDY10168310	ERS6157241	KUK_XJCM_MJS224_CGACCT_L007	MJS224	ND062	paired-end	modern	modern	MN	Tanzania	TZA	Chake	CHA	Homo sapiens	HS_03	HS	003
MN_TZA_CHA_HS_004	6432STDY10168311	ERS6157243	KUK_XJCM_MJS225_TGACGT_L007	MJS225	ND100	paired-end	modern	modern	MN	Tanzania	TZA	Chake	CHA	Homo sapiens	HS_04	HS	004
MN_TZA_CHA_HS_005	6432STDY10168312	ERS6157247	KUK_XJCM_MJS226_TGTCTG_L007	MJS226	ND264	paired-end	modern	modern	MN	Tanzania	TZA	Chake	CHA	Homo sapiens	HS_05	HS	005
MN_UGA_DK_HS_001	6432STDY10168313	ERS6157246	KUK_KNTA_MJS135_GCAACG_L008	MJS135	H99_UG	paired-end	modern	modern	MN	Uganda	UGA	Denmark, Nejsum	DK	Homo sapiens	HS_01	HS	001
MN_UGA_DK_HS_002	6432STDY10168314	ERS6157249	KUK_KNTA_MJS136_CGACCT_L008	MJS136	H100_UG	paired-end	modern	modern	MN	Uganda	UGA	Denmark, Nejsum	DK	Homo sapiens	HS_01	HS	002
MN_UGA_DK_HS_003	6432STDY10168315	ERS6157251	KUK_KNTA_MJS137_TGACGT_L008	MJS137	H101_UG	paired-end	modern	modern	MN	Uganda	UGA	Denmark, Nejsum	DK	Homo sapiens	HS_01	HS	003
MN_UGA_KAB_HS_001	6432STDY10168316	ERS6157254	KUK_UM4U_MJS118_ACATAC_L001	MJS118	H12_UG	paired-end	modern	modern	MN	Uganda	UGA	Kabale, Nyakitokoli	KAB	Homo sapiens	HS_01	HS	001
MN_UGA_KAB_HS_002	6432STDY10168317	ERS6157255	KUK_UM4U_MJS119_TGAGCC_L001	MJS119	H13_UG	paired-end	modern	modern	MN	Uganda	UGA	Kabale, Nyakitokoli	KAB	Homo sapiens	HS_01	HS	002
MN_UGA_KAB_HS_003	6432STDY10168318	ERS6157258	KUK_UM4U_MJS120_AGCATG_L001	MJS120	H16_UG	paired-end	modern	modern	MN	Uganda	UGA	Kabale, Nyakitokoli	KAB	Homo sapiens	HS_02	HS	003
MN_UGA_KAB_HS_004	6432STDY10168319	ERS6157259	KUK_UM4U_MJS121_CGATGA_L001	MJS121	H17_UG	paired-end	modern	modern	MN	Uganda	UGA	Kabale, Nyakitokoli	KAB	Homo sapiens	HS_03	HS	004
MN_UGA_KAB_HS_005	6432STDY10168320	ERS6157261	KUK_UM4U_MJS122_TAGATG_L001	MJS122	H20_UG	paired-end	modern	modern	MN	Uganda	UGA	Kabale, Nyakitokoli	KAB	Homo sapiens	HS_04	HS	005
MN_UGA_KAB_HS_006	6432STDY10168321	ERS6157263	KUK_UM4U_MJS123_TGTGAC_L001	MJS123	H28_UG	paired-end	modern	modern	MN	Uganda	UGA	Kabale, Nyakitokoli	KAB	Homo sapiens	HS_05	HS	006
MN_UGA_KAB_HS_007	6432STDY10168322	ERS6157264	KUK_UM4U_MJS124_TGCATA_L001	MJS124	H34_UG	paired-end	modern	modern	MN	Uganda	UGA	Kabale, Nyakitokoli	KAB	Homo sapiens	HS_01	HS	007
MN_UGA_KAB_HS_008	6432STDY10168323	ERS6157265	KUK_UM4U_MJS125_TCTCGC_L001	MJS125	H36_UG	paired-end	modern	modern	MN	Uganda	UGA	Kabale, Nyakitokoli	KAB	Homo sapiens	HS_01	HS	008
MN_UGA_KAB_HS_009	6432STDY10168324	ERS6157267	KUK_UM4U_MJS126_TGATGC_L001	MJS126	H38_UG	paired-end	modern	modern	MN	Uganda	UGA	Kabale, Nyakitokoli	KAB	Homo sapiens	HS_06	HS	009
