# Supplementary material for: Population genomics of ancient and modern Trichuris trichiura
Source: Nat Commun. 2022 Jul 6;13:3888. doi: 10.1038/s41467-022-31487-x (PMC9259628; doi:10.1038/s41467-022-31487-x)
Supplement: Supplementary file 5 — Supplementary Data 2 [file 41467_2022_31487_MOESM5_ESM.xlsx]

## Sheet: Sheet1
Sample_ID	Total reads	Mapped reads	Mapped reads (%)	Nuclear Coverage (mean)	Nuclear Coverage (stddev)	mtDNA Coverage	Deamination (freq C>T_at_1st_position)	Deamination (std. error)	Sample_type	X-to-autosome ratio	Inferred sex from X-A ratio
AN_DNK_COA_EN_012	84907108	414549	0.0049	0.229	0.098	122.793	0.02	0.003	pooled	0.531206	mixed
AN_DNK_COG_EN_0012	59820117	5824339	0.0974	2.954	1.263	192.757	0.052	0.004	pooled	0.844595	mixed
AN_DNK_COG_EN_0034	42330895	1129167	0.0267	0.43	0.185	103.786	0.028	0.003	pooled	0.656031	mixed
AN_DNK_COG_EN_0056	21678717	1914721	0.0883	1.192	0.507	140.306	0.025	0.003	pooled	0.796064	mixed
AN_DNK_COG_EN_0078	22520963	222565	0.0099	0.117	0.052	15.385	0.017	0.003	pooled	0.863514	mixed
AN_DNK_COK_EN_0012	48264695	291828	0.006	0.051	0.023	35.535	0.015	0.003	pooled	0.467335	mixed
AN_DNK_COK_EN_0034	19623588	945598	0.0482	0.5	0.221	85.89	0.014	0.002	pooled	0.663066	mixed
AN_DNK_OBM_EN_0012	76864710	1077255	0.014	0.429	0.184	153.341	0.022	0.003	pooled	0.615221	mixed
AN_DNK_OBM_EN_0034	29999865	450396	0.015	0.235	0.1	85.455	0.036	0.004	pooled	0.632444	mixed
AN_DNK_OBM_EN_0056	29408936	233785	0.0079	0.105	0.045	60.048	0.033	0.004	pooled	0.511619	mixed
AN_DNK_OBM_EN_0078	30298325	1043452	0.0344	0.598	0.263	75.265	0.04	0.004	pooled	0.706264	mixed
AN_DNK_VIB_EN_0012	80794659	236670	0.0029	0.006	0.007	4.175	0.054	0.008	pooled	0.525685	mixed
AN_DNK_VIB_EN_345	85749384	786043	0.0092	0.137	0.061	42.859	0.03	0.004	pooled	0.659437	mixed
AN_LTU_VIL_EN_0012	52906324	89121	0.0017	0.026	0.015	1.015	0.026	0.004	pooled	0.606412	mixed
AN_NLD_KAM_EN_0012	29840160	1670067	0.056	0.879	0.376	164.158	0.061	0.005	pooled	0.736709	mixed
AN_NLD_KAM_EN_0034	58280515	4257373	0.073	2.236	0.964	174.571	0.027	0.003	pooled	0.854089	mixed
AN_NLD_ZWO_EN_0012	41247347	2129304	0.0516	1.111	0.477	166.357	0.021	0.003	pooled	0.788721	mixed
MN_CHN_GUA_HS_001	13966700	12576749	0.9005	11.225	4.727	569.298	0.016	0.003	single_worm	1.05777	female
MN_CHN_GUA_HS_002	10199728	9536036	0.9349	8.14	3.247	300.304	0.006	0.002	single_worm	0.897167	female
MN_CHN_GUA_HS_003	13395471	11814570	0.882	10.514	4.485	381.663	0.016	0.003	single_worm	1.02959	female
MN_CHN_GUA_HS_004	15021810	14483666	0.9642	11.603	10.353	116.566	0.013	0.003	single_worm	0.575796	male
MN_CHN_GUA_HS_005	17433927	15423658	0.8847	13.502	5.852	455.933	0.008	0.002	single_worm	1.07735	female
MN_CHN_GUA_HS_006	11824548	11230556	0.9498	8.472	3.917	121.591	0.007	0.002	single_worm	0.596948	male
MN_CHN_GUA_HS_007	15606611	15251238	0.9772	12.391	16.833	136.811	0.017	0.003	single_worm	0.569162	male
MN_CHN_GUA_LM_008	26578521	13346488	0.5022	8.828	4.703	371.799	0.033	0.006	single_worm	1.05863	female
MN_CHN_GUA_LM_009	20206517	5604777	0.2774	4.095	2.197	100.802	0.027	0.005	single_worm	0.996707	female
MN_CHN_GUA_LM_010	15240119	7722264	0.5067	5.54	2.978	188.411	0.032	0.005	single_worm	1.04835	female
MN_CMR_DJA_HS_001	7052965	40396	0.0057	0.03	0.016	2.671	0.005	0.001	pooled	0.543893	mixed
MN_CMR_DJA_HS_002	19810042	54495	0.0028	0.035	0.021	4.708	0.017	0.003	pooled	0.525662	mixed
MN_CMR_UNK_HS_003	19567923	12327	0.0006	0.006	0.005	0.572	0.014	0.003	pooled	0.562655	mixed
MN_CMR_UNK_HS_004	20824318	29679	0.0014	0.023	0.032	2.078	0.018	0.003	pooled	0.528371	mixed
MN_CMR_UNK_HS_005	9429454	8648	0.0009	0.003	0.004	0.328	0.023	0.005	pooled	0.644964	mixed
MN_DNK_COZ_PH_001	8945350	8170371	0.9134	6.866	3.769	479.401	0.017	0.003	single_worm	0.56641	male
MN_DNK_COZ_PH_002	14816526	12681453	0.8559	10.377	4.75	876.919	0.011	0.002	single_worm	0.549292	male
MN_ESP_MAL_CG_001	10339290	2823553	0.2731	1.859	1.42	13.222	0.046	0.006	single_worm	0.551438	male
MN_ESP_MAL_CG_002	21611998	6041016	0.2795	4.171	2.711	37.604	0.045	0.006	single_worm	0.95469	female
MN_HND_OLA_HS_001	17737833	16783999	0.9462	11.616	5.299	355.403	0.003	0.001	single_worm	0.584858	male
MN_HND_OLA_HS_002	16835657	15994779	0.9501	12.621	5.475	513.056	0.004	0.001	single_worm	0.561783	male
MN_HND_OLA_HS_003	8911293	7808190	0.8762	6.563	5.708	361.271	0.014	0.003	single_worm	0.84755	female
MN_HND_OLA_HS_004	23676083	22602310	0.9546	18.113	25.466	449.404	0.016	0.003	single_worm	0.567849	male
MN_HND_OLA_HS_005	7165805	6070129	0.8471	4.834	6.323	108.292	0.012	0.003	single_worm	0.569966	male
MN_HND_OLA_HS_006	6218006	4985028	0.8017	4.029	5.767	135.433	0.013	0.003	single_worm	0.560301	male
MN_HND_OLA_HS_007	5766253	5495468	0.953	4.24	1.929	129.011	0.006	0.002	single_worm	0.559802	male
MN_HND_SAL_HS_001	14459359	11782678	0.8149	10.06	4.275	1583.16	0.013	0.003	single_worm	0.915465	female
MN_TZA_CHA_HS_001	10527502	6749	0.0006	0.005	0.004	0.496	0.009	0.003	pooled	0.569944	mixed
MN_TZA_CHA_HS_002	10141219	7880	0.0008	0.004	0.004	1.645	0.018	0.004	pooled	0.507606	mixed
MN_TZA_CHA_HS_003	10114150	5685	0.0006	0.004	0.004	0.582	0.014	0.004	pooled	0.592229	mixed
MN_TZA_CHA_HS_004	28477536	14268	0.0005	0.01	0.009	1.653	0.007	0.002	pooled	0.525951	mixed
MN_TZA_CHA_HS_005	16989532	11404	0.0007	0.008	0.005	0.884	0.016	0.003	pooled	0.552268	mixed
MN_UGA_DK_HS_001	26224116	26040953	0.993	24.077	10.215	4553.04	0.01	0.002	single_worm	0.885109	female
MN_UGA_DK_HS_002	30689665	30124279	0.9816	22.669	9.967	1440.12	0.005	0.001	single_worm	0.545353	male
MN_UGA_DK_HS_003	22768386	22550237	0.9904	17.956	7.245	990.606	0.003	0.001	single_worm	0.546082	male
MN_UGA_KAB_HS_001	24928916	23617840	0.9474	20.681	8.19	2998.96	0.007	0.002	single_worm	0.912067	female
MN_UGA_KAB_HS_002	19977374	17213908	0.8617	13.934	6.289	760.842	0.003	0.001	single_worm	1.02448	female
MN_UGA_KAB_HS_003	22988251	8792001	0.3825	7.701	3.325	901.357	0.005	0.002	single_worm	0.935722	female
MN_UGA_KAB_HS_004	24693625	18986248	0.7689	13.716	5.509	342.846	0.004	0.001	single_worm	1.02209	female
MN_UGA_KAB_HS_005	24095625	23721487	0.9845	18.408	7.691	76.66	0.012	0.002	single_worm	0.593284	male
MN_UGA_KAB_HS_006	45443810	36498309	0.8032	31.071	12.244	4101.85	0.007	0.002	single_worm	0.952677	female
MN_UGA_KAB_HS_007	29179239	25091045	0.8599	21.195	7.958	2579.02	0.004	0.001	single_worm	0.86333	female
MN_UGA_KAB_HS_008	24572807	23759127	0.9669	16.897	7.081	226.402	0.005	0.001	single_worm	0.574681	male
MN_UGA_KAB_HS_009	16006701	14954450	0.9343	11.884	5.7	215.809	0.002	0.001	single_worm	0.554188	male
