# Supplementary material for: Population genomics of ancient and modern Trichuris trichiura
Source: Nat Commun. 2022 Jul 6;13:3888. doi: 10.1038/s41467-022-31487-x (PMC9259628; doi:10.1038/s41467-022-31487-x)
Supplement: Supplementary file 6 — Supplementary Data 3 [file 41467_2022_31487_MOESM6_ESM.xlsx]

## Sheet: Sheet1
COUNT	CHROMSOME	BIN_START	BIN_END	WEIGHTED_FST	GENE_START	GENE_END	GENE_ID	INTERPROSCAN_DESCRIPTION	INTERPROSCAN_SOURCE	INTERPROSCAN_SOURCE_ACCESSION
1	Trichuris_trichiura_00_001	140001	160000	0.689959	148052	148553	TTRE_0000918001
2	Trichuris_trichiura_00_001	580001	600000	0.876135	586516	589714	TTRE_0000644201	DUF1758 and DUF1759 and RVT 1 and Peptidase A17 d omain containing protein	UniProtKB/TrEMBL	A0A077ZEA3
3	Trichuris_trichiura_00_001	660001	680000	0.845787	674134	675613	TTRE_0000141501	Proton_antipo_M domain-containing protein	UniProtKB/TrEMBL	A0A077YYM7
4	Trichuris_trichiura_00_001	660001	680000	0.845787	679573	680000	TTRE_0000934001	NADH dehydrogenase subunit 5	UniProtKB/TrEMBL	A0A077ZQ97
5	Trichuris_trichiura_00_001	680001	700000	0.849077	680002	680342	TTRE_0000934001	NADH dehydrogenase subunit 5	UniProtKB/TrEMBL	A0A077ZQ97
6	Trichuris_trichiura_00_001	680001	700000	0.849077	680494	681355	TTRE_0000960001
7	Trichuris_trichiura_00_001	1060001	1080000	0.711186	1072235	1073415	TTRE_0000962101	RNase Zc3h12a domain containing protein	UniProtKB/TrEMBL	A0A077ZN94
8	Trichuris_trichiura_00_001	1120001	1140000	0.720853	1124131	1125310	TTRE_0000644901
9	Trichuris_trichiura_00_001	1160001	1180000	0.73833	1160002	1160883	TTRE_0000970301	Zinc knuckle protein	UniProtKB/TrEMBL	A0A077ZLM7
10	Trichuris_trichiura_00_001	1200001	1220000	0.695693	1217815	1218748	TTRE_0000915801
11	Trichuris_trichiura_00_002	200001	220000	0.740369	202085	202753	TTRE_0000886401	Major sperm protein	UniProtKB/TrEMBL	A0A077ZL72
12	Trichuris_trichiura_00_002	380001	400000	0.694029	388304	388704	TTRE_0000951701	ERG2 and Sigma1 receptor like protein	UniProtKB/TrEMBL	A0A077ZL84
13	Trichuris_trichiura_00_002	480001	500000	0.682445	486883	487248	TTRE_0000952201	Pao retrotransposon peptidase superfamily	UniProtKB/TrEMBL	A0A077ZQP7
14	Trichuris_trichiura_00_002	480001	500000	0.682445	487339	487707	TTRE_0000952101	Zinc knuckle protein	UniProtKB/TrEMBL	A0A077ZMX1
15	Trichuris_trichiura_00_012	40001	60000	0.764336	57888	59059	TTRE_0000621601
16	Trichuris_trichiura_1_001	8740001	8760000	0.633127	8744263	8750714	TTRE_0000476601	Paramyosin	UniProtKB/TrEMBL	A0A077Z8E1
17	Trichuris_trichiura_1_001	8740001	8760000	0.633127	8755841	8758608	TTRE_0000476701	AP 2 complex subunit mu	UniProtKB/TrEMBL	A0A077Z7L0
18	Trichuris_trichiura_1_001	8760001	8780000	0.698932	8762310	8763087	TTRE_0000476801	Tissue factor pathway inhibitor	UniProtKB/TrEMBL	A0A077ZA04
19	Trichuris_trichiura_1_001	8760001	8780000	0.698932	8763128	8764033	TTRE_0000476901	Heparan sulfate glucosamine 3 O sulfotransferase	UniProtKB/TrEMBL	A0A077Z9M9
20	Trichuris_trichiura_1_001	8780001	8800000	0.694328	8781353	8783096	TTRE_0000477001
21	Trichuris_trichiura_1_001	8780001	8800000	0.694328	8783743	8784360	TTRE_0000477101
22	Trichuris_trichiura_1_001	8780001	8800000	0.694328	8788264	8788987	TTRE_0000477201	Proteasome endopeptidase complex	UniProtKB/TrEMBL	A0A077Z7L4
23	Trichuris_trichiura_1_001	8780001	8800000	0.694328	8791016	8793396	TTRE_0000477301	Metaxin 2	UniProtKB/TrEMBL	A0A077ZA10
24	Trichuris_trichiura_1_001	8780001	8800000	0.694328	8797545	8798040	TTRE_0000477401	Transthyretin-like protein 46	UniProtKB/TrEMBL	A0A077Z9N4
25	Trichuris_trichiura_1_001	10280001	10300000	0.633179	10280002	10281086	TTRE_0000806401	Allograft inflammatory factor 1	UniProtKB/TrEMBL	A0A077ZJ15
26	Trichuris_trichiura_1_001	10280001	10300000	0.633179	10292372	10300000	TTRE_0000666101	Calcium homeostasis endoplasmic reticulum protein	UniProtKB/TrEMBL	A0A077ZD76
27	Trichuris_trichiura_1_001	10420001	10440000	0.692318	10421573	10422166	TTRE_0000610501	Ras domain containing protein	UniProtKB/TrEMBL	A0A077ZD94
28	Trichuris_trichiura_1_001	10460001	10480000	0.648104	10475816	10477041	TTRE_0000521801	Actin	UniProtKB/TrEMBL	A0A077ZE37
29	Trichuris_trichiura_1_001	10560001	10580000	0.678781	10569515	10570801	TTRE_0000673901	Calponin family protein	UniProtKB/TrEMBL	A0A077ZFT7
30	Trichuris_trichiura_1_002	4880001	4900000	0.626563	4882590	4883468	TTRE_0000003401	Acyl protein thioesterase	UniProtKB/TrEMBL	A0A077YZG1
31	Trichuris_trichiura_1_002	4920001	4940000	0.651868	4931907	4937515	TTRE_0000003901	Sodium/hydrogen exchanger	UniProtKB/TrEMBL	A0A077YZG5
32	Trichuris_trichiura_1_002	4980001	5000000	0.637693	4986116	4990887	TTRE_0000004001	Spalt protein	UniProtKB/TrEMBL	A0A077YVJ3
33	Trichuris_trichiura_1_002	5000001	5020000	0.703419	5000002	5003322	TTRE_0000004101	Tubby-like protein	UniProtKB/TrEMBL	A0A077YUM5
34	Trichuris_trichiura_1_002	4980001	5000000	0.637693	4994006	5000000	TTRE_0000004101	Tubby-like protein	UniProtKB/TrEMBL	A0A077YUM5
35	Trichuris_trichiura_1_002	5000001	5020000	0.703419	5009497	5014174	TTRE_0000004201
36	Trichuris_trichiura_1_002	5000001	5020000	0.703419	5018269	5020000	TTRE_0000004301	Cuticlin 1	UniProtKB/TrEMBL	A0A077YVL6
37	Trichuris_trichiura_1_002	5020001	5040000	0.626874	5020002	5023125	TTRE_0000004301	Cuticlin 1	UniProtKB/TrEMBL	A0A077YVL6
38	Trichuris_trichiura_1_002	5020001	5040000	0.626874	5033026	5038065	TTRE_0000004401
39	Trichuris_trichiura_1_002	5020001	5040000	0.626874	5039892	5040000	TTRE_0000004501	Histone deacetylase	UniProtKB/TrEMBL	A0A077YVJ6
40	Trichuris_trichiura_1_004	1020001	1040000	0.653205	1020002	1022389	TTRE_0000401601	MBOAT domain containing protein	UniProtKB/TrEMBL	A0A077Z803
41	Trichuris_trichiura_1_004	1020001	1040000	0.653205	1026300	1027967	TTRE_0000401501
42	Trichuris_trichiura_1_004	1020001	1040000	0.653205	1032843	1033211	TTRE_0000401401
43	Trichuris_trichiura_1_004	1060001	1080000	0.631371	1063653	1064814	TTRE_0000401201
44	Trichuris_trichiura_1_004	1260001	1280000	0.720588	1263048	1265794	TTRE_0000506001	Dynein light intermediate chain	UniProtKB/TrEMBL	A0A077ZB19
45	Trichuris_trichiura_1_004	1260001	1280000	0.720588	1272863	1273765	TTRE_0000505901	Leucine Rich Repeat family protein	UniProtKB/TrEMBL	A0A077Z8J6
46	Trichuris_trichiura_1_004	1280001	1300000	0.754187	1281021	1281586	TTRE_0000575801	Carm_PH domain-containing protein	UniProtKB/TrEMBL	A0A077ZAY3
47	Trichuris_trichiura_1_004	1280001	1300000	0.754187	1298247	1298912	TTRE_0000575701	G_PROTEIN_RECEP_F1_2 domain-containing protein	UniProtKB/TrEMBL	A0A077ZFL8
48	Trichuris_trichiura_1_004	1300001	1320000	0.702994	1307603	1308199	TTRE_0000575601	DUF2036 domain containing protein	UniProtKB/TrEMBL	A0A077ZC85
49	Trichuris_trichiura_1_004	1300001	1320000	0.702994	1310793	1316962	TTRE_0000575501	Protein CUTL 11	UniProtKB/TrEMBL	A0A077ZD32
50	Trichuris_trichiura_1_004	1320001	1340000	0.632619	1322632	1323841	TTRE_0000575401	EF-hand 4 and MCLC and MMR HSR1 domain containing protein	UniProtKB/TrEMBL	A0A077ZAQ6
51	Trichuris_trichiura_1_004	1340001	1360000	0.61754	1347321	1348003	TTRE_0000580201	Emp24:gp25L:p24 family protein	UniProtKB/TrEMBL	A0A077ZFR6
52	Trichuris_trichiura_1_004	1340001	1360000	0.61754	1351845	1352275	TTRE_0000580101
53	Trichuris_trichiura_1_004	1340001	1360000	0.61754	1353342	1353821	TTRE_0000580001	Small heat shock protein	UniProtKB/TrEMBL	A0A077ZD68
54	Trichuris_trichiura_1_004	1340001	1360000	0.61754	1356325	1357698	TTRE_0000579901	Proteasome endopeptidase complex	UniProtKB/TrEMBL	A0A077ZAW8
55	Trichuris_trichiura_1_004	1340001	1360000	0.61754	1359081	1360000	TTRE_0000579801	Calreticulin	UniProtKB/TrEMBL	A0A077ZB14
56	Trichuris_trichiura_1_006	80001	100000	0.751383	88050	94975	TTRE_0000616301	EST1 DNA bind and PIN 4 domain containing protein	UniProtKB/TrEMBL	A0A077ZBV4
57	Trichuris_trichiura_1_006	100001	120000	0.733862	101110	104505	TTRE_0000616201	Probable NADH dehydrogenase [ubiquinone] 1 beta s ubcomplex subunit 2, mitochondrial	UniProtKB/TrEMBL	A0A077ZGW1
58	Trichuris_trichiura_1_006	140001	160000	0.700452	140002	150879	TTRE_0000602701	WD40 and TLE N domain containing protein	UniProtKB/TrEMBL	A0A077ZBH1
59	Trichuris_trichiura_1_006	120001	140000	0.750223	138746	140000	TTRE_0000602701	WD40 and TLE N domain containing protein	UniProtKB/TrEMBL	A0A077ZBH1
60	Trichuris_trichiura_1_006	160001	180000	0.757005	167571	168424	TTRE_0000602801	Homeobox protein goosecoid A	UniProtKB/TrEMBL	A0A077ZDZ5
61	Trichuris_trichiura_1_006	220001	240000	0.669789	225000	226407	TTRE_0000737201	ATP synthase subunit alpha	UniProtKB/TrEMBL	A0A077ZF69
62	Trichuris_trichiura_1_006	220001	240000	0.669789	230792	240000	TTRE_0000737301	Protein polybromo 1	UniProtKB/TrEMBL	A0A077ZHD0
63	Trichuris_trichiura_1_006	240001	260000	0.722585	240002	244097	TTRE_0000737301	Protein polybromo 1	UniProtKB/TrEMBL	A0A077ZHD0
64	Trichuris_trichiura_1_006	240001	260000	0.722585	255123	256223	TTRE_0000714101	PWI domain containing protein	UniProtKB/TrEMBL	A0A077ZEP1
65	Trichuris_trichiura_1_006	360001	380000	0.699529	367362	371124	TTRE_0000617101	CBM 14 and TSP 1 domain containing protein	UniProtKB/TrEMBL	A0A077ZDE6
66	Trichuris_trichiura_1_006	360001	380000	0.699529	371611	372222	TTRE_0000617001
67	Trichuris_trichiura_1_006	400001	420000	0.648003	415153	417190	TTRE_0000363401	Ras domain containing protein	UniProtKB/TrEMBL	A0A077Z4F7
68	Trichuris_trichiura_1_006	400001	420000	0.648003	418127	420000	TTRE_0000363501
69	Trichuris_trichiura_1_006	420001	440000	0.662965	420002	423699	TTRE_0000363501
70	Trichuris_trichiura_1_006	420001	440000	0.662965	439743	440000	TTRE_0000363601	Troponin C	UniProtKB/TrEMBL	A0A077Z6A8
71	Trichuris_trichiura_1_006	440001	460000	0.639765	440002	440650	TTRE_0000363601	Troponin C	UniProtKB/TrEMBL	A0A077Z6A8
72	Trichuris_trichiura_1_006	440001	460000	0.639765	443995	450021	TTRE_0000363701	Pyruvate dehydrogenase phosphatase regulatory sub unit	UniProtKB/TrEMBL	A0A077Z9L5
73	Trichuris_trichiura_1_006	440001	460000	0.639765	456531	457521	TTRE_0000363801	DAO domain containing protein	UniProtKB/TrEMBL	A0A077Z5E8
74	Trichuris_trichiura_1_006	520001	540000	0.633317	526848	528324	TTRE_0000475401	MYND finger family protein	UniProtKB/TrEMBL	A0A077Z9L2
75	Trichuris_trichiura_1_006	540001	560000	0.745686	559309	560000	TTRE_0000475501	Homeobox KN domain containing protein	UniProtKB/TrEMBL	A0A077ZCZ0
76	Trichuris_trichiura_1_006	560001	580000	0.690653	560002	561103	TTRE_0000475501	Homeobox KN domain containing protein	UniProtKB/TrEMBL	A0A077ZCZ0
77	Trichuris_trichiura_1_007	40001	60000	0.644611	40002	40811	TTRE_0000626801	Helicase C and DEAD domain containing protein	UniProtKB/TrEMBL	A0A077ZC32
78	Trichuris_trichiura_1_007	40001	60000	0.644611	55821	58247	TTRE_0000626901	DnaJ domain containing protein	UniProtKB/TrEMBL	A0A077ZEK9
79	Trichuris_trichiura_1_007	80001	100000	0.682553	93507	100000	TTRE_0000439001	RNA binding protein fusilli	UniProtKB/TrEMBL	A0A077ZBY1
80	Trichuris_trichiura_1_007	100001	120000	0.73014	100002	114537	TTRE_0000439001	RNA binding protein fusilli	UniProtKB/TrEMBL	A0A077ZBY1
81	Trichuris_trichiura_1_007	100001	120000	0.73014	118775	120000	TTRE_0000439101	Protein kinase C	UniProtKB/TrEMBL	A0A077Z7D7
82	Trichuris_trichiura_1_007	120001	140000	0.673586	120002	126341	TTRE_0000439101	Protein kinase C	UniProtKB/TrEMBL	A0A077Z7D7
83	Trichuris_trichiura_1_007	120001	140000	0.673586	130871	134654	TTRE_0000439201	Ceramide glucosyltransferase	UniProtKB/TrEMBL	A0A077Z6N9
84	Trichuris_trichiura_1_007	120001	140000	0.673586	138334	140000	TTRE_0000843601	DUF1387 domain containing protein	UniProtKB/TrEMBL	A0A077ZMZ6
85	Trichuris_trichiura_1_007	200001	220000	0.686033	200002	203334	TTRE_0000713701
86	Trichuris_trichiura_1_007	200001	220000	0.686033	210555	220000	TTRE_0000713801	Syntaxin binding protein 5	UniProtKB/TrEMBL	A0A077ZGP3
87	Trichuris_trichiura_1_007	220001	240000	0.691002	220002	220396	TTRE_0000713801	Syntaxin binding protein 5	UniProtKB/TrEMBL	A0A077ZGP3
88	Trichuris_trichiura_1_007	220001	240000	0.691002	226882	227329	TTRE_0000642301	LIM domain containing protein	UniProtKB/TrEMBL	A0A077ZHL3
89	Trichuris_trichiura_1_007	220001	240000	0.691002	232891	233449	TTRE_0000642401
90	Trichuris_trichiura_1_007	240001	260000	0.659307	259250	260000	TTRE_0000642501	EfThoc1 and Death domain containing protein	UniProtKB/TrEMBL	A0A077ZCM8
91	Trichuris_trichiura_1_007	280001	300000	0.631855	291302	292066	TTRE_0000656701	Achaete scute 1b	UniProtKB/TrEMBL	A0A077ZI48
92	Trichuris_trichiura_1_007	360001	380000	0.666619	369287	369914	TTRE_0000981001	Glyco hydro 18 domain containing protein	UniProtKB/TrEMBL	A0A077ZLY3
93	Trichuris_trichiura_2_001	60001	80000	0.353985	60002	61380	TTRE_0000216101	26S proteasome non-ATPase regulatory subunit 13	UniProtKB/TrEMBL	A0A077Z0E2
94	Trichuris_trichiura_2_001	60001	80000	0.353985	73678	74217	TTRE_0000216201	GABAA receptor-associated protein	UniProtKB/TrEMBL	A0A077Z2E9
95	Trichuris_trichiura_2_001	80001	100000	0.403719	82113	84798	TTRE_0000216301	Homeobox protein engrailed-like	UniProtKB/TrEMBL	A0A077Z1V2
96	Trichuris_trichiura_2_001	100001	120000	0.365774	104813	106133	TTRE_0000216401	Collagen domain containing protein	UniProtKB/TrEMBL	A0A077Z5C0
97	Trichuris_trichiura_2_001	100001	120000	0.365774	106902	108243	TTRE_0000216501	Dna repair protein rad51	UniProtKB/TrEMBL	A0A077Z1E0
98	Trichuris_trichiura_2_001	100001	120000	0.365774	113379	114670	TTRE_0000216601	Transmembrane protein 129	UniProtKB/TrEMBL	A0A077Z0E4
99	Trichuris_trichiura_2_001	100001	120000	0.365774	119493	120000	TTRE_0000216701	TPR 11 domain containing protein	UniProtKB/TrEMBL	A0A077Z2F3
100	Trichuris_trichiura_2_001	140001	160000	0.351462	140002	147947	TTRE_0000217001	RWD and DUF1115 domain containing protein	UniProtKB/TrEMBL	A0A077Z1E7
101	Trichuris_trichiura_2_001	160001	180000	0.35139	167621	172289	TTRE_0000217101
102	Trichuris_trichiura_2_001	160001	180000	0.35139	177700	178582	TTRE_0000217201	MRP-S31 domain containing protein	UniProtKB/TrEMBL	A0A077Z2F7
103	Trichuris_trichiura_2_001	9740001	9760000	0.352664	9754118	9756526	TTRE_0000857001	Trypsin domain containing protein	UniProtKB/TrEMBL	A0A077ZIJ9
104	Trichuris_trichiura_2_001	9980001	10000000	0.34771	9980002	9983094	TTRE_0000812401	HSL N and Abhydrolase 3 domain containing protein	UniProtKB/TrEMBL	A0A077ZJ69
105	Trichuris_trichiura_2_001	9980001	10000000	0.34771	9995348	10000000	TTRE_0000830901
106	Trichuris_trichiura_2_001	10020001	10040000	0.390881	10023498	10028363	TTRE_0000454401
107	Trichuris_trichiura_2_001	14680001	14700000	0.412481	14685662	14686386	TTRE_0000798001	Putative acyl-coenzyme A binding protein	UniProtKB/TrEMBL	A0A077ZH49
108	Trichuris_trichiura_2_001	16340001	16360000	0.423755	16358933	16360000	TTRE_0000729201	EB domain containing protein	UniProtKB/TrEMBL	A0A077ZH16
109	Trichuris_trichiura_2_001	16360001	16380000	0.354635	16360002	16364774	TTRE_0000729201	EB domain containing protein	UniProtKB/TrEMBL	A0A077ZH16
110	Trichuris_trichiura_2_001	16380001	16400000	0.519061	16389411	16390375	TTRE_0000804001	Zona pellucida domain containing protein	UniProtKB/TrEMBL	A0A077ZH87
111	Trichuris_trichiura_2_001	16380001	16400000	0.519061	16391526	16391918	TTRE_0000803901
112	Trichuris_trichiura_2_001	16400001	16420000	0.443652	16400002	16404935	TTRE_0000662401	Protein CBG07648	UniProtKB/TrEMBL	A0A077ZD81
113	Trichuris_trichiura_2_001	16380001	16400000	0.519061	16395042	16400000	TTRE_0000662401	Protein CBG07648	UniProtKB/TrEMBL	A0A077ZD81
114	Trichuris_trichiura_2_001	16400001	16420000	0.443652	16402394	16414310	TTRE_0000662501	UDP-glucuronosyltransferase	UniProtKB/TrEMBL	A0A077ZFK0
115	Trichuris_trichiura_2_001	16420001	16440000	0.457466	16431830	16432482	TTRE_0000662601
116	Trichuris_trichiura_2_001	16420001	16440000	0.457466	16439420	16440000	TTRE_0000897001
117	Trichuris_trichiura_2_001	28300001	28320000	0.387441	28302680	28306683	TTRE_0000455301	Proton myo inositol cotransporter	UniProtKB/TrEMBL	A0A077Z9G9
118	Trichuris_trichiura_2_001	28300001	28320000	0.387441	28317308	28320000	TTRE_0000455401	Sugar tr domain containing protein	UniProtKB/TrEMBL	A0A077Z925
119	Trichuris_trichiura_2_001	28640001	28660000	0.472777	28640002	28642104	TTRE_0000314601	Liprin-alpha	UniProtKB/TrEMBL	A0A077Z483
120	Trichuris_trichiura_2_001	28640001	28660000	0.472777	28642979	28643812	TTRE_0000314501	UvdE domain containing protein	UniProtKB/TrEMBL	A0A077Z850
121	Trichuris_trichiura_2_001	28640001	28660000	0.472777	28655349	28658939	TTRE_0000209601	ECH domain containing protein	UniProtKB/TrEMBL	A0A077Z1N9
122	Trichuris_trichiura_2_001	28660001	28680000	0.372429	28660164	28661952	TTRE_0000209701	Zf-H2C2 2 domain containing protein	UniProtKB/TrEMBL	A0A077Z569
123	Trichuris_trichiura_2_001	28660001	28680000	0.372429	28662030	28669105	TTRE_0000209801
124	Trichuris_trichiura_2_001	28660001	28680000	0.372429	28676235	28680000	TTRE_0000209901	DNA-directed RNA polymerase subunit	UniProtKB/TrEMBL	A0A077Z093
125	Trichuris_trichiura_2_001	28840001	28860000	0.42985	28840002	28845309	TTRE_0000754501	Matrix metalloproteinase 17	UniProtKB/TrEMBL	A0A077ZKV2
126	Trichuris_trichiura_2_001	28840001	28860000	0.42985	28855441	28860000	TTRE_0000865301	Serpin domain containing protein	UniProtKB/TrEMBL	A0A077ZKR2
127	Trichuris_trichiura_2_001	28860001	28880000	0.371816	28860002	28862677	TTRE_0000865301	Serpin domain containing protein	UniProtKB/TrEMBL	A0A077ZKR2
128	Trichuris_trichiura_2_001	28860001	28880000	0.371816	28864983	28865394	TTRE_0000960401	Serpin domain containing protein	UniProtKB/TrEMBL	A0A077ZN18
129	Trichuris_trichiura_2_001	28940001	28960000	0.363334	28940002	28955512	TTRE_0000279301	ABC transporter, ATP binding protein	UniProtKB/TrEMBL	A0A077Z4C8
130	Trichuris_trichiura_2_001	28940001	28960000	0.363334	28959288	28960000	TTRE_0000279401	DEAD and Helicase C domain containing protein	UniProtKB/TrEMBL	A0A077Z3T7
131	Trichuris_trichiura_2_001	28960001	28980000	0.432909	28960002	28960670	TTRE_0000279401	DEAD and Helicase C domain containing protein	UniProtKB/TrEMBL	A0A077Z3T7
132	Trichuris_trichiura_2_001	28960001	28980000	0.432909	28962445	28964184	TTRE_0000279501	26s proteasome non atpase regulatory subunit	UniProtKB/TrEMBL	A0A077Z779
133	Trichuris_trichiura_2_001	28960001	28980000	0.432909	28967241	28969699	TTRE_0000279601	Negative elongation factor D	UniProtKB/TrEMBL	A0A077Z3B0
134	Trichuris_trichiura_2_001	28960001	28980000	0.432909	28970977	28973795	TTRE_0000279701	Proteasome activator pa28 beta subunit family pro tein	UniProtKB/TrEMBL	A0A077Z201
135	Trichuris_trichiura_2_001	28980001	29000000	0.424737	28980002	28990638	TTRE_0000279801	EGF CA and EGF 3 domain containing protein	UniProtKB/TrEMBL	A0A077Z4D5
136	Trichuris_trichiura_2_001	28960001	28980000	0.432909	28978122	28980000	TTRE_0000279801	EGF CA and EGF 3 domain containing protein	UniProtKB/TrEMBL	A0A077Z4D5
137	Trichuris_trichiura_2_001	28980001	29000000	0.424737	28992488	28996478	TTRE_0000279901	Serine/threonine-protein phosphatase	UniProtKB/TrEMBL	A0A077Z3U3
138	Trichuris_trichiura_2_001	28980001	29000000	0.424737	28998299	29000000	TTRE_0000280001	Y phosphatase domain containing protein	UniProtKB/TrEMBL	A0A077Z783
139	Trichuris_trichiura_2_001	29000001	29020000	0.400731	29000002	29000429	TTRE_0000280001	Y phosphatase domain containing protein	UniProtKB/TrEMBL	A0A077Z783
140	Trichuris_trichiura_2_001	29000001	29020000	0.400731	29004125	29007433	TTRE_0000280101	Ipi1 N domain containing protein	UniProtKB/TrEMBL	A0A077Z3B4
141	Trichuris_trichiura_2_001	29000001	29020000	0.400731	29007637	29010336	TTRE_0000280201	Solute carrier family 25 member 46	UniProtKB/TrEMBL	A0A077Z205
142	Trichuris_trichiura_2_001	29000001	29020000	0.400731	29013053	29014834	TTRE_0000280301	Mpp10 domain containing protein	UniProtKB/TrEMBL	A0A077Z4E1
143	Trichuris_trichiura_2_001	29000001	29020000	0.400731	29015965	29020000	TTRE_0000280401	Integrin alpha pat 2	UniProtKB/TrEMBL	A0A077Z3W2
144	Trichuris_trichiura_2_001	29020001	29040000	0.411114	29020002	29029117	TTRE_0000280401	Integrin alpha pat 2	UniProtKB/TrEMBL	A0A077Z3W2
145	Trichuris_trichiura_2_001	29020001	29040000	0.411114	29039040	29040000	TTRE_0000280501
146	Trichuris_trichiura_2_001	29040001	29060000	0.495666	29040002	29047056	TTRE_0000280501
147	Trichuris_trichiura_2_001	29040001	29060000	0.495666	29049556	29054497	TTRE_0000280601	Carboxylesterase	UniProtKB/TrEMBL	A0A077Z3B9
148	Trichuris_trichiura_2_001	29040001	29060000	0.495666	29054702	29057377	TTRE_0000280701
149	Trichuris_trichiura_2_001	29060001	29080000	0.466248	29061054	29063174	TTRE_0000280801	Ribosomal protein L24	UniProtKB/TrEMBL	A0A077Z4E8
150	Trichuris_trichiura_2_001	29060001	29080000	0.466248	29065345	29066777	TTRE_0000280901	Mito carr domain containing protein	UniProtKB/TrEMBL	A0A077Z3W8
151	Trichuris_trichiura_2_001	29060001	29080000	0.466248	29072204	29072690	TTRE_0000422001
152	Trichuris_trichiura_2_001	29060001	29080000	0.466248	29073972	29080000	TTRE_0000422101
153	Trichuris_trichiura_2_001	29080001	29100000	0.436637	29080002	29082782	TTRE_0000422101
154	Trichuris_trichiura_2_001	29100001	29120000	0.483689	29100002	29103134	TTRE_0000422201	ATP binding cassette sub family A	UniProtKB/TrEMBL	A0A077Z8I5
155	Trichuris_trichiura_2_001	29080001	29100000	0.436637	29086885	29100000	TTRE_0000422201	ATP binding cassette sub family A	UniProtKB/TrEMBL	A0A077Z8I5
156	Trichuris_trichiura_2_001	29100001	29120000	0.483689	29111279	29120000	TTRE_0000422301	Patched domain containing protein	UniProtKB/TrEMBL	A0A077Z855
157	Trichuris_trichiura_2_001	29120001	29140000	0.527147	29120002	29128608	TTRE_0000422301	Patched domain containing protein	UniProtKB/TrEMBL	A0A077Z855
158	Trichuris_trichiura_2_001	29120001	29140000	0.527147	29129510	29140000	TTRE_0000422401	SAM 2 domain containing protein	UniProtKB/TrEMBL	A0A077ZBC0
159	Trichuris_trichiura_3_001	3620001	3640000	0.345472	3631364	3632316	TTRE_0000578701	Glyco hydro 19 domain containing protein	UniProtKB/TrEMBL	A0A077ZFP5
160	Trichuris_trichiura_3_001	3620001	3640000	0.345472	3639852	3640000	TTRE_0000578501	Protein farnesyltransferase subunit beta	UniProtKB/TrEMBL	A0A077ZD57
161	Trichuris_trichiura_3_001	8540001	8560000	0.34086	8541404	8549659	TTRE_0000008301	Sulfate tra GLY and STAS and Sulfate transp domai n containing protein	UniProtKB/TrEMBL	A0A077YVP6
162	Trichuris_trichiura_3_001	8540001	8560000	0.34086	8551043	8552247	TTRE_0000008401	Acetyltransf 1 domain containing protein	UniProtKB/TrEMBL	A0A077YZL8
163	Trichuris_trichiura_3_001	8540001	8560000	0.34086	8558685	8560000	TTRE_0000008501	Laminin G 2 and EGF and Cadherin and Laminin EGF domain containing protein	UniProtKB/TrEMBL	A0A077YVM5
164	Trichuris_trichiura_3_002	2840001	2860000	0.365266	2842394	2844091	TTRE_0000122301	YIF1 domain containing protein	UniProtKB/TrEMBL	A0A077YYQ4
165	Trichuris_trichiura_3_002	2840001	2860000	0.365266	2850420	2851541	TTRE_0000122201	HEGF domain containing protein	UniProtKB/TrEMBL	A0A077Z2N4
166	Trichuris_trichiura_3_002	2860001	2880000	0.467107	2873152	2874237	TTRE_0000122101
167	Trichuris_trichiura_3_002	2880001	2900000	0.385761	2887821	2888836	TTRE_0000122001	Lipocalin domain containing protein	UniProtKB/TrEMBL	A0A077YZR9
168	Trichuris_trichiura_3_002	3360001	3380000	0.382886	3364285	3364951	TTRE_0000258201	SPT2 chromatin protein	UniProtKB/TrEMBL	A0A077Z1G0
169	Trichuris_trichiura_3_002	3360001	3380000	0.382886	3370369	3371196	TTRE_0000258101	Purine nucleoside phosphorylase	UniProtKB/TrEMBL	A0A077Z2P2
170	Trichuris_trichiura_3_002	3360001	3380000	0.382886	3373013	3373480	TTRE_0000258001	SPT2 domain containing protein	UniProtKB/TrEMBL	A0A077Z6L4
171	Trichuris_trichiura_3_002	3360001	3380000	0.382886	3373710	3375229	TTRE_0000257901	UPF0536 protein C12orf66	UniProtKB/TrEMBL	A0A077Z390
172	Trichuris_trichiura_3_002	3360001	3380000	0.382886	3376830	3380000	TTRE_0000257801	Transmembrane cochlear expressed protein tmc fam ily membrane protein	UniProtKB/TrEMBL	A0A077Z3Q8
173	Trichuris_trichiura_3_002	3380001	3400000	0.399463	3380002	3382928	TTRE_0000257801	Transmembrane cochlear expressed protein tmc fam ily membrane protein	UniProtKB/TrEMBL	A0A077Z3Q8
174	Trichuris_trichiura_3_002	3380001	3400000	0.399463	3391976	3394589	TTRE_0000257701	Heat shock protein 90	UniProtKB/TrEMBL	A0A077Z1F6
175	Trichuris_trichiura_3_002	3380001	3400000	0.399463	3395545	3396363	TTRE_0000257601	Vacuolar protein sorting associated protein 36	UniProtKB/TrEMBL	A0A077Z2N9
176	Trichuris_trichiura_3_002	3380001	3400000	0.399463	3396525	3397433	TTRE_0000257501	NAD dependent ADP ribosyltransferase sirtuin 4	UniProtKB/TrEMBL	A0A077Z6L0
177	Trichuris_trichiura_3_002	3400001	3420000	0.463428	3406001	3416980	TTRE_0000257401
178	Trichuris_trichiura_3_002	3420001	3440000	0.41796	3420002	3429378	TTRE_0000257301	Protein vertebrate piccolo	UniProtKB/TrEMBL	A0A077Z3Q3
179	Trichuris_trichiura_3_002	3400001	3420000	0.463428	3417373	3420000	TTRE_0000257301	Protein vertebrate piccolo	UniProtKB/TrEMBL	A0A077Z3Q3
180	Trichuris_trichiura_3_002	3420001	3440000	0.41796	3434261	3436424	TTRE_0000257201	Eukaryotic initiation factor 4F subunit p150 (EIF 4F p150) (EIF-4F p150) (MRNA cap-binding protein complex su bunit p150)	UniProtKB/TrEMBL	A0A077Z1F1
181	Trichuris_trichiura_3_002	3440001	3460000	0.441322	3443940	3445820	TTRE_0000749201	Zf-C2H2 jaz and zf-met domain containing protein	UniProtKB/TrEMBL	A0A077ZFL7
182	Trichuris_trichiura_3_002	3440001	3460000	0.441322	3453712	3456626	TTRE_0000749101	Suppression of tumorigenicity	UniProtKB/TrEMBL	A0A077ZFP9
183	Trichuris_trichiura_3_002	3460001	3480000	0.470344	3460688	3462726	TTRE_0000749001	C1 1 and Pkinase and Pkinase C domain containing protein	UniProtKB/TrEMBL	A0A077ZKQ4
184	Trichuris_trichiura_3_002	3460001	3480000	0.470344	3468537	3469362	TTRE_0000809701	C1 1 domain containing protein	UniProtKB/TrEMBL	A0A077ZHC5
185	Trichuris_trichiura_3_002	3480001	3500000	0.398044	3482833	3485679	TTRE_0000905301	GSHPx domain containing protein	UniProtKB/TrEMBL	A0A077ZJY1
186	Trichuris_trichiura_3_002	3480001	3500000	0.398044	3486956	3487348	TTRE_0000985001
187	Trichuris_trichiura_3_002	3480001	3500000	0.398044	3493757	3498989	TTRE_0000856301	RRM 1 domain containing protein	UniProtKB/TrEMBL	A0A077ZKB2
188	Trichuris_trichiura_3_002	3500001	3520000	0.34048	3504528	3505226	TTRE_0000698201	Pseudouridine 5' monophosphatase	UniProtKB/TrEMBL	A0A077ZGE1
189	Trichuris_trichiura_3_002	3500001	3520000	0.34048	3505709	3510057	TTRE_0000698301	Family with sequence similarity 116, member B	UniProtKB/TrEMBL	A0A077ZFT0
190	Trichuris_trichiura_3_002	3500001	3520000	0.34048	3510428	3514453	TTRE_0000698401	Zinc phosphodiesterase ELAC protein 2	UniProtKB/TrEMBL	A0A077ZJD8
191	Trichuris_trichiura_3_002	3500001	3520000	0.34048	3519342	3520000	TTRE_0000698501	Bromodomain domain containing protein	UniProtKB/TrEMBL	A0A077ZE85
192	Trichuris_trichiura_3_002	3560001	3580000	0.46122	3561937	3562972	TTRE_0000277601	3 ketodihydrosphingosine reductase	UniProtKB/TrEMBL	A0A077Z391
193	Trichuris_trichiura_3_002	3560001	3580000	0.46122	3563072	3569262	TTRE_0000277701	Phospholipid-transporting ATPase	UniProtKB/TrEMBL	A0A077Z1X4
194	Trichuris_trichiura_3_002	3580001	3600000	0.517298	3580409	3587854	TTRE_0000277801	Solute carrier family 12	UniProtKB/TrEMBL	A0A077Z4B0
195	Trichuris_trichiura_3_002	3580001	3600000	0.517298	3595140	3600000	TTRE_0000277901	Putative paired box protein Pax-2	UniProtKB/TrEMBL	A0A077Z3S4
196	Trichuris_trichiura_3_002	3600001	3620000	0.504276	3600002	3605290	TTRE_0000277901	Putative paired box protein Pax-2	UniProtKB/TrEMBL	A0A077Z3S4
197	Trichuris_trichiura_3_002	3600001	3620000	0.504276	3608847	3610190	TTRE_0000278001
198	Trichuris_trichiura_3_002	3600001	3620000	0.504276	3612567	3615423	TTRE_0000278101	Non-specific serine/threonine protein kinase	UniProtKB/TrEMBL	A0A077Z395
199	Trichuris_trichiura_3_002	3600001	3620000	0.504276	3615612	3620000	TTRE_0000278201	Chitin synthase	UniProtKB/TrEMBL	A0A077Z1Y1
200	Trichuris_trichiura_3_002	3620001	3640000	0.395725	3620002	3624405	TTRE_0000278201	Chitin synthase	UniProtKB/TrEMBL	A0A077Z1Y1
201	Trichuris_trichiura_3_002	3620001	3640000	0.395725	3625533	3626887	TTRE_0000278301	Brix domain containing protein	UniProtKB/TrEMBL	A0A077Z4B6
202	Trichuris_trichiura_3_002	3620001	3640000	0.395725	3630538	3640000	TTRE_0000278401	GRIP domain-containing protein	UniProtKB/TrEMBL	A0A077Z3S8
203	Trichuris_trichiura_3_002	3640001	3660000	0.384127	3640002	3648622	TTRE_0000278401	GRIP domain-containing protein	UniProtKB/TrEMBL	A0A077Z3S8
204	Trichuris_trichiura_3_002	3640001	3660000	0.384127	3649534	3651280	TTRE_0000978201	Pellino domain containing protein	UniProtKB/TrEMBL	A0A077ZLX4
205	Trichuris_trichiura_3_002	3640001	3660000	0.384127	3655877	3657605	TTRE_0000278601	CAP domain containing protein	UniProtKB/TrEMBL	A0A077Z3A0
206	Trichuris_trichiura_3_002	3720001	3740000	0.422034	3725078	3730850	TTRE_0000610801	RabGAP-TBC and TLD domain containing protein	UniProtKB/TrEMBL	A0A077ZBP7
207	Trichuris_trichiura_3_002	3720001	3740000	0.422034	3732777	3733359	TTRE_0000610901	AP complex subunit sigma	UniProtKB/TrEMBL	A0A077ZE53
208	Trichuris_trichiura_3_002	3720001	3740000	0.422034	3737071	3740000	TTRE_0000728001
209	Trichuris_trichiura_3_002	3760001	3780000	0.347423	3760002	3761163	TTRE_0000593601	Cytosolic non specific dipeptidase	UniProtKB/TrEMBL	A0A077ZDS4
210	Trichuris_trichiura_3_002	3760001	3780000	0.347423	3762985	3775726	TTRE_0000593501	Non-specific serine/threonine protein kinase	UniProtKB/TrEMBL	A0A077ZBB9
211	Trichuris_trichiura_3_002	3760001	3780000	0.347423	3776173	3777768	TTRE_0000593401	Far upstream element-binding protein 1	UniProtKB/TrEMBL	A0A077ZBD0
212	Trichuris_trichiura_3_002	3780001	3800000	0.39327	3780877	3782340	TTRE_0000593301	Tyrosine--tRNA ligase	UniProtKB/TrEMBL	A0A077ZGA9
213	Trichuris_trichiura_3_002	3780001	3800000	0.39327	3786720	3787617	TTRE_0000593201	RNA exonuclease 4	UniProtKB/TrEMBL	A0A077ZCV1
214	Trichuris_trichiura_3_002	3780001	3800000	0.39327	3790378	3791106	TTRE_0000593101	Putative universal minicircle sequence binding pr otein (UMSBP)	UniProtKB/TrEMBL	A0A077ZDS0
215	Trichuris_trichiura_3_002	3780001	3800000	0.39327	3796800	3798637	TTRE_0000593001	PWWP domain containing protein	UniProtKB/TrEMBL	A0A077ZBB7
216	Trichuris_trichiura_3_002	3800001	3820000	0.353933	3806736	3807726	TTRE_0000643801
217	Trichuris_trichiura_3_002	3800001	3820000	0.353933	3813952	3815355	TTRE_0000643701	UAA domain containing protein	UniProtKB/TrEMBL	A0A077ZE98
218	Trichuris_trichiura_3_002	3800001	3820000	0.353933	3815546	3816692	TTRE_0000643601	Epimerase family protein SDR39U1	UniProtKB/TrEMBL	A0A077ZF59
219	Trichuris_trichiura_3_002	3820001	3840000	0.348701	3820002	3820925	TTRE_0000643501	ECIST Cterm and ECSIT domain containing protein	UniProtKB/TrEMBL	A0A077ZCQ6
220	Trichuris_trichiura_3_002	3800001	3820000	0.353933	3819362	3820000	TTRE_0000643501	ECIST Cterm and ECSIT domain containing protein	UniProtKB/TrEMBL	A0A077ZCQ6
221	Trichuris_trichiura_3_002	3820001	3840000	0.348701	3821021	3822346	TTRE_0000643401
222	Trichuris_trichiura_3_002	3820001	3840000	0.348701	3827802	3830490	TTRE_0000643301	Hydrolase	UniProtKB/TrEMBL	A0A077ZHR2
223	Trichuris_trichiura_3_002	3820001	3840000	0.348701	3833383	3839511	TTRE_0000643201	Vitellogenin N and VWD and DUF1943 domain contain ing protein	UniProtKB/TrEMBL	A0A077ZE83
224	Trichuris_trichiura_3_002	3840001	3860000	0.34634	3846181	3847130	TTRE_0000643101	MIF4G domain containing protein	UniProtKB/TrEMBL	A0A077ZF46
225	Trichuris_trichiura_3_002	3840001	3860000	0.34634	3847506	3851107	TTRE_0000643001	Unc 112 related protein	UniProtKB/TrEMBL	A0A077ZCP2
226	Trichuris_trichiura_3_002	3840001	3860000	0.34634	3851382	3851708	TTRE_0000642901	SLA LP auto ag domain containing protein	UniProtKB/TrEMBL	A0A077ZCL6
227	Trichuris_trichiura_3_002	3840001	3860000	0.34634	3855857	3860000	TTRE_0000872601	O-phosphoseryl-tRNA(Sec) selenium transferase	UniProtKB/TrEMBL	A0A077ZIW7
228	Trichuris_trichiura_3_002	3860001	3880000	0.371854	3860002	3860489	TTRE_0000872601	O-phosphoseryl-tRNA(Sec) selenium transferase	UniProtKB/TrEMBL	A0A077ZIW7
229	Trichuris_trichiura_3_002	3860001	3880000	0.371854	3865684	3870475	TTRE_0000864001	Reverse transcriptase family protein	UniProtKB/TrEMBL	A0A077ZNL6
230	Trichuris_trichiura_3_002	3880001	3900000	0.384667	3897790	3900000	TTRE_0000531501	Putative phospholipase d3 protein	UniProtKB/TrEMBL	A0A077Z996
231	Trichuris_trichiura_3_002	3900001	3920000	0.412491	3900002	3903661	TTRE_0000531501	Putative phospholipase d3 protein	UniProtKB/TrEMBL	A0A077Z996
232	Trichuris_trichiura_3_002	3900001	3920000	0.412491	3906378	3908841	TTRE_0000531401
233	Trichuris_trichiura_3_002	3900001	3920000	0.412491	3914543	3914789	TTRE_0000531301
234	Trichuris_trichiura_3_002	3900001	3920000	0.412491	3914790	3920000	TTRE_0000531201
235	Trichuris_trichiura_3_002	3920001	3940000	0.401084	3920002	3923561	TTRE_0000531201
236	Trichuris_trichiura_3_002	3920001	3940000	0.401084	3924821	3925894	TTRE_0000531101	Collagen and Col cuticle N domain containing prot ein	UniProtKB/TrEMBL	A0A077ZBX4
237	Trichuris_trichiura_3_002	3940001	3960000	0.38334	3940002	3941946	TTRE_0000531001	Dynein heavy domain containing protein	UniProtKB/TrEMBL	A0A077Z991
238	Trichuris_trichiura_3_002	3920001	3940000	0.401084	3938755	3940000	TTRE_0000531001	Dynein heavy domain containing protein	UniProtKB/TrEMBL	A0A077Z991
239	Trichuris_trichiura_3_002	3940001	3960000	0.38334	3941836	3960000	TTRE_0000570601	Dynein heavy chain	UniProtKB/TrEMBL	A0A077ZC40
240	Trichuris_trichiura_3_002	3960001	3980000	0.375749	3960002	3962540	TTRE_0000570601	Dynein heavy chain	UniProtKB/TrEMBL	A0A077ZC40
241	Trichuris_trichiura_3_002	3960001	3980000	0.375749	3967025	3967774	TTRE_0000570701	HLH domain containing protein	UniProtKB/TrEMBL	A0A077ZFH7
242	Trichuris_trichiura_3_002	3960001	3980000	0.375749	3970810	3973264	TTRE_0000570801	Zinc metalloproteinase	UniProtKB/TrEMBL	A0A077ZAU4
243	Trichuris_trichiura_3_002	4100001	4120000	0.365721	4104916	4106860	TTRE_0000582601	Tetraspanin	UniProtKB/TrEMBL	A0A077ZCG0
244	Trichuris_trichiura_3_002	4120001	4140000	0.410657	4133579	4135264	TTRE_0000734601	Ctp synthase	UniProtKB/TrEMBL	A0A077ZF67
245	Trichuris_trichiura_3_002	4180001	4200000	0.371929	4190156	4193191	TTRE_0000701301	5' 3' exoribonuclease 1	UniProtKB/TrEMBL	A0A077ZGF5
246	Trichuris_trichiura_3_002	4200001	4220000	0.440798	4205221	4206058	TTRE_0000765501
247	Trichuris_trichiura_3_002	4200001	4220000	0.440798	4214839	4215229	TTRE_0000765401	Armadillo repeat-containing protein 6	UniProtKB/TrEMBL	A0A077ZG09
248	Trichuris_trichiura_3_002	4220001	4240000	0.379675	4229768	4230323	TTRE_0000951001
249	Trichuris_trichiura_3_002	4220001	4240000	0.379675	4238937	4240000	TTRE_0000938001	TAFII28 and Ribosomal L11 N and Ribosomal L11 dom ain containing protein	UniProtKB/TrEMBL	A0A077ZKU5
250	Trichuris_trichiura_3_002	4240001	4260000	0.376465	4240002	4240633	TTRE_0000938001	TAFII28 and Ribosomal L11 N and Ribosomal L11 dom ain containing protein	UniProtKB/TrEMBL	A0A077ZKU5
251	Trichuris_trichiura_3_002	4240001	4260000	0.376465	4253085	4253537	TTRE_0000726701	Mitochondrial polypeptide chain release factor	UniProtKB/TrEMBL	A0A077ZGZ1
252	Trichuris_trichiura_3_002	4240001	4260000	0.376465	4254667	4256139	TTRE_0000726801
253	Trichuris_trichiura_3_002	4240001	4260000	0.376465	4258062	4258422	TTRE_0000726901
254	Trichuris_trichiura_3_002	4260001	4280000	0.36869	4272365	4272535	TTRE_0000698801
255	Trichuris_trichiura_3_002	4260001	4280000	0.36869	4276924	4280000	TTRE_0000708901	Polypeptide N-acetylgalactosaminyltransferase	UniProtKB/TrEMBL	A0A077ZG42
256	Trichuris_trichiura_3_002	4280001	4300000	0.381933	4280002	4286172	TTRE_0000708901	Polypeptide N-acetylgalactosaminyltransferase	UniProtKB/TrEMBL	A0A077ZG42
257	Trichuris_trichiura_3_002	4280001	4300000	0.381933	4291763	4295870	TTRE_0000708801
258	Trichuris_trichiura_3_002	4300001	4320000	0.393243	4301327	4307856	TTRE_0000708701
259	Trichuris_trichiura_3_002	4320001	4340000	0.433791	4321420	4322063	TTRE_0000887801	HTH Tnp Tc5 and BrkDBD domain containing protein	UniProtKB/TrEMBL	A0A077ZJC3
260	Trichuris_trichiura_3_002	4320001	4340000	0.433791	4327687	4328667	TTRE_0000585001	Ribosome biogenesis regulatory protein	UniProtKB/TrEMBL	A0A077ZDC7
261	Trichuris_trichiura_3_002	4340001	4360000	0.448112	4341814	4344021	TTRE_0000585101	Acyl-CoA:lysophosphatidylglycerol acyltransferase 1	UniProtKB/TrEMBL	A0A077ZCI5
262	Trichuris_trichiura_3_002	4340001	4360000	0.448112	4344579	4358533	TTRE_0000585201	Striatin 3	UniProtKB/TrEMBL	A0A077ZFY1
263	Trichuris_trichiura_3_002	4360001	4380000	0.425754	4363242	4370573	TTRE_0000695601	Striatin domain containing protein	UniProtKB/TrEMBL	A0A077ZE58
264	Trichuris_trichiura_3_002	4360001	4380000	0.425754	4371093	4374931	TTRE_0000695501	DUF89 domain containing protein	UniProtKB/TrEMBL	A0A077ZE66
265	Trichuris_trichiura_3_002	4380001	4400000	0.414002	4380242	4380439	TTRE_0000695401
266	Trichuris_trichiura_3_002	4380001	4400000	0.414002	4394046	4394759	TTRE_0000695301	Putative phosphatidylinositol kinase related prot ein	UniProtKB/TrEMBL	A0A077ZFN9
267	Trichuris_trichiura_3_002	4400001	4420000	0.436809	4400034	4401683	TTRE_0000928601
268	Trichuris_trichiura_3_002	4400001	4420000	0.436809	4401828	4404421	TTRE_0000518801
269	Trichuris_trichiura_3_002	4400001	4420000	0.436809	4414327	4414536	TTRE_0000518701
270	Trichuris_trichiura_3_002	4420001	4440000	0.387507	4437467	4438698	TTRE_0000518601	Zf-HIT domain containing protein	UniProtKB/TrEMBL	A0A077ZBE9
271	Trichuris_trichiura_3_002	4440001	4460000	0.396928	4449299	4453574	TTRE_0000518501	RNase H2-Ydr279 domain containing protein	UniProtKB/TrEMBL	A0A077Z8V2
272	Trichuris_trichiura_3_002	4440001	4460000	0.396928	4453773	4455296	TTRE_0000518401	RNA recognition motif protein	UniProtKB/TrEMBL	A0A077Z9K1
273	Trichuris_trichiura_3_002	4440001	4460000	0.396928	4456681	4457678	TTRE_0000518301
274	Trichuris_trichiura_3_002	4460001	4480000	0.440064	4469353	4470885	TTRE_0000466201	Mitogen-activated protein kinase	UniProtKB/TrEMBL	A0A077ZCP4
275	Trichuris_trichiura_3_002	4460001	4480000	0.440064	4476663	4479302	TTRE_0000466301	PET and LIM domain containing protein	UniProtKB/TrEMBL	A0A077Z840
276	Trichuris_trichiura_3_002	4500001	4520000	0.405259	4516734	4517059	TTRE_0000466501
277	Trichuris_trichiura_3_002	4520001	4540000	0.35126	4521909	4522232	TTRE_0000868301	Ribosomal protein L37	UniProtKB/TrEMBL	A0A077ZIT2
278	Trichuris_trichiura_3_002	4520001	4540000	0.35126	4522816	4525014	TTRE_0000868201	Helicase C and SUV3 C domain containing protein	UniProtKB/TrEMBL	A0A077ZNP9
279	Trichuris_trichiura_3_002	4520001	4540000	0.35126	4525736	4527527	TTRE_0000868101
280	Trichuris_trichiura_3_002	4520001	4540000	0.35126	4530811	4531696	TTRE_0000942701	RT_RNaseH_2 domain-containing protein	UniProtKB/TrEMBL	A0A077ZQG9
281	Trichuris_trichiura_3_002	4540001	4560000	0.407354	4540071	4541904	TTRE_0000697601	Pkinase domain containing protein	UniProtKB/TrEMBL	A0A077ZE67
282	Trichuris_trichiura_3_002	4540001	4560000	0.407354	4544251	4544601	TTRE_0000697501
283	Trichuris_trichiura_3_002	4540001	4560000	0.407354	4557245	4557998	TTRE_0000697401
284	Trichuris_trichiura_3_002	4560001	4580000	0.396868	4561042	4565522	TTRE_0000697301	Arm and fn3 domain containing protein	UniProtKB/TrEMBL	A0A077ZFS1
285	Trichuris_trichiura_3_002	4560001	4580000	0.396868	4575581	4576409	TTRE_0000607801
286	Trichuris_trichiura_3_002	4580001	4600000	0.435841	4581803	4582924	TTRE_0000607701	FMRFamide receptor	UniProtKB/TrEMBL	A0A077ZBN2
287	Trichuris_trichiura_3_002	4580001	4600000	0.435841	4589168	4589515	TTRE_0000607601
288	Trichuris_trichiura_3_002	4600001	4620000	0.377385	4601724	4605810	TTRE_0000607501	Homeobox domain containing protein	UniProtKB/TrEMBL	A0A077ZD67
289	Trichuris_trichiura_3_002	4600001	4620000	0.377385	4607500	4607941	TTRE_0000607401
290	Trichuris_trichiura_3_002	4640001	4660000	0.395197	4646762	4648106	TTRE_0000752801	Ribokinase	UniProtKB/TrEMBL	A0A077ZI00
291	Trichuris_trichiura_3_002	4660001	4680000	0.418332	4671124	4680000	TTRE_0000626301	Protein kcc	UniProtKB/TrEMBL	A0A077ZC29
292	Trichuris_trichiura_3_002	4680001	4700000	0.39012	4680002	4683975	TTRE_0000626301	Protein kcc	UniProtKB/TrEMBL	A0A077ZC29
293	Trichuris_trichiura_3_002	4680001	4700000	0.39012	4699378	4700000	TTRE_0000626201
294	Trichuris_trichiura_3_002	4720001	4740000	0.412102	4720002	4722711	TTRE_0000863801
295	Trichuris_trichiura_3_002	4720001	4740000	0.412102	4723432	4726941	TTRE_0000863901
296	Trichuris_trichiura_3_002	4720001	4740000	0.412102	4732751	4734883	TTRE_0000799201	LIM domain containing protein	UniProtKB/TrEMBL	A0A077ZIU8
297	Trichuris_trichiura_3_002	4740001	4760000	0.340871	4741058	4745474	TTRE_0000799301
298	Trichuris_trichiura_3_002	4740001	4760000	0.340871	4749074	4759112	TTRE_0000833901
299	Trichuris_trichiura_3_002	4840001	4860000	0.344783	4846850	4847414	TTRE_0000520101	TPR Domain containing protein	UniProtKB/TrEMBL	A0A077ZBH4
300	Trichuris_trichiura_3_002	4840001	4860000	0.344783	4856318	4857025	TTRE_0000520001	TPR 11 domain containing protein	UniProtKB/TrEMBL	A0A077Z8W3
301	Trichuris_trichiura_3_002	4860001	4880000	0.369059	4860002	4863009	TTRE_0000519901	TFCD C domain containing protein	UniProtKB/TrEMBL	A0A077Z9L9
302	Trichuris_trichiura_3_002	4840001	4860000	0.344783	4859412	4860000	TTRE_0000519901	TFCD C domain containing protein	UniProtKB/TrEMBL	A0A077Z9L9
303	Trichuris_trichiura_3_002	4860001	4880000	0.369059	4868815	4871228	TTRE_0000519801	Inosine-5'-monophosphate dehydrogenase	UniProtKB/TrEMBL	A0A077ZE22
304	Trichuris_trichiura_3_002	4860001	4880000	0.369059	4871738	4874419	TTRE_0000519701	Dolichyl-diphosphooligosaccharide--protein glycosyltransferase subunit 1	UniProtKB/TrEMBL	A0A077ZAR6
305	Trichuris_trichiura_3_002	4860001	4880000	0.369059	4875666	4877848	TTRE_0000519601	Methionine aminopeptidase 2	UniProtKB/TrEMBL	A0A077ZBG5
306	Trichuris_trichiura_3_002	4860001	4880000	0.369059	4877945	4880000	TTRE_0000519501	Fn3 and I-set and Ig 2 domain containing protein	UniProtKB/TrEMBL	A0A077Z8W1
307	Trichuris_trichiura_3_002	4960001	4980000	0.340946	4960002	4963705	TTRE_0000623401	Ras specific guanine nucleotide releasing factor	UniProtKB/TrEMBL	A0A077ZDM1
308	Trichuris_trichiura_3_002	4960001	4980000	0.340946	4964034	4965224	TTRE_0000623301
309	Trichuris_trichiura_3_002	4960001	4980000	0.340946	4966572	4968507	TTRE_0000623201	Helicase SKI2W	UniProtKB/TrEMBL	A0A077ZC05
310	Trichuris_trichiura_3_002	4960001	4980000	0.340946	4967244	4968752	TTRE_0000623101
311	Trichuris_trichiura_3_002	4960001	4980000	0.340946	4973952	4980000	TTRE_0000622901	Helicase C and DEAD and DSHCT domain containing p rotein	UniProtKB/TrEMBL	A0A077ZDL4
312	Trichuris_trichiura_3_002	4980001	5000000	0.347953	4980002	4984746	TTRE_0000622901	Helicase C and DEAD and DSHCT domain containing p rotein	UniProtKB/TrEMBL	A0A077ZDL4
313	Trichuris_trichiura_3_002	4960001	4980000	0.340946	4979976	4980000	TTRE_0000623001
314	Trichuris_trichiura_3_002	4980001	5000000	0.347953	4980002	4980287	TTRE_0000623001
315	Trichuris_trichiura_3_002	4980001	5000000	0.347953	4988554	4989881	TTRE_0000622801	ADK domain containing protein	UniProtKB/TrEMBL	A0A077ZEG3
316	Trichuris_trichiura_3_002	4980001	5000000	0.347953	4990216	4991446	TTRE_0000622701	Adenylate kinase isoenzyme 1	UniProtKB/TrEMBL	A0A077ZC00
317	Trichuris_trichiura_3_002	4980001	5000000	0.347953	4991901	4993441	TTRE_0000622601	Endophilin protein 1, b	UniProtKB/TrEMBL	A0A077ZC07
318	Trichuris_trichiura_3_002	4980001	5000000	0.347953	4993589	4994545	TTRE_0000622501	Hep 59 domain containing protein	UniProtKB/TrEMBL	A0A077ZH18
319	Trichuris_trichiura_3_002	4980001	5000000	0.347953	4995022	4995719	TTRE_0000622401	40S ribosomal protein S18	UniProtKB/TrEMBL	A0A077ZDK7
320	Trichuris_trichiura_3_002	5020001	5040000	0.364442	5022703	5025558	TTRE_0000855001
321	Trichuris_trichiura_3_002	5020001	5040000	0.364442	5032190	5033260	TTRE_0000816301	Translation initiation factor eIF 2B subunit	UniProtKB/TrEMBL	A0A077ZHH5
322	Trichuris_trichiura_3_002	5020001	5040000	0.364442	5033477	5034053	TTRE_0000816201	Nuclear transcription factor Y subunit beta	UniProtKB/TrEMBL	A0A077ZHL5
323	Trichuris_trichiura_3_002	5020001	5040000	0.364442	5035382	5036144	TTRE_0000816101	ADP ribosylation factor 4	UniProtKB/TrEMBL	A0A077ZMD1
324	Trichuris_trichiura_3_002	5020001	5040000	0.364442	5036613	5037781	TTRE_0000816001	His Phos 1 domain containing protein	UniProtKB/TrEMBL	A0A077ZJA4
325	Trichuris_trichiura_3_002	5080001	5100000	0.344737	5095592	5097425	TTRE_0000734401	Protein aurora borealis	UniProtKB/TrEMBL	A0A077ZK59
326	Trichuris_trichiura_3_002	5080001	5100000	0.344737	5099776	5100000	TTRE_0000734301	PH and FYVE domain containing protein	UniProtKB/TrEMBL	A0A077ZGS2
327	Trichuris_trichiura_3_002	5100001	5120000	0.363583	5100002	5101279	TTRE_0000734301	PH and FYVE domain containing protein	UniProtKB/TrEMBL	A0A077ZGS2
328	Trichuris_trichiura_3_002	5100001	5120000	0.363583	5103444	5104022	TTRE_0000734201	RRM 1 domain containing protein	UniProtKB/TrEMBL	A0A077ZH67
329	Trichuris_trichiura_3_002	5100001	5120000	0.363583	5108458	5112907	TTRE_0000804301	HMG box domain containing protein	UniProtKB/TrEMBL	A0A077ZM54
330	Trichuris_trichiura_3_002	5100001	5120000	0.363583	5116452	5117037	TTRE_0000804401	Ribosom S12 S23 domain containing protein	UniProtKB/TrEMBL	A0A077ZHD1
331	Trichuris_trichiura_3_002	5120001	5140000	0.456179	5120838	5121509	TTRE_0000983701	Zinc knuckle protein	UniProtKB/TrEMBL	A0A077ZNH4
332	Trichuris_trichiura_3_002	5120001	5140000	0.456179	5130422	5133357	TTRE_0000515101	Protein rme isoform c protein rme isoform b pro tein rme isoform a	UniProtKB/TrEMBL	A0A077ZBA9
333	Trichuris_trichiura_3_002	5120001	5140000	0.456179	5133901	5135776	TTRE_0000515001	EF-hand 4 domain containing protein	UniProtKB/TrEMBL	A0A077Z8S2
334	Trichuris_trichiura_3_002	5120001	5140000	0.456179	5137129	5137777	TTRE_0000514901	L51 S25 CI-B8 domain containing protein	UniProtKB/TrEMBL	A0A077Z9G5
335	Trichuris_trichiura_3_002	5120001	5140000	0.456179	5139170	5140000	TTRE_0000514801	Calcineurin subunit B type 1	UniProtKB/TrEMBL	A0A077ZDX2
336	Trichuris_trichiura_3_002	5160001	5180000	0.34146	5160002	5161113	TTRE_0000514401	Histone-lysine N-methyltransferase SETMAR	UniProtKB/TrEMBL	A0A077Z9F9
337	Trichuris_trichiura_3_002	5160001	5180000	0.34146	5166366	5174696	TTRE_0000514301	NACHT domain containing protein	UniProtKB/TrEMBL	A0A077ZDW7
338	Trichuris_trichiura_3_002	5180001	5200000	0.342381	5183724	5184625	TTRE_0000514201
339	Trichuris_trichiura_3_002	5180001	5200000	0.342381	5185110	5189837	TTRE_0000514101	WD40 domain containing protein	UniProtKB/TrEMBL	A0A077ZBA1
340	Trichuris_trichiura_3_002	5180001	5200000	0.342381	5197343	5198510	TTRE_0000764501	CECR6 TMEM121 domain containing protein	UniProtKB/TrEMBL	A0A077ZIA5
341	Trichuris_trichiura_3_002	5180001	5200000	0.342381	5199929	5200000	TTRE_0000764401	TIM21 domain containing protein	UniProtKB/TrEMBL	A0A077ZFZ9
342	Trichuris_trichiura_3_002	5200001	5220000	0.349405	5200002	5200968	TTRE_0000764401	TIM21 domain containing protein	UniProtKB/TrEMBL	A0A077ZFZ9
343	Trichuris_trichiura_3_002	5200001	5220000	0.349405	5201347	5210952	TTRE_0000764201	Copine 8	UniProtKB/TrEMBL	A0A077ZL23
344	Trichuris_trichiura_3_002	5200001	5220000	0.349405	5204929	5206001	TTRE_0000764301
345	Trichuris_trichiura_3_002	5260001	5280000	0.367036	5260378	5260683	TTRE_0000859501
346	Trichuris_trichiura_3_002	5260001	5280000	0.367036	5272748	5273866	TTRE_0000875801	Poly(U) specific endoribonuclease	UniProtKB/TrEMBL	A0A077ZIZ5
347	Trichuris_trichiura_3_002	5260001	5280000	0.367036	5279827	5280000	TTRE_0000875901
348	Trichuris_trichiura_3_002	5280001	5300000	0.341314	5280002	5280117	TTRE_0000875901
349	Trichuris_trichiura_3_002	5280001	5300000	0.341314	5284959	5287049	TTRE_0000857901	SRR1 and Ribosomal L2 C domain containing protein	UniProtKB/TrEMBL	A0A077ZNH1
350	Trichuris_trichiura_3_002	5280001	5300000	0.341314	5287664	5288137	TTRE_0000857801	eIF-1a domain containing protein	UniProtKB/TrEMBL	A0A077ZKD6
351	Trichuris_trichiura_3_002	5280001	5300000	0.341314	5298321	5299812	TTRE_0000806301	3 ketoacyl coenzyme A thiolase, mitochondrial	UniProtKB/TrEMBL	A0A077ZJA3
352	Trichuris_trichiura_3_002	5280001	5300000	0.341314	5299950	5300000	TTRE_0000806201	Integrator complex subunit 11	UniProtKB/TrEMBL	A0A077ZHA0
353	Trichuris_trichiura_3_002	5320001	5340000	0.361452	5320002	5321625	TTRE_0000948101	Eukaryotic translation initiation factor 3 subunit B	UniProtKB/TrEMBL	A0A077ZMT3
354	Trichuris_trichiura_3_002	5320001	5340000	0.361452	5325043	5331256	TTRE_0000797201	Nucleolar protein 6	UniProtKB/TrEMBL	A0A077ZIT1
355	Trichuris_trichiura_3_002	5320001	5340000	0.361452	5332313	5333635	TTRE_0000797101	Autophagy-related protein 9	UniProtKB/TrEMBL	A0A077ZJ52
356	Trichuris_trichiura_3_002	5340001	5360000	0.430905	5355451	5355687	TTRE_0000924201
357	Trichuris_trichiura_3_002	5360001	5380000	0.38997	5369783	5370664	TTRE_0000929401	Autophagy-related protein 9	UniProtKB/TrEMBL	A0A077ZQ55
358	Trichuris_trichiura_3_002	5360001	5380000	0.38997	5377685	5378187	TTRE_0000926101
359	Trichuris_trichiura_3_002	5400001	5420000	0.354501	5400002	5400444	TTRE_0000967801	Zf-H2C2 and rve domain containing protein	UniProtKB/TrEMBL	A0A077ZNF0
360	Trichuris_trichiura_3_002	5400001	5420000	0.354501	5412603	5414200	TTRE_0000602001	Zf-CCHC domain containing protein	UniProtKB/TrEMBL	A0A077ZGJ4
361	Trichuris_trichiura_3_002	5480001	5500000	0.342162	5486652	5491229	TTRE_0000601701	Peptidase A17 and DUF1759 and DUF1758 domain cont aining protein	UniProtKB/TrEMBL	A0A077ZDY5
362	Trichuris_trichiura_3_002	5480001	5500000	0.342162	5491318	5492116	TTRE_0000870401	DUF5641 domain-containing protein	UniProtKB/TrEMBL	A0A077ZIU6
363	Trichuris_trichiura_3_002	5480001	5500000	0.342162	5497206	5497466	TTRE_0000870301
364	Trichuris_trichiura_3_002	5500001	5520000	0.347293	5517493	5519451	TTRE_0000929301	DUF1759 and DUF1758 domain containing protein	UniProtKB/TrEMBL	A0A077ZMB1
365	Trichuris_trichiura_3_003	1560001	1580000	0.449089	1564373	1567345	TTRE_0000190501	Isovaleryl coenzyme A dehydrogenase	UniProtKB/TrEMBL	A0A077Z4N9
366	Trichuris_trichiura_3_003	1560001	1580000	0.449089	1568309	1569001	TTRE_0000190401	NUDIX domain containing protein	UniProtKB/TrEMBL	A0A077Z122
367	Trichuris_trichiura_3_003	1560001	1580000	0.449089	1571757	1573972	TTRE_0000931301	Putative cytochrome b5	UniProtKB/TrEMBL	A0A077ZMC9
368	Trichuris_trichiura_3_003	1580001	1600000	0.377792	1595299	1595498	TTRE_0000707701	DUF5641 domain-containing protein	UniProtKB/TrEMBL	A0A077ZEF3
369	Trichuris_trichiura_3_005	260001	280000	0.42458	272871	275872	TTRE_0000163001
370	Trichuris_trichiura_3_005	260001	280000	0.42458	277917	279028	TTRE_0000163101
371	Trichuris_trichiura_3_005	280001	300000	0.595531	287329	294654	TTRE_0000163201	Voltage-dependent L-type calcium channel subunit alpha	UniProtKB/TrEMBL	A0A077Z0W2
372	Trichuris_trichiura_3_006	460001	480000	0.431706	460002	461178	TTRE_0000847601	Kringle domain containing protein	UniProtKB/TrEMBL	A0A077ZKA1
373	Trichuris_trichiura_3_006	460001	480000	0.431706	469029	469839	TTRE_0000921201	Kringle domain containing protein	UniProtKB/TrEMBL	A0A077ZM36
