# Supplementary material for: Population genomics of ancient and modern Trichuris trichiura
Source: Nat Commun. 2022 Jul 6;13:3888. doi: 10.1038/s41467-022-31487-x (PMC9259628; doi:10.1038/s41467-022-31487-x)
Supplement: Supplementary file 7 — Supplementary Data 4 [file 41467_2022_31487_MOESM7_ESM.xlsx]

## Sheet: Sheet1
COUNT	CHROMSOME	BIN_START	BIN_END	WEIGHTED_FST	GENE_START	GENE_END	GENE_ID	INTERPROSCAN_DESCRIPTION	INTERPROSCAN_SOURCE	INTERPROSCAN_SOURCE_ACCESSION
1	Trichuris_trichiura_00_001	580001	600000	0.959305	586516	589714	TTRE_0000644201	DUF1758 and DUF1759 and RVT 1 and Peptidase A17 d omain containing protein	UniProtKB/TrEMBL	A0A077ZEA3
2	Trichuris_trichiura_00_001	660001	680000	0.881039	674134	675613	TTRE_0000141501	Proton_antipo_M domain-containing protein	UniProtKB/TrEMBL	A0A077YYM7
3	Trichuris_trichiura_00_001	660001	680000	0.881039	679573	680000	TTRE_0000934001	NADH dehydrogenase subunit 5	UniProtKB/TrEMBL	A0A077ZQ97
4	Trichuris_trichiura_00_001	1120001	1140000	0.726764	1124131	1125310	TTRE_0000644901
5	Trichuris_trichiura_00_001	1160001	1180000	0.75607	1160002	1160883	TTRE_0000970301	Zinc knuckle protein	UniProtKB/TrEMBL	A0A077ZLM7
6	Trichuris_trichiura_00_001	1280001	1300000	0.703687	1288492	1289044	TTRE_0000969101
7	Trichuris_trichiura_00_002	200001	220000	0.865818	202085	202753	TTRE_0000886401	Major sperm protein	UniProtKB/TrEMBL	A0A077ZL72
8	Trichuris_trichiura_00_002	240001	260000	0.712007	244655	245074	TTRE_0000984601
9	Trichuris_trichiura_00_002	480001	500000	0.812908	486883	487248	TTRE_0000952201	Pao retrotransposon peptidase superfamily	UniProtKB/TrEMBL	A0A077ZQP7
10	Trichuris_trichiura_00_002	480001	500000	0.812908	487339	487707	TTRE_0000952101	Zinc knuckle protein	UniProtKB/TrEMBL	A0A077ZMX1
11	Trichuris_trichiura_00_012	40001	60000	0.797227	57888	59059	TTRE_0000621601
12	Trichuris_trichiura_1_001	500001	520000	0.81986	506168	513117	TTRE_0000249601	Zinc finger homeobox protein 3	UniProtKB/TrEMBL	A0A077Z2H2
13	Trichuris_trichiura_1_001	500001	520000	0.81986	506434	506679	TTRE_0000249501
14	Trichuris_trichiura_1_001	7860001	7880000	0.731547	7864927	7866175	TTRE_0000562501	Class A rhodopsin-like G-protein coupled receptor GPRfmr	UniProtKB/TrEMBL	A0A077ZBX6
15	Trichuris_trichiura_1_001	7860001	7880000	0.731547	7869062	7870800	TTRE_0000562401	tRNA modification GTPase GTPBP3, mitochondrial	UniProtKB/TrEMBL	A0A077ZCQ4
16	Trichuris_trichiura_1_001	7880001	7900000	0.884106	7889235	7896875	TTRE_0000562701	Protein tag isoform	UniProtKB/TrEMBL	A0A077ZAN4
17	Trichuris_trichiura_1_001	7880001	7900000	0.884106	7897755	7899176	TTRE_0000562601
18	Trichuris_trichiura_1_001	7900001	7920000	0.748341	7911810	7913003	TTRE_0000287301
19	Trichuris_trichiura_1_001	8140001	8160000	0.704817	8144846	8153168	TTRE_0000243001	Ski protein like	UniProtKB/TrEMBL	A0A077Z671
20	Trichuris_trichiura_1_001	8240001	8260000	0.704187	8240425	8256348	TTRE_0000242201	Epidermal growth factor receptor	UniProtKB/TrEMBL	A0A077Z161
21	Trichuris_trichiura_1_001	9200001	9220000	0.745275	9215831	9216621	TTRE_0000178701	DB domain containing protein	UniProtKB/TrEMBL	A0A077YZI5
22	Trichuris_trichiura_1_001	10420001	10440000	0.724026	10421573	10422166	TTRE_0000610501	Ras domain containing protein	UniProtKB/TrEMBL	A0A077ZD94
23	Trichuris_trichiura_1_001	10560001	10580000	0.685343	10569515	10570801	TTRE_0000673901	Calponin family protein	UniProtKB/TrEMBL	A0A077ZFT7
24	Trichuris_trichiura_1_002	4500001	4520000	0.685446	4502574	4505829	TTRE_0000393501	Tyrosine-protein kinase	UniProtKB/TrEMBL	A0A077Z5F3
25	Trichuris_trichiura_1_002	4500001	4520000	0.685446	4507213	4509080	TTRE_0000393601	28S ribosomal protein S27, mitochondrial	UniProtKB/TrEMBL	A0A077Z7T4
26	Trichuris_trichiura_1_002	4500001	4520000	0.685446	4510042	4511213	TTRE_0000393701	Charged multivesicular body protein 4b	UniProtKB/TrEMBL	A0A077Z7D9
27	Trichuris_trichiura_1_002	4500001	4520000	0.685446	4515109	4515363	TTRE_0000670801
28	Trichuris_trichiura_1_002	4500001	4520000	0.685446	4515647	4519670	TTRE_0000670701	Zip domain containing protein	UniProtKB/TrEMBL	A0A077ZDF8
29	Trichuris_trichiura_1_002	4520001	4540000	0.688608	4520410	4521237	TTRE_0000670601	PH domain containing protein	UniProtKB/TrEMBL	A0A077ZDC6
30	Trichuris_trichiura_1_002	4520001	4540000	0.688608	4526633	4534764	TTRE_0000670501	Eukaryotic translation initiation factor 4	UniProtKB/TrEMBL	A0A077ZIG8
31	Trichuris_trichiura_1_002	4520001	4540000	0.688608	4538734	4540000	TTRE_0000670401	Dual specificity protein phosphatase 16	UniProtKB/TrEMBL	A0A077ZEV8
32	Trichuris_trichiura_1_002	4880001	4900000	0.686166	4882590	4883468	TTRE_0000003401	Acyl protein thioesterase	UniProtKB/TrEMBL	A0A077YZG1
33	Trichuris_trichiura_1_002	4920001	4940000	0.707067	4931907	4937515	TTRE_0000003901	Sodium/hydrogen exchanger	UniProtKB/TrEMBL	A0A077YZG5
34	Trichuris_trichiura_1_002	5000001	5020000	0.730884	5000002	5003322	TTRE_0000004101	Tubby-like protein	UniProtKB/TrEMBL	A0A077YUM5
35	Trichuris_trichiura_1_002	5000001	5020000	0.730884	5009497	5014174	TTRE_0000004201
36	Trichuris_trichiura_1_002	5000001	5020000	0.730884	5018269	5020000	TTRE_0000004301	Cuticlin 1	UniProtKB/TrEMBL	A0A077YVL6
37	Trichuris_trichiura_1_004	280001	300000	0.701802	294586	295735	TTRE_0000967601	C2H2-type domain-containing protein	UniProtKB/TrEMBL	A0A077ZLN8
38	Trichuris_trichiura_1_004	1240001	1260000	0.680827	1240002	1240894	TTRE_0000506201	Transporter, major facilitator family	UniProtKB/TrEMBL	A0A077ZDP2
39	Trichuris_trichiura_1_004	1240001	1260000	0.680827	1252846	1254359	TTRE_0000506101	Ubiquinol cytochrome c reductase, cytochrome c1	UniProtKB/TrEMBL	A0A077ZAF0
40	Trichuris_trichiura_1_004	1280001	1300000	0.709582	1281021	1281586	TTRE_0000575801	Carm_PH domain-containing protein	UniProtKB/TrEMBL	A0A077ZAY3
41	Trichuris_trichiura_1_004	1280001	1300000	0.709582	1298247	1298912	TTRE_0000575701	G_PROTEIN_RECEP_F1_2 domain-containing protein	UniProtKB/TrEMBL	A0A077ZFL8
42	Trichuris_trichiura_1_004	1300001	1320000	0.702995	1307603	1308199	TTRE_0000575601	DUF2036 domain containing protein	UniProtKB/TrEMBL	A0A077ZC85
43	Trichuris_trichiura_1_004	1300001	1320000	0.702995	1310793	1316962	TTRE_0000575501	Protein CUTL 11	UniProtKB/TrEMBL	A0A077ZD32
44	Trichuris_trichiura_1_004	1320001	1340000	0.711266	1322632	1323841	TTRE_0000575401	EF-hand 4 and MCLC and MMR HSR1 domain containing protein	UniProtKB/TrEMBL	A0A077ZAQ6
45	Trichuris_trichiura_1_006	80001	100000	0.797187	88050	94975	TTRE_0000616301	EST1 DNA bind and PIN 4 domain containing protein	UniProtKB/TrEMBL	A0A077ZBV4
46	Trichuris_trichiura_1_006	100001	120000	0.764796	101110	104505	TTRE_0000616201	Probable NADH dehydrogenase [ubiquinone] 1 beta s ubcomplex subunit 2, mitochondrial	UniProtKB/TrEMBL	A0A077ZGW1
47	Trichuris_trichiura_1_006	140001	160000	0.75289	140002	150879	TTRE_0000602701	WD40 and TLE N domain containing protein	UniProtKB/TrEMBL	A0A077ZBH1
48	Trichuris_trichiura_1_006	120001	140000	0.76897	138746	140000	TTRE_0000602701	WD40 and TLE N domain containing protein	UniProtKB/TrEMBL	A0A077ZBH1
49	Trichuris_trichiura_1_006	160001	180000	0.804235	167571	168424	TTRE_0000602801	Homeobox protein goosecoid A	UniProtKB/TrEMBL	A0A077ZDZ5
50	Trichuris_trichiura_1_006	200001	220000	0.680129	202389	203279	TTRE_0000674901	Headcase protein	UniProtKB/TrEMBL	A0A077ZF02
51	Trichuris_trichiura_1_006	200001	220000	0.680129	214974	216357	TTRE_0000913401	26S proteasome non ATPase regulatory subunit 7	UniProtKB/TrEMBL	A0A077ZK69
52	Trichuris_trichiura_1_006	200001	220000	0.680129	217232	218342	TTRE_0000913501	ATP synthase subunit alpha	UniProtKB/TrEMBL	A0A077ZLW3
53	Trichuris_trichiura_1_006	220001	240000	0.741773	225000	226407	TTRE_0000737201	ATP synthase subunit alpha	UniProtKB/TrEMBL	A0A077ZF69
54	Trichuris_trichiura_1_006	220001	240000	0.741773	230792	240000	TTRE_0000737301	Protein polybromo 1	UniProtKB/TrEMBL	A0A077ZHD0
55	Trichuris_trichiura_1_006	240001	260000	0.772286	240002	244097	TTRE_0000737301	Protein polybromo 1	UniProtKB/TrEMBL	A0A077ZHD0
56	Trichuris_trichiura_1_006	240001	260000	0.772286	255123	256223	TTRE_0000714101	PWI domain containing protein	UniProtKB/TrEMBL	A0A077ZEP1
57	Trichuris_trichiura_1_006	260001	280000	0.782492	261425	262215	TTRE_0000714201
58	Trichuris_trichiura_1_006	260001	280000	0.782492	276435	278006	TTRE_0000714301	EB module family protein	UniProtKB/TrEMBL	A0A077ZGP8
59	Trichuris_trichiura_1_006	280001	300000	0.793116	293131	298996	TTRE_0000639001	Solute carrier family 25 2	UniProtKB/TrEMBL	A0A077ZEY2
60	Trichuris_trichiura_1_006	300001	320000	0.781921	300205	301590	TTRE_0000638901	Integrase_H2C2 domain-containing protein	UniProtKB/TrEMBL	A0A077ZCI4
61	Trichuris_trichiura_1_006	300001	320000	0.781921	307378	309097	TTRE_0000638701	Transmembrane protease serine 6	UniProtKB/TrEMBL	A0A077ZCG3
62	Trichuris_trichiura_1_006	300001	320000	0.781921	311800	312920	TTRE_0000638601	Cuticle collagen dpy 7	UniProtKB/TrEMBL	A0A077ZHH1
63	Trichuris_trichiura_1_006	300001	320000	0.781921	319237	320000	TTRE_0000638501	ATP dependent Clp protease ATP binding subunit	UniProtKB/TrEMBL	A0A077ZE19
64	Trichuris_trichiura_1_006	320001	340000	0.751819	320002	323783	TTRE_0000638501	ATP dependent Clp protease ATP binding subunit	UniProtKB/TrEMBL	A0A077ZE19
65	Trichuris_trichiura_1_006	320001	340000	0.751819	330193	331647	TTRE_0000617501	GTP EFTU D2 and GTP EFTU D3 and GTP EFTU domain c ontaining protein	UniProtKB/TrEMBL	A0A077ZEB1
66	Trichuris_trichiura_1_006	320001	340000	0.751819	337028	340000	TTRE_0000617401	Transcription factor IIIB 90 kDa subunit	UniProtKB/TrEMBL	A0A077ZBU4
67	Trichuris_trichiura_1_006	340001	360000	0.773173	340002	340462	TTRE_0000617401	Transcription factor IIIB 90 kDa subunit	UniProtKB/TrEMBL	A0A077ZBU4
68	Trichuris_trichiura_1_006	340001	360000	0.773173	347565	349530	TTRE_0000617301	Tubulin alpha chain	UniProtKB/TrEMBL	A0A077ZBW6
69	Trichuris_trichiura_1_006	340001	360000	0.773173	357606	359094	TTRE_0000617201	SWI:SNF matrix associated	UniProtKB/TrEMBL	A0A077ZGX7
70	Trichuris_trichiura_1_006	360001	380000	0.77997	367362	371124	TTRE_0000617101	CBM 14 and TSP 1 domain containing protein	UniProtKB/TrEMBL	A0A077ZDE6
71	Trichuris_trichiura_1_006	360001	380000	0.77997	371611	372222	TTRE_0000617001
72	Trichuris_trichiura_1_006	400001	420000	0.743905	415153	417190	TTRE_0000363401	Ras domain containing protein	UniProtKB/TrEMBL	A0A077Z4F7
73	Trichuris_trichiura_1_006	400001	420000	0.743905	418127	420000	TTRE_0000363501
74	Trichuris_trichiura_1_006	420001	440000	0.728572	420002	423699	TTRE_0000363501
75	Trichuris_trichiura_1_006	420001	440000	0.728572	439743	440000	TTRE_0000363601	Troponin C	UniProtKB/TrEMBL	A0A077Z6A8
76	Trichuris_trichiura_1_006	440001	460000	0.729269	440002	440650	TTRE_0000363601	Troponin C	UniProtKB/TrEMBL	A0A077Z6A8
77	Trichuris_trichiura_1_006	440001	460000	0.729269	443995	450021	TTRE_0000363701	Pyruvate dehydrogenase phosphatase regulatory sub unit	UniProtKB/TrEMBL	A0A077Z9L5
78	Trichuris_trichiura_1_006	440001	460000	0.729269	456531	457521	TTRE_0000363801	DAO domain containing protein	UniProtKB/TrEMBL	A0A077Z5E8
79	Trichuris_trichiura_1_006	460001	480000	0.677533	473714	475454	TTRE_0000363901
80	Trichuris_trichiura_1_006	460001	480000	0.677533	478081	480000	TTRE_0000364001	Zinc finger protein 423	UniProtKB/TrEMBL	A0A077Z6W4
81	Trichuris_trichiura_1_006	480001	500000	0.692667	480002	490520	TTRE_0000364001	Zinc finger protein 423	UniProtKB/TrEMBL	A0A077Z6W4
82	Trichuris_trichiura_1_006	480001	500000	0.692667	494635	494964	TTRE_0000364101	Zf-C2H2 and zf-C2H2 4 domain containing protein	UniProtKB/TrEMBL	A0A077Z6B4
83	Trichuris_trichiura_1_006	480001	500000	0.692667	498015	498260	TTRE_0000364201
84	Trichuris_trichiura_1_006	520001	540000	0.689463	526848	528324	TTRE_0000475401	MYND finger family protein	UniProtKB/TrEMBL	A0A077Z9L2
85	Trichuris_trichiura_1_006	540001	560000	0.776631	559309	560000	TTRE_0000475501	Homeobox KN domain containing protein	UniProtKB/TrEMBL	A0A077ZCZ0
86	Trichuris_trichiura_1_006	560001	580000	0.761826	560002	561103	TTRE_0000475501	Homeobox KN domain containing protein	UniProtKB/TrEMBL	A0A077ZCZ0
87	Trichuris_trichiura_1_006	580001	600000	0.73111	585651	586725	TTRE_0000475601	Cuticle collagen 6 (Protein roller 8)	UniProtKB/TrEMBL	A0A077Z8C7
88	Trichuris_trichiura_1_006	580001	600000	0.73111	586736	587170	TTRE_0000475701
89	Trichuris_trichiura_1_006	580001	600000	0.73111	587322	589536	TTRE_0000475801	Serine/threonine-protein kinase RIO3	UniProtKB/TrEMBL	A0A077Z9Z0
90	Trichuris_trichiura_1_007	80001	100000	0.705505	93507	100000	TTRE_0000439001	RNA binding protein fusilli	UniProtKB/TrEMBL	A0A077ZBY1
91	Trichuris_trichiura_1_007	100001	120000	0.735879	100002	114537	TTRE_0000439001	RNA binding protein fusilli	UniProtKB/TrEMBL	A0A077ZBY1
92	Trichuris_trichiura_1_007	100001	120000	0.735879	118775	120000	TTRE_0000439101	Protein kinase C	UniProtKB/TrEMBL	A0A077Z7D7
93	Trichuris_trichiura_1_007	360001	380000	0.71324	369287	369914	TTRE_0000981001	Glyco hydro 18 domain containing protein	UniProtKB/TrEMBL	A0A077ZLY3
94	Trichuris_trichiura_2_001	3040001	3060000	0.529022	3040002	3041016	TTRE_0000558501	Vesicular glutamate transporter	UniProtKB/TrEMBL	A0A077ZBU0
95	Trichuris_trichiura_2_001	3040001	3060000	0.529022	3042632	3043236	TTRE_0000558601
96	Trichuris_trichiura_2_001	3040001	3060000	0.529022	3047039	3049788	TTRE_0000558701	Nucleobindin 1	UniProtKB/TrEMBL	A0A077ZAK1
97	Trichuris_trichiura_2_001	7920001	7940000	0.538637	7923257	7923613	TTRE_0000532901	DNA binding protein inhibitor ID 3	UniProtKB/TrEMBL	A0A077Z9Y7
98	Trichuris_trichiura_2_001	7920001	7940000	0.538637	7926573	7927401	TTRE_0000532801	DDRGK domain containing protein	UniProtKB/TrEMBL	A0A077ZED5
99	Trichuris_trichiura_2_001	7920001	7940000	0.538637	7931225	7933611	TTRE_0000532701	WD40 and Prp19 domain containing protein	UniProtKB/TrEMBL	A0A077ZB22
100	Trichuris_trichiura_2_001	7940001	7960000	0.588907	7953610	7953951	TTRE_0000532601	Histone acetyltransferase	UniProtKB/TrEMBL	A0A077ZBZ3
101	Trichuris_trichiura_2_001	7940001	7960000	0.588907	7958576	7960000	TTRE_0000532501	Deoxyribonuclease (DNase) II	UniProtKB/TrEMBL	A0A077Z9A6
102	Trichuris_trichiura_2_001	8900001	8920000	0.690145	8904891	8917670	TTRE_0000553701	Solute carrier family 12	UniProtKB/TrEMBL	A0A077ZAG4
103	Trichuris_trichiura_2_001	8900001	8920000	0.690145	8917834	8919186	TTRE_0000553601	60S ribosomal protein L9	UniProtKB/TrEMBL	A0A077ZF43
104	Trichuris_trichiura_2_001	8900001	8920000	0.690145	8919936	8920000	TTRE_0000553501	Pescadillo homolog	UniProtKB/TrEMBL	A0A077ZBN5
105	Trichuris_trichiura_2_001	9100001	9120000	0.562179	9116403	9117599	TTRE_0000688901	Chymotrypsin-elastase inhibitor ixodidin	UniProtKB/TrEMBL	A0A077ZFF3
106	Trichuris_trichiura_2_001	9340001	9360000	0.523827	9340002	9340594	TTRE_0000826901	Zf-C3Hc3H domain containing protein	UniProtKB/TrEMBL	A0A077ZHQ3
107	Trichuris_trichiura_2_001	9340001	9360000	0.523827	9355557	9359823	TTRE_0000488401	Sodium:nucleoside cotransporter 2	UniProtKB/TrEMBL	A0A077ZA13
108	Trichuris_trichiura_2_001	10000001	10020000	0.524353	10000002	10000188	TTRE_0000830901
109	Trichuris_trichiura_2_001	10000001	10020000	0.524353	10003493	10004592	TTRE_0000454601
110	Trichuris_trichiura_2_001	10000001	10020000	0.524353	10015502	10017914	TTRE_0000454501	Transmembrane protein 33	UniProtKB/TrEMBL	A0A077ZCE1
111	Trichuris_trichiura_2_001	10020001	10040000	0.608605	10023498	10028363	TTRE_0000454401
112	Trichuris_trichiura_2_001	11500001	11520000	0.552414	11514624	11515120	TTRE_0000905601
113	Trichuris_trichiura_2_001	11500001	11520000	0.552414	11515554	11515982	TTRE_0000905501
114	Trichuris_trichiura_2_001	11500001	11520000	0.552414	11518612	11519207	TTRE_0000973301
115	Trichuris_trichiura_2_001	11600001	11620000	0.533627	11601449	11602465	TTRE_0000647501
116	Trichuris_trichiura_2_001	11600001	11620000	0.533627	11602508	11602783	TTRE_0000647401	UPF0086 domain containing protein	UniProtKB/TrEMBL	A0A077ZEC4
117	Trichuris_trichiura_2_001	11600001	11620000	0.533627	11606682	11609456	TTRE_0000647301
118	Trichuris_trichiura_2_001	11720001	11740000	0.499644	11721057	11726941	TTRE_0000778901	Methyltransferase NSUN6	UniProtKB/TrEMBL	A0A077ZLD4
119	Trichuris_trichiura_2_001	11720001	11740000	0.499644	11728371	11730401	TTRE_0000778801	Tubulin alpha chain	UniProtKB/TrEMBL	A0A077ZI14
120	Trichuris_trichiura_2_001	11720001	11740000	0.499644	11735557	11736968	TTRE_0000778701
121	Trichuris_trichiura_2_001	11800001	11820000	0.564669	11816261	11817636	TTRE_0000715501	KRR1 small subunit processome component	UniProtKB/TrEMBL	A0A077ZJR7
122	Trichuris_trichiura_2_001	11900001	11920000	0.515053	11900002	11912479	TTRE_0000684501	UNC93 protein MFSD11	UniProtKB/TrEMBL	A0A077ZDT2
123	Trichuris_trichiura_2_001	11900001	11920000	0.515053	11915300	11918146	TTRE_0000684601	DC STAMP domain containing protein	UniProtKB/TrEMBL	A0A077ZG16
124	Trichuris_trichiura_2_001	11960001	11980000	0.525693	11960002	11960685	TTRE_0000676501	Nucleosome-remodeling factor subunit NURF301-like protein	UniProtKB/TrEMBL	A0A077ZF30
125	Trichuris_trichiura_2_001	11960001	11980000	0.525693	11965278	11969545	TTRE_0000676401	PHD domain-containing protein	UniProtKB/TrEMBL	A0A077ZFV2
126	Trichuris_trichiura_2_001	11960001	11980000	0.525693	11975476	11976733	TTRE_0000676301	DDT domain containing protein	UniProtKB/TrEMBL	A0A077ZDL6
127	Trichuris_trichiura_2_001	11960001	11980000	0.525693	11978936	11979693	TTRE_0000676201	Zf-CCHC domain containing protein	UniProtKB/TrEMBL	A0A077ZDI9
128	Trichuris_trichiura_2_001	12000001	12020000	0.583998	12010185	12010491	TTRE_0000700201	Mediator of rna polymerase ii transcription subun it	UniProtKB/TrEMBL	A0A077ZE84
129	Trichuris_trichiura_2_001	12000001	12020000	0.583998	12019396	12020000	TTRE_0000466601	Serine/threonine-protein phosphatase	UniProtKB/TrEMBL	A0A077Z9P7
130	Trichuris_trichiura_2_001	12020001	12040000	0.552695	12020002	12020277	TTRE_0000466601	Serine/threonine-protein phosphatase	UniProtKB/TrEMBL	A0A077Z9P7
131	Trichuris_trichiura_2_001	12020001	12040000	0.552695	12027821	12029480	TTRE_0000466701	BZIP 2 and Sas10 Utp3 domain containing protein	UniProtKB/TrEMBL	A0A077Z9D5
132	Trichuris_trichiura_2_001	12020001	12040000	0.552695	12032947	12033549	TTRE_0000967901	DUF1758 domain containing protein	UniProtKB/TrEMBL	A0A077ZQY3
133	Trichuris_trichiura_2_001	12020001	12040000	0.552695	12034954	12036436	TTRE_0000870501
134	Trichuris_trichiura_2_001	12020001	12040000	0.552695	12036525	12036822	TTRE_0000601601	DUF5641 domain-containing protein	UniProtKB/TrEMBL	A0A077ZBG4
135	Trichuris_trichiura_2_001	12020001	12040000	0.552695	12038142	12040000	TTRE_0000466801	Pkinase domain containing protein	UniProtKB/TrEMBL	A0A077ZCP9
136	Trichuris_trichiura_2_001	12040001	12060000	0.718382	12040002	12042454	TTRE_0000466801	Pkinase domain containing protein	UniProtKB/TrEMBL	A0A077ZCP9
137	Trichuris_trichiura_2_001	12060001	12080000	0.715551	12060002	12060811	TTRE_0000466901	Patched family protein	UniProtKB/TrEMBL	A0A077Z844
138	Trichuris_trichiura_2_001	12040001	12060000	0.718382	12056391	12060000	TTRE_0000466901	Patched family protein	UniProtKB/TrEMBL	A0A077Z844
139	Trichuris_trichiura_2_001	12060001	12080000	0.715551	12071941	12072438	TTRE_0000467001	Patched domain containing protein	UniProtKB/TrEMBL	A0A077Z7D3
140	Trichuris_trichiura_2_001	12060001	12080000	0.715551	12079509	12079877	TTRE_0000467101	Major sperm protein	UniProtKB/TrEMBL	A0A077Z9P9
141	Trichuris_trichiura_2_001	12120001	12140000	0.638517	12121861	12122237	TTRE_0000949601	Neur chan LBD domain containing protein	UniProtKB/TrEMBL	A0A077ZMU6
142	Trichuris_trichiura_2_001	12120001	12140000	0.638517	12128712	12130779	TTRE_0000897201	GABA receptor subunit	UniProtKB/TrEMBL	A0A077ZLJ2
143	Trichuris_trichiura_2_001	12140001	12160000	0.610966	12140369	12143164	TTRE_0000863001	Neur chan memb domain containing protein	UniProtKB/TrEMBL	A0A077ZIQ1
144	Trichuris_trichiura_2_001	12240001	12260000	0.539647	12259359	12260000	TTRE_0000791101	Tyrosine-protein kinase	UniProtKB/TrEMBL	A0A077ZIF1
145	Trichuris_trichiura_2_001	12260001	12280000	0.581526	12260002	12260819	TTRE_0000791101	Tyrosine-protein kinase	UniProtKB/TrEMBL	A0A077ZIF1
146	Trichuris_trichiura_2_001	12340001	12360000	0.63467	12340656	12342806	TTRE_0000852201	Beta catenin protein 1 like	UniProtKB/TrEMBL	A0A077ZK90
147	Trichuris_trichiura_2_001	12340001	12360000	0.63467	12347796	12348551	TTRE_0000852101
148	Trichuris_trichiura_2_001	12340001	12360000	0.63467	12355341	12357324	TTRE_0000839401	Proteasom PSMB domain containing protein	UniProtKB/TrEMBL	A0A077ZJX0
149	Trichuris_trichiura_2_001	12340001	12360000	0.63467	12357398	12358924	TTRE_0000839301	40S ribosomal protein S3a	UniProtKB/TrEMBL	A0A077ZK25
150	Trichuris_trichiura_2_001	12460001	12480000	0.581435	12460002	12460426	TTRE_0000726201
151	Trichuris_trichiura_2_001	12460001	12480000	0.581435	12464437	12465448	TTRE_0000726301
152	Trichuris_trichiura_2_001	12500001	12520000	0.496498	12502385	12502792	TTRE_0000827001	FARP domain containing protein	UniProtKB/TrEMBL	A0A077ZJR9
153	Trichuris_trichiura_2_001	12500001	12520000	0.496498	12515840	12520000	TTRE_0000760801
154	Trichuris_trichiura_2_001	12560001	12580000	0.677052	12579894	12580000	TTRE_0000665801	26S protease regulatory subunit 8	UniProtKB/TrEMBL	A0A077ZFM1
155	Trichuris_trichiura_2_001	12580001	12600000	0.493576	12580002	12582757	TTRE_0000665801	26S protease regulatory subunit 8	UniProtKB/TrEMBL	A0A077ZFM1
156	Trichuris_trichiura_2_001	12580001	12600000	0.493576	12588205	12588838	TTRE_0000952601	DUF1758 domain containing protein	UniProtKB/TrEMBL	A0A077ZMW4
157	Trichuris_trichiura_2_001	12580001	12600000	0.493576	12589574	12590014	TTRE_0000852401
158	Trichuris_trichiura_2_001	12580001	12600000	0.493576	12591274	12591483	TTRE_0000977201
159	Trichuris_trichiura_2_001	12620001	12640000	0.555788	12620002	12624601	TTRE_0000653301	Calcium-transporting ATPase	UniProtKB/TrEMBL	A0A077ZCT9
160	Trichuris_trichiura_2_001	12640001	12660000	0.647751	12643120	12644076	TTRE_0000653201
161	Trichuris_trichiura_2_001	12640001	12660000	0.647751	12655405	12655898	TTRE_0000653101
162	Trichuris_trichiura_2_001	12660001	12680000	0.569604	12664196	12665822	TTRE_0000699001	Kunitz BPTI and Lustrin cystein domain containing protein	UniProtKB/TrEMBL	A0A077ZE89
163	Trichuris_trichiura_2_001	12660001	12680000	0.569604	12672868	12673711	TTRE_0000699101	Lustrin cystein domain containing protein	UniProtKB/TrEMBL	A0A077ZE76
164	Trichuris_trichiura_2_001	12660001	12680000	0.569604	12673732	12675452	TTRE_0000699201	Lustrin cystein domain containing protein	UniProtKB/TrEMBL	A0A077ZGE7
165	Trichuris_trichiura_2_001	12680001	12700000	0.811921	12685027	12688506	TTRE_0000699301	Integrase_H2C2 domain-containing protein	UniProtKB/TrEMBL	A0A077ZFT8
166	Trichuris_trichiura_2_001	12680001	12700000	0.811921	12699815	12700000	TTRE_0000780901
167	Trichuris_trichiura_2_001	12700001	12720000	0.701574	12700002	12700060	TTRE_0000780901
168	Trichuris_trichiura_2_001	12720001	12740000	0.572703	12720048	12721237	TTRE_0000781001	LBP BPI CETP C domain containing protein	UniProtKB/TrEMBL	A0A077ZLE8
169	Trichuris_trichiura_2_001	12720001	12740000	0.572703	12721638	12722306	TTRE_0000755801	Ribosomal S10 domain containing protein	UniProtKB/TrEMBL	A0A077ZI30
170	Trichuris_trichiura_2_001	12720001	12740000	0.572703	12733554	12734606	TTRE_0000755701
171	Trichuris_trichiura_2_001	13340001	13360000	0.674182	13351050	13351503	TTRE_0000862001	Putative microtubule severing protein katanin p80 subunit b	UniProtKB/TrEMBL	A0A077ZIP3
172	Trichuris_trichiura_2_001	13380001	13400000	0.520119	13391269	13400000	TTRE_0000600201	Zf-C4 and Hormone recep domain containing protein	UniProtKB/TrEMBL	A0A077ZCZ9
173	Trichuris_trichiura_2_001	13380001	13400000	0.520119	13399620	13399955	TTRE_0000600301
174	Trichuris_trichiura_2_001	13420001	13440000	0.569559	13421075	13422532	TTRE_0000600001
175	Trichuris_trichiura_2_001	13460001	13480000	0.502654	13477842	13479081	TTRE_0000845101	Beta-mannosyltransferase bre- beta mannosyltran sferase egh	UniProtKB/TrEMBL	A0A077ZK68
176	Trichuris_trichiura_2_001	13500001	13520000	0.558209	13504523	13504813	TTRE_0000815101	Cytochrome p450 oxidoreductase	UniProtKB/TrEMBL	A0A077ZHK8
177	Trichuris_trichiura_2_001	13540001	13560000	0.511793	13546805	13547000	TTRE_0000922901
178	Trichuris_trichiura_2_001	13620001	13640000	0.678979	13632999	13633325	TTRE_0000873201
179	Trichuris_trichiura_2_001	13640001	13660000	0.676241	13658478	13659027	TTRE_0000850701	NIDO domain containing protein	UniProtKB/TrEMBL	A0A077ZIF4
180	Trichuris_trichiura_2_001	14260001	14280000	0.594071	14261571	14261884	TTRE_0000975601
181	Trichuris_trichiura_2_001	14260001	14280000	0.594071	14262540	14262851	TTRE_0000939001
182	Trichuris_trichiura_2_001	14260001	14280000	0.594071	14263447	14263963	TTRE_0000967101
183	Trichuris_trichiura_2_001	14260001	14280000	0.594071	14269891	14270511	TTRE_0000941601
184	Trichuris_trichiura_2_001	14260001	14280000	0.594071	14277220	14277804	TTRE_0000944201
185	Trichuris_trichiura_2_001	14260001	14280000	0.594071	14277572	14277827	TTRE_0000966601
186	Trichuris_trichiura_2_001	14260001	14280000	0.594071	14278104	14278296	TTRE_0000941401
187	Trichuris_trichiura_2_001	14260001	14280000	0.594071	14278404	14278769	TTRE_0000941501
188	Trichuris_trichiura_2_001	14260001	14280000	0.594071	14279736	14280000	TTRE_0000940801
189	Trichuris_trichiura_2_001	14300001	14320000	0.531445	14302545	14304289	TTRE_0000939101
190	Trichuris_trichiura_2_001	14300001	14320000	0.531445	14304376	14304996	TTRE_0000973901
191	Trichuris_trichiura_2_001	14300001	14320000	0.531445	14311616	14311927	TTRE_0000946401
192	Trichuris_trichiura_2_001	14300001	14320000	0.531445	14312319	14313529	TTRE_0000966501
193	Trichuris_trichiura_2_001	14300001	14320000	0.531445	14314133	14314460	TTRE_0000980501
194	Trichuris_trichiura_2_001	14300001	14320000	0.531445	14314530	14314945	TTRE_0000921801	R2 protein	UniProtKB/TrEMBL	A0A077ZM55
195	Trichuris_trichiura_2_001	15500001	15520000	0.512466	15517676	15520000	TTRE_0000534601	Ion trans 2 domain containing protein	UniProtKB/TrEMBL	A0A077Z9Z7
196	Trichuris_trichiura_2_001	15640001	15660000	0.53681	15646037	15647100	TTRE_0000652001
197	Trichuris_trichiura_2_001	15640001	15660000	0.53681	15647167	15647367	TTRE_0000651901	ATP-binding cassette transporter	UniProtKB/TrEMBL	A0A077ZCX6
198	Trichuris_trichiura_2_001	15640001	15660000	0.53681	15648135	15649844	TTRE_0000651701	Tas retrotransposon peptidase A16 superfamily	UniProtKB/TrEMBL	A0A077ZCT2
199	Trichuris_trichiura_2_001	15640001	15660000	0.53681	15657349	15658209	TTRE_0000651501	Histone H3	UniProtKB/TrEMBL	A0A077ZHY4
200	Trichuris_trichiura_2_001	15720001	15740000	0.523249	15721543	15722512	TTRE_0000869601	Histone H3	UniProtKB/TrEMBL	A0A077ZKU3
201	Trichuris_trichiura_2_001	15720001	15740000	0.523249	15733416	15734937	TTRE_0000424501	Histone domain containing protein	UniProtKB/TrEMBL	A0A077Z6Z3
202	Trichuris_trichiura_2_001	18400001	18420000	0.564636	18400002	18402745	TTRE_0000411401	Patched domain containing protein	UniProtKB/TrEMBL	A0A077ZB01
203	Trichuris_trichiura_2_001	18400001	18420000	0.564636	18411120	18412782	TTRE_0000411501	Protein srx protein npr protein cbr srx-1 prot ein cbr npr-19 cre srx-64 protein cre npr-19 protein	UniProtKB/TrEMBL	A0A077Z6M5
204	Trichuris_trichiura_2_001	18420001	18440000	0.543747	18436815	18439475	TTRE_0000592901	DUF2435 domain containing protein	UniProtKB/TrEMBL	A0A077ZBC6
205	Trichuris_trichiura_2_001	18620001	18640000	0.611847	18631289	18631594	TTRE_0000423201
206	Trichuris_trichiura_2_001	19080001	19100000	0.521463	19094172	19095241	TTRE_0000644801	Tfb4 domain containing protein	UniProtKB/TrEMBL	A0A077ZEA5
207	Trichuris_trichiura_2_001	20340001	20360000	0.499617	20351944	20355736	TTRE_0000151801	Patched family protein	UniProtKB/TrEMBL	A0A077YZS9
208	Trichuris_trichiura_2_001	20340001	20360000	0.499617	20359962	20360000	TTRE_0000151901	Pkinase domain containing protein	UniProtKB/TrEMBL	A0A077Z3G2
209	Trichuris_trichiura_2_001	24700001	24720000	0.589224	24701260	24703743	TTRE_0000269701
210	Trichuris_trichiura_2_001	28520001	28540000	0.60476	28520002	28521786	TTRE_0000316101	CDC45 domain containing protein	UniProtKB/TrEMBL	A0A077Z495
211	Trichuris_trichiura_2_001	28520001	28540000	0.60476	28523805	28525686	TTRE_0000316001	Inward rectifier potassium channel irk-1	UniProtKB/TrEMBL	A0A077Z862
212	Trichuris_trichiura_2_001	28520001	28540000	0.60476	28536408	28537124	TTRE_0000315901
213	Trichuris_trichiura_2_001	28520001	28540000	0.60476	28538047	28540000	TTRE_0000315801	Dicer dimer and Helicase C and PAZ and Ribonuclea se 3 domain containing protein	UniProtKB/TrEMBL	A0A077Z5F4
214	Trichuris_trichiura_2_001	28560001	28580000	0.572428	28560002	28567520	TTRE_0000315601	Proton myo inositol cotransporter	UniProtKB/TrEMBL	A0A077Z491
215	Trichuris_trichiura_2_001	28580001	28600000	0.534379	28580002	28584460	TTRE_0000315501	SMC N domain containing protein	UniProtKB/TrEMBL	A0A077Z858
216	Trichuris_trichiura_2_001	28560001	28580000	0.572428	28576403	28580000	TTRE_0000315501	SMC N domain containing protein	UniProtKB/TrEMBL	A0A077Z858
217	Trichuris_trichiura_2_001	28580001	28600000	0.534379	28585694	28586965	TTRE_0000315401	Ornithine aminotransferase	UniProtKB/TrEMBL	A0A077Z4V5
218	Trichuris_trichiura_2_001	28580001	28600000	0.534379	28594589	28596822	TTRE_0000315301	Vesicular glutamate transporter 1	UniProtKB/TrEMBL	A0A077Z5E7
219	Trichuris_trichiura_2_001	28580001	28600000	0.534379	28597864	28599344	TTRE_0000315201	Tetraspanin	UniProtKB/TrEMBL	A0A077Z304
220	Trichuris_trichiura_2_001	28840001	28860000	0.593926	28840002	28845309	TTRE_0000754501	Matrix metalloproteinase 17	UniProtKB/TrEMBL	A0A077ZKV2
221	Trichuris_trichiura_2_001	28840001	28860000	0.593926	28855441	28860000	TTRE_0000865301	Serpin domain containing protein	UniProtKB/TrEMBL	A0A077ZKR2
222	Trichuris_trichiura_2_001	28860001	28880000	0.623603	28860002	28862677	TTRE_0000865301	Serpin domain containing protein	UniProtKB/TrEMBL	A0A077ZKR2
223	Trichuris_trichiura_2_001	28860001	28880000	0.623603	28864983	28865394	TTRE_0000960401	Serpin domain containing protein	UniProtKB/TrEMBL	A0A077ZN18
224	Trichuris_trichiura_2_001	28960001	28980000	0.495321	28960002	28960670	TTRE_0000279401	DEAD and Helicase C domain containing protein	UniProtKB/TrEMBL	A0A077Z3T7
225	Trichuris_trichiura_2_001	28960001	28980000	0.495321	28962445	28964184	TTRE_0000279501	26s proteasome non atpase regulatory subunit	UniProtKB/TrEMBL	A0A077Z779
226	Trichuris_trichiura_2_001	28960001	28980000	0.495321	28967241	28969699	TTRE_0000279601	Negative elongation factor D	UniProtKB/TrEMBL	A0A077Z3B0
227	Trichuris_trichiura_2_001	28960001	28980000	0.495321	28970977	28973795	TTRE_0000279701	Proteasome activator pa28 beta subunit family pro tein	UniProtKB/TrEMBL	A0A077Z201
228	Trichuris_trichiura_2_001	28960001	28980000	0.495321	28978122	28980000	TTRE_0000279801	EGF CA and EGF 3 domain containing protein	UniProtKB/TrEMBL	A0A077Z4D5
229	Trichuris_trichiura_2_001	29040001	29060000	0.507811	29040002	29047056	TTRE_0000280501
230	Trichuris_trichiura_2_001	29040001	29060000	0.507811	29049556	29054497	TTRE_0000280601	Carboxylesterase	UniProtKB/TrEMBL	A0A077Z3B9
231	Trichuris_trichiura_2_001	29040001	29060000	0.507811	29054702	29057377	TTRE_0000280701
232	Trichuris_trichiura_2_001	29080001	29100000	0.495051	29080002	29082782	TTRE_0000422101
233	Trichuris_trichiura_2_001	29080001	29100000	0.495051	29086885	29100000	TTRE_0000422201	ATP binding cassette sub family A	UniProtKB/TrEMBL	A0A077Z8I5
234	Trichuris_trichiura_2_001	29120001	29140000	0.535478	29120002	29128608	TTRE_0000422301	Patched domain containing protein	UniProtKB/TrEMBL	A0A077Z855
235	Trichuris_trichiura_2_001	29120001	29140000	0.535478	29129510	29140000	TTRE_0000422401	SAM 2 domain containing protein	UniProtKB/TrEMBL	A0A077ZBC0
236	Trichuris_trichiura_3_001	7300001	7320000	0.540564	7300002	7300909	TTRE_0000193501	Major facilitator superfamily transporter	UniProtKB/TrEMBL	A0A077Z4Q9
237	Trichuris_trichiura_3_001	9020001	9040000	0.571965	9023947	9025024	TTRE_0000074901	Paired box protein	UniProtKB/TrEMBL	A0A077YWQ8
238	Trichuris_trichiura_3_001	9020001	9040000	0.571965	9024932	9027875	TTRE_0000074801	Sorting nexin 6	UniProtKB/TrEMBL	A0A077YXI6
239	Trichuris_trichiura_3_001	9020001	9040000	0.571965	9030177	9033259	TTRE_0000074701	Serine palmitoyltransferase 2	UniProtKB/TrEMBL	A0A077Z1P5
240	Trichuris_trichiura_3_001	9040001	9060000	0.505504	9044248	9044586	TTRE_0000074601	Vacuolar protein sorting	UniProtKB/TrEMBL	A0A077YXI0
241	Trichuris_trichiura_3_001	9040001	9060000	0.505504	9045566	9047197	TTRE_0000074501	Non-specific serine/threonine protein kinase	UniProtKB/TrEMBL	A0A077YYF3
242	Trichuris_trichiura_3_001	9040001	9060000	0.505504	9055396	9060000	TTRE_0000074401	WAP domain containing protein, SLPI-like	UniProtKB/TrEMBL	A0A077YWQ4
243	Trichuris_trichiura_3_001	9140001	9160000	0.540808	9140002	9144217	TTRE_0000073501	Mitogen activated protein kinase kinase kinase	UniProtKB/TrEMBL	A0A077YYE1
244	Trichuris_trichiura_3_001	9140001	9160000	0.540808	9150200	9150537	TTRE_0000901901
245	Trichuris_trichiura_3_001	9140001	9160000	0.540808	9150477	9150530	TTRE_0000945401	CTD nuclear envelope phosphatase 1	UniProtKB/TrEMBL	A0A077ZMR3
246	Trichuris_trichiura_3_001	9140001	9160000	0.540808	9157363	9158048	TTRE_0000073401
247	Trichuris_trichiura_3_002	1	20000	0.553599	19991	20000	TTRE_0000965701
248	Trichuris_trichiura_3_002	1460001	1480000	0.494493	1467333	1467953	TTRE_0000729101	Bcl 2:adenovirus E1B 19K interacting protein 3	UniProtKB/TrEMBL	A0A077ZEY8
249	Trichuris_trichiura_3_002	1460001	1480000	0.494493	1468673	1473095	TTRE_0000729001	CCAAT:enhancer binding protein zeta	UniProtKB/TrEMBL	A0A077ZF17
250	Trichuris_trichiura_3_002	1460001	1480000	0.494493	1473717	1475414	TTRE_0000728901	Trehalase	UniProtKB/TrEMBL	A0A077ZK08
251	Trichuris_trichiura_3_002	1460001	1480000	0.494493	1476251	1476726	TTRE_0000728801	DNA directed RNA polymerase II subunit RPB9	UniProtKB/TrEMBL	A0A077ZGL6
252	Trichuris_trichiura_3_002	1460001	1480000	0.494493	1477195	1480000	TTRE_0000728701	Lysine specific demethylase 6a	UniProtKB/TrEMBL	A0A077ZH12
253	Trichuris_trichiura_3_002	1940001	1960000	0.66368	1944255	1945453	TTRE_0000356401	Protein unc-1	UniProtKB/TrEMBL	A0A077Z488
254	Trichuris_trichiura_3_002	1960001	1980000	0.643066	1969578	1979136	TTRE_0000356501	Glypican domain containing protein	UniProtKB/TrEMBL	A0A077Z6P9
255	Trichuris_trichiura_3_002	1960001	1980000	0.643066	1978307	1979129	TTRE_0000356601
256	Trichuris_trichiura_3_002	2020001	2040000	0.569835	2020002	2020678	TTRE_0000620401	Cullin 4B	UniProtKB/TrEMBL	A0A077ZDI3
257	Trichuris_trichiura_3_002	2020001	2040000	0.569835	2023015	2023674	TTRE_0000620501	Sumo conjugating enzyme ubc sumo-conjugating en zyme ubc	UniProtKB/TrEMBL	A0A077ZGZ7
258	Trichuris_trichiura_3_002	2020001	2040000	0.569835	2025111	2035714	TTRE_0000620601	Multidrug resistance associated protein 4	UniProtKB/TrEMBL	A0A077ZBZ1
259	Trichuris_trichiura_3_002	2760001	2780000	0.527231	2760002	2776131	TTRE_0000123301	Ankyrin repeat protein	UniProtKB/TrEMBL	A0A077YYR3
260	Trichuris_trichiura_3_002	2760001	2780000	0.527231	2778834	2779906	TTRE_0000123201	ShK and DUF1794 domain containing protein	UniProtKB/TrEMBL	A0A077Z2P3
261	Trichuris_trichiura_3_002	2780001	2800000	0.57197	2784368	2787011	TTRE_0000123101	GLTSCR1 domain containing protein	UniProtKB/TrEMBL	A0A077YYX3
262	Trichuris_trichiura_3_002	2780001	2800000	0.57197	2797919	2798897	TTRE_0000123001	Carbonic anhydrase	UniProtKB/TrEMBL	A0A077YZT0
263	Trichuris_trichiura_3_002	2820001	2840000	0.550878	2822485	2823036	TTRE_0000122701	Two pore potassium channel protein sup-9	UniProtKB/TrEMBL	A0A077Z2N8
264	Trichuris_trichiura_3_002	2820001	2840000	0.550878	2825981	2827925	TTRE_0000122601	DUF3456 and EGF CA domain containing protein	UniProtKB/TrEMBL	A0A077YYW8
265	Trichuris_trichiura_3_002	2820001	2840000	0.550878	2830462	2832370	TTRE_0000122501	Proteasome subunit beta type 2	UniProtKB/TrEMBL	A0A077YZS4
266	Trichuris_trichiura_3_002	2820001	2840000	0.550878	2833757	2836739	TTRE_0000122401
267	Trichuris_trichiura_3_002	2840001	2860000	0.5684	2842394	2844091	TTRE_0000122301	YIF1 domain containing protein	UniProtKB/TrEMBL	A0A077YYQ4
268	Trichuris_trichiura_3_002	2840001	2860000	0.5684	2850420	2851541	TTRE_0000122201	HEGF domain containing protein	UniProtKB/TrEMBL	A0A077Z2N4
269	Trichuris_trichiura_3_002	2860001	2880000	0.539353	2873152	2874237	TTRE_0000122101
270	Trichuris_trichiura_3_002	2880001	2900000	0.609219	2887821	2888836	TTRE_0000122001	Lipocalin domain containing protein	UniProtKB/TrEMBL	A0A077YZR9
271	Trichuris_trichiura_3_002	2900001	2920000	0.649706	2900067	2910249	TTRE_0000121901	Solute carrier family 12	UniProtKB/TrEMBL	A0A077YXW4
272	Trichuris_trichiura_3_002	2900001	2920000	0.649706	2910453	2913788	TTRE_0000121801	PAS 11 domain containing protein	UniProtKB/TrEMBL	A0A077YYQ0
273	Trichuris_trichiura_3_002	2920001	2940000	0.512916	2926227	2927420	TTRE_0000121701	Cuticle collagen lon 3	UniProtKB/TrEMBL	A0A077Z2M8
274	Trichuris_trichiura_3_002	2920001	2940000	0.512916	2938607	2939017	TTRE_0000810101	Histone H3	UniProtKB/TrEMBL	A0A077ZKR5
275	Trichuris_trichiura_3_002	2960001	2980000	0.571841	2965908	2970753	TTRE_0000225801	Pkinase domain containing protein	UniProtKB/TrEMBL	A0A077Z261
276	Trichuris_trichiura_3_002	2960001	2980000	0.571841	2972998	2973240	TTRE_0000225701
277	Trichuris_trichiura_3_002	2960001	2980000	0.571841	2977571	2980000	TTRE_0000141401	Retrovirus-related Pol polyprotein from transposo n TNT 1-94	UniProtKB/TrEMBL	A0A077YZE4
278	Trichuris_trichiura_3_002	3020001	3040000	0.563967	3020699	3021244	TTRE_0000225401	Protein Mpv17	UniProtKB/TrEMBL	A0A077Z5M5
279	Trichuris_trichiura_3_002	3020001	3040000	0.563967	3021578	3028800	TTRE_0000225301	Component of oligomeric golgi complex 2	UniProtKB/TrEMBL	A0A077Z256
280	Trichuris_trichiura_3_002	3020001	3040000	0.563967	3031689	3032381	TTRE_0000225201
281	Trichuris_trichiura_3_002	3020001	3040000	0.563967	3033533	3034005	TTRE_0000225101	HLH domain containing protein	UniProtKB/TrEMBL	A0A077Z0L4
282	Trichuris_trichiura_3_002	3040001	3060000	0.517186	3050181	3052914	TTRE_0000225001	Sodium:potassium transporting ATPase subunit	UniProtKB/TrEMBL	A0A077Z1L9
283	Trichuris_trichiura_3_002	3040001	3060000	0.517186	3053270	3054614	TTRE_0000224901	ATP dependent RNA helicase DDX19A	UniProtKB/TrEMBL	A0A077Z5L9
284	Trichuris_trichiura_3_002	3040001	3060000	0.517186	3058823	3059495	TTRE_0000224801	60S ribosomal protein L28	UniProtKB/TrEMBL	A0A077Z252
285	Trichuris_trichiura_3_002	3100001	3120000	0.527611	3107581	3108364	TTRE_0000224701
286	Trichuris_trichiura_3_002	3100001	3120000	0.527611	3117371	3119023	TTRE_0000224601	LBP	UniProtKB/TrEMBL	A0A077Z0L0
287	Trichuris_trichiura_3_002	3400001	3420000	0.511979	3406001	3416980	TTRE_0000257401
288	Trichuris_trichiura_3_002	3400001	3420000	0.511979	3417373	3420000	TTRE_0000257301	Protein vertebrate piccolo	UniProtKB/TrEMBL	A0A077Z3Q3
289	Trichuris_trichiura_3_002	3440001	3460000	0.545896	3443940	3445820	TTRE_0000749201	Zf-C2H2 jaz and zf-met domain containing protein	UniProtKB/TrEMBL	A0A077ZFL7
290	Trichuris_trichiura_3_002	3440001	3460000	0.545896	3453712	3456626	TTRE_0000749101	Suppression of tumorigenicity	UniProtKB/TrEMBL	A0A077ZFP9
291	Trichuris_trichiura_3_002	3460001	3480000	0.607368	3460688	3462726	TTRE_0000749001	C1 1 and Pkinase and Pkinase C domain containing protein	UniProtKB/TrEMBL	A0A077ZKQ4
292	Trichuris_trichiura_3_002	3460001	3480000	0.607368	3468537	3469362	TTRE_0000809701	C1 1 domain containing protein	UniProtKB/TrEMBL	A0A077ZHC5
293	Trichuris_trichiura_3_002	3480001	3500000	0.512652	3482833	3485679	TTRE_0000905301	GSHPx domain containing protein	UniProtKB/TrEMBL	A0A077ZJY1
294	Trichuris_trichiura_3_002	3480001	3500000	0.512652	3486956	3487348	TTRE_0000985001
295	Trichuris_trichiura_3_002	3480001	3500000	0.512652	3493757	3498989	TTRE_0000856301	RRM 1 domain containing protein	UniProtKB/TrEMBL	A0A077ZKB2
296	Trichuris_trichiura_3_002	3520001	3540000	0.521226	3520002	3524752	TTRE_0000698501	Bromodomain domain containing protein	UniProtKB/TrEMBL	A0A077ZE85
297	Trichuris_trichiura_3_002	3520001	3540000	0.521226	3530889	3533071	TTRE_0000698601	GTP binding protein 2	UniProtKB/TrEMBL	A0A077ZE73
298	Trichuris_trichiura_3_002	3520001	3540000	0.521226	3534253	3535314	TTRE_0000698701	Putative tRNA (cytidine(32)/guanosine(34)-2'-O)-methyltransferase	UniProtKB/TrEMBL	A0A077ZGE2
299	Trichuris_trichiura_3_002	3580001	3600000	0.537295	3580409	3587854	TTRE_0000277801	Solute carrier family 12	UniProtKB/TrEMBL	A0A077Z4B0
300	Trichuris_trichiura_3_002	3580001	3600000	0.537295	3595140	3600000	TTRE_0000277901	Putative paired box protein Pax-2	UniProtKB/TrEMBL	A0A077Z3S4
301	Trichuris_trichiura_3_002	3720001	3740000	0.528734	3725078	3730850	TTRE_0000610801	RabGAP-TBC and TLD domain containing protein	UniProtKB/TrEMBL	A0A077ZBP7
302	Trichuris_trichiura_3_002	3720001	3740000	0.528734	3732777	3733359	TTRE_0000610901	AP complex subunit sigma	UniProtKB/TrEMBL	A0A077ZE53
303	Trichuris_trichiura_3_002	3720001	3740000	0.528734	3737071	3740000	TTRE_0000728001
304	Trichuris_trichiura_3_002	3780001	3800000	0.495145	3780877	3782340	TTRE_0000593301	Tyrosine--tRNA ligase	UniProtKB/TrEMBL	A0A077ZGA9
305	Trichuris_trichiura_3_002	3780001	3800000	0.495145	3786720	3787617	TTRE_0000593201	RNA exonuclease 4	UniProtKB/TrEMBL	A0A077ZCV1
306	Trichuris_trichiura_3_002	3780001	3800000	0.495145	3790378	3791106	TTRE_0000593101	Putative universal minicircle sequence binding pr otein (UMSBP)	UniProtKB/TrEMBL	A0A077ZDS0
307	Trichuris_trichiura_3_002	3780001	3800000	0.495145	3796800	3798637	TTRE_0000593001	PWWP domain containing protein	UniProtKB/TrEMBL	A0A077ZBB7
308	Trichuris_trichiura_3_002	4260001	4280000	0.503014	4272365	4272535	TTRE_0000698801
309	Trichuris_trichiura_3_002	4260001	4280000	0.503014	4276924	4280000	TTRE_0000708901	Polypeptide N-acetylgalactosaminyltransferase	UniProtKB/TrEMBL	A0A077ZG42
310	Trichuris_trichiura_3_002	4280001	4300000	0.504962	4280002	4286172	TTRE_0000708901	Polypeptide N-acetylgalactosaminyltransferase	UniProtKB/TrEMBL	A0A077ZG42
311	Trichuris_trichiura_3_002	4280001	4300000	0.504962	4291763	4295870	TTRE_0000708801
312	Trichuris_trichiura_3_002	4300001	4320000	0.494123	4301327	4307856	TTRE_0000708701
313	Trichuris_trichiura_3_002	4400001	4420000	0.496955	4400034	4401683	TTRE_0000928601
314	Trichuris_trichiura_3_002	4400001	4420000	0.496955	4401828	4404421	TTRE_0000518801
315	Trichuris_trichiura_3_002	4400001	4420000	0.496955	4414327	4414536	TTRE_0000518701
316	Trichuris_trichiura_3_002	4660001	4680000	0.519976	4671124	4680000	TTRE_0000626301	Protein kcc	UniProtKB/TrEMBL	A0A077ZC29
317	Trichuris_trichiura_3_002	4720001	4740000	0.526111	4720002	4722711	TTRE_0000863801
318	Trichuris_trichiura_3_002	4720001	4740000	0.526111	4723432	4726941	TTRE_0000863901
319	Trichuris_trichiura_3_002	4720001	4740000	0.526111	4732751	4734883	TTRE_0000799201	LIM domain containing protein	UniProtKB/TrEMBL	A0A077ZIU8
320	Trichuris_trichiura_3_002	4760001	4780000	0.499906	4765212	4768517	TTRE_0000830401	DUF3677 domain containing protein	UniProtKB/TrEMBL	A0A077ZHT1
321	Trichuris_trichiura_3_002	4760001	4780000	0.499906	4773362	4774794	TTRE_0000830301	Herpes UL52 domain containing protein	UniProtKB/TrEMBL	A0A077ZHW2
322	Trichuris_trichiura_3_002	4900001	4920000	0.495102	4900252	4904700	TTRE_0000519301	Cleavage stimulation factor subunit 3	UniProtKB/TrEMBL	A0A077ZE18
323	Trichuris_trichiura_3_002	4940001	4960000	0.495166	4942564	4943290	TTRE_0000724901
324	Trichuris_trichiura_3_002	4940001	4960000	0.495166	4945884	4946315	TTRE_0000978601
325	Trichuris_trichiura_3_002	4940001	4960000	0.495166	4947003	4947581	TTRE_0000978701
326	Trichuris_trichiura_3_002	4940001	4960000	0.495166	4958823	4960000	TTRE_0000623401	Ras specific guanine nucleotide releasing factor	UniProtKB/TrEMBL	A0A077ZDM1
327	Trichuris_trichiura_3_002	4960001	4980000	0.528935	4960002	4963705	TTRE_0000623401	Ras specific guanine nucleotide releasing factor	UniProtKB/TrEMBL	A0A077ZDM1
328	Trichuris_trichiura_3_002	4960001	4980000	0.528935	4964034	4965224	TTRE_0000623301
329	Trichuris_trichiura_3_002	4960001	4980000	0.528935	4966572	4968507	TTRE_0000623201	Helicase SKI2W	UniProtKB/TrEMBL	A0A077ZC05
330	Trichuris_trichiura_3_002	4960001	4980000	0.528935	4967244	4968752	TTRE_0000623101
331	Trichuris_trichiura_3_002	4960001	4980000	0.528935	4973952	4980000	TTRE_0000622901	Helicase C and DEAD and DSHCT domain containing p rotein	UniProtKB/TrEMBL	A0A077ZDL4
332	Trichuris_trichiura_3_002	4980001	5000000	0.537755	4980002	4984746	TTRE_0000622901	Helicase C and DEAD and DSHCT domain containing p rotein	UniProtKB/TrEMBL	A0A077ZDL4
333	Trichuris_trichiura_3_002	4960001	4980000	0.528935	4979976	4980000	TTRE_0000623001
334	Trichuris_trichiura_3_002	4980001	5000000	0.537755	4980002	4980287	TTRE_0000623001
335	Trichuris_trichiura_3_002	4980001	5000000	0.537755	4988554	4989881	TTRE_0000622801	ADK domain containing protein	UniProtKB/TrEMBL	A0A077ZEG3
336	Trichuris_trichiura_3_002	4980001	5000000	0.537755	4990216	4991446	TTRE_0000622701	Adenylate kinase isoenzyme 1	UniProtKB/TrEMBL	A0A077ZC00
337	Trichuris_trichiura_3_002	4980001	5000000	0.537755	4991901	4993441	TTRE_0000622601	Endophilin protein 1, b	UniProtKB/TrEMBL	A0A077ZC07
338	Trichuris_trichiura_3_002	4980001	5000000	0.537755	4993589	4994545	TTRE_0000622501	Hep 59 domain containing protein	UniProtKB/TrEMBL	A0A077ZH18
339	Trichuris_trichiura_3_002	4980001	5000000	0.537755	4995022	4995719	TTRE_0000622401	40S ribosomal protein S18	UniProtKB/TrEMBL	A0A077ZDK7
340	Trichuris_trichiura_3_002	5120001	5140000	0.527532	5120838	5121509	TTRE_0000983701	Zinc knuckle protein	UniProtKB/TrEMBL	A0A077ZNH4
341	Trichuris_trichiura_3_002	5120001	5140000	0.527532	5130422	5133357	TTRE_0000515101	Protein rme isoform c protein rme isoform b pro tein rme isoform a	UniProtKB/TrEMBL	A0A077ZBA9
342	Trichuris_trichiura_3_002	5120001	5140000	0.527532	5133901	5135776	TTRE_0000515001	EF-hand 4 domain containing protein	UniProtKB/TrEMBL	A0A077Z8S2
343	Trichuris_trichiura_3_002	5120001	5140000	0.527532	5137129	5137777	TTRE_0000514901	L51 S25 CI-B8 domain containing protein	UniProtKB/TrEMBL	A0A077Z9G5
344	Trichuris_trichiura_3_002	5120001	5140000	0.527532	5139170	5140000	TTRE_0000514801	Calcineurin subunit B type 1	UniProtKB/TrEMBL	A0A077ZDX2
345	Trichuris_trichiura_3_003	960001	980000	0.526563	960680	961500	TTRE_0000294301	SH3 2 domain containing protein	UniProtKB/TrEMBL	A0A077Z4X1
346	Trichuris_trichiura_3_003	960001	980000	0.526563	963941	964783	TTRE_0000294201	Macro domain containing protein	UniProtKB/TrEMBL	A0A077Z2L9
347	Trichuris_trichiura_3_003	960001	980000	0.526563	964911	966834	TTRE_0000294101	IFRD C and IFRD domain containing protein	UniProtKB/TrEMBL	A0A077Z3T3
348	Trichuris_trichiura_3_003	960001	980000	0.526563	972304	973272	TTRE_0000294001
349	Trichuris_trichiura_3_003	960001	980000	0.526563	977948	980000	TTRE_0000293901	Laminin protein lam 2	UniProtKB/TrEMBL	A0A077Z4D6
350	Trichuris_trichiura_3_003	1580001	1600000	0.706037	1595299	1595498	TTRE_0000707701	DUF5641 domain-containing protein	UniProtKB/TrEMBL	A0A077ZEF3
351	Trichuris_trichiura_3_003	1840001	1860000	0.587028	1840064	1842368	TTRE_0000896401	DUF229 domain containing protein	UniProtKB/TrEMBL	A0A077ZJJ8
352	Trichuris_trichiura_3_003	1840001	1860000	0.587028	1855358	1856765	TTRE_0000484901
353	Trichuris_trichiura_3_003	1920001	1940000	0.504201	1920002	1925682	TTRE_0000098801	Capicua protein	UniProtKB/TrEMBL	A0A077YY68
354	Trichuris_trichiura_3_003	1920001	1940000	0.504201	1931727	1932017	TTRE_0000098901
355	Trichuris_trichiura_3_003	1920001	1940000	0.504201	1938466	1939787	TTRE_0000099001	Soluble calcium activated nucleotidase 1	UniProtKB/TrEMBL	A0A077YZ49
356	Trichuris_trichiura_3_005	260001	280000	0.530529	272871	275872	TTRE_0000163001
357	Trichuris_trichiura_3_005	260001	280000	0.530529	277917	279028	TTRE_0000163101
358	Trichuris_trichiura_3_005	280001	300000	0.675129	287329	294654	TTRE_0000163201	Voltage-dependent L-type calcium channel subunit alpha	UniProtKB/TrEMBL	A0A077Z0W2
