# Supplementary material for: Population genomics of ancient and modern Trichuris trichiura
Source: Nat Commun. 2022 Jul 6;13:3888. doi: 10.1038/s41467-022-31487-x (PMC9259628; doi:10.1038/s41467-022-31487-x)
Supplement: Supplementary file 8 — Supplementary Data 5 [file 41467_2022_31487_MOESM8_ESM.xlsx]

## Sheet: Sheet1
COUNT	CHROMSOME	BIN_START	BIN_END	WEIGHTED_FST	GENE_START	GENE_END	GENE_ID	INTERPROSCAN_DESCRIPTION	INTERPROSCAN_SOURCE	INTERPROSCAN_SOURCE_ACCESSION
1	Trichuris_trichiura_00_001	460001	480000	0.546106	471264	474663	TTRE_0000558801
2	Trichuris_trichiura_00_001	580001	600000	0.734062	586516	589714	TTRE_0000644201	DUF1758 and DUF1759 and RVT 1 and Peptidase A17 d omain containing protein	UniProtKB/TrEMBL	A0A077ZEA3
3	Trichuris_trichiura_00_005	200001	220000	0.527035	200002	200142	TTRE_0000689801
4	Trichuris_trichiura_00_022	80001	100000	0.569441	81888	82956	TTRE_0000697701	Kinase	UniProtKB/TrEMBL	A0A077ZGE0
5	Trichuris_trichiura_00_025	80001	100000	0.638525	80002	80953	TTRE_0000474301	MBOAT domain containing protein	UniProtKB/TrEMBL	A0A077Z9X1
6	Trichuris_trichiura_00_034	20001	40000	0.526924	21594	22631	TTRE_0000163501	Reverse transcriptase	UniProtKB/TrEMBL	A0A077Z000
7	Trichuris_trichiura_00_034	20001	40000	0.526924	25034	26044	TTRE_0000163601
8	Trichuris_trichiura_00_034	20001	40000	0.526924	33780	34211	TTRE_0000872801
9	Trichuris_trichiura_00_044	20001	40000	0.75789	20890	23115	TTRE_0000190301
10	Trichuris_trichiura_00_044	20001	40000	0.75789	38536	40000	TTRE_0000842401
11	Trichuris_trichiura_00_044	40001	60000	0.559972	40002	40513	TTRE_0000842401
12	Trichuris_trichiura_00_044	40001	60000	0.559972	46089	46846	TTRE_0000707801	EGF 2 domain containing protein	UniProtKB/TrEMBL	A0A077ZGI8
13	Trichuris_trichiura_00_044	40001	60000	0.559972	47403	47750	TTRE_0000707601
14	Trichuris_trichiura_00_044	40001	60000	0.559972	50433	59035	TTRE_0000707501	Transmembrane cell adhesion receptor mua 3	UniProtKB/TrEMBL	A0A077ZJK3
15	Trichuris_trichiura_00_047	20001	40000	0.596612	22620	23634	TTRE_0000797901
16	Trichuris_trichiura_00_047	40001	60000	0.618151	43102	44127	TTRE_0000983201	Polyprotein	UniProtKB/TrEMBL	A0A077ZNH0
17	Trichuris_trichiura_00_047	40001	60000	0.618151	49955	50974	TTRE_0000896301	Tau tubulin kinase 1	UniProtKB/TrEMBL	A0A077ZPC3
18	Trichuris_trichiura_00_050	20001	40000	0.501937	38315	39105	TTRE_0000358401	Centrosomal protein of 41 kDa	UniProtKB/TrEMBL	A0A077Z4A6
19	Trichuris_trichiura_00_051	40001	60000	0.535571	40002	43897	TTRE_0000389701	Diphthine synthase	UniProtKB/TrEMBL	A0A077Z758
20	Trichuris_trichiura_00_051	40001	60000	0.535571	43967	45382	TTRE_0000389801	Programmed cell death protein 10	UniProtKB/TrEMBL	A0A077ZA84
21	Trichuris_trichiura_00_057	1	20000	0.521309	16757	18696	TTRE_0000831601
22	Trichuris_trichiura_1_001	200001	220000	0.666409	202335	203062	TTRE_0000065301
23	Trichuris_trichiura_1_001	200001	220000	0.666409	218214	218753	TTRE_0000065201	Abundant larval transcript 2 (Alt2) protein	UniProtKB/TrEMBL	A0A077YY61
24	Trichuris_trichiura_1_001	320001	340000	0.617177	320210	321915	TTRE_0000621701	Lysosomal associated transmembrane protein	UniProtKB/TrEMBL	A0A077ZBZ2
25	Trichuris_trichiura_1_001	320001	340000	0.617177	333865	338397	TTRE_0000650401	RNA polymerase associated protein CTR9	UniProtKB/TrEMBL	A0A077ZEE6
26	Trichuris_trichiura_1_001	500001	520000	0.87702	506168	513117	TTRE_0000249601	Zinc finger homeobox protein 3	UniProtKB/TrEMBL	A0A077Z2H2
27	Trichuris_trichiura_1_001	500001	520000	0.87702	506434	506679	TTRE_0000249501
28	Trichuris_trichiura_1_001	780001	800000	0.71572	788172	789305	TTRE_0000251001	Cuticle collagen 34	UniProtKB/TrEMBL	A0A077Z6F5
29	Trichuris_trichiura_1_001	780001	800000	0.71572	797826	798107	TTRE_0000250901
30	Trichuris_trichiura_1_001	800001	820000	0.716423	800235	804574	TTRE_0000250801	Semaphorin 2a	UniProtKB/TrEMBL	A0A077Z3K8
31	Trichuris_trichiura_1_001	800001	820000	0.716423	805216	808083	TTRE_0000250701	Feline leukemia virus subgroup C	UniProtKB/TrEMBL	A0A077Z1A9
32	Trichuris_trichiura_1_001	800001	820000	0.716423	816153	820000	TTRE_0000250601	Putative neuropeptide G protein-coupled receptor	UniProtKB/TrEMBL	A0A077Z2H9
33	Trichuris_trichiura_1_001	820001	840000	0.716863	820002	820827	TTRE_0000250601	Putative neuropeptide G protein-coupled receptor	UniProtKB/TrEMBL	A0A077Z2H9
34	Trichuris_trichiura_1_001	820001	840000	0.716863	833383	835693	TTRE_0000250501	PP2C domain containing protein	UniProtKB/TrEMBL	A0A077Z6F0
35	Trichuris_trichiura_1_001	820001	840000	0.716863	839003	839879	TTRE_0000250401	Pkinase domain containing protein	UniProtKB/TrEMBL	A0A077Z326
36	Trichuris_trichiura_1_001	1060001	1080000	0.629853	1060002	1062984	TTRE_0000015401	Diacylglycerol kinase	UniProtKB/TrEMBL	A0A077YZT9
37	Trichuris_trichiura_1_001	1060001	1080000	0.629853	1063290	1064039	TTRE_0000015301
38	Trichuris_trichiura_1_001	1060001	1080000	0.629853	1064666	1066626	TTRE_0000015201	Phos pyr kin domain containing protein	UniProtKB/TrEMBL	A0A077YWQ3
39	Trichuris_trichiura_1_001	1060001	1080000	0.629853	1069405	1070396	TTRE_0000015101
40	Trichuris_trichiura_1_001	1060001	1080000	0.629853	1072652	1077410	TTRE_0000015001	Pkinase Tyr domain containing protein	UniProtKB/TrEMBL	A0A077YVS7
41	Trichuris_trichiura_1_001	1060001	1080000	0.629853	1079286	1079651	TTRE_0000014901
42	Trichuris_trichiura_1_001	5920001	5940000	0.640502	5920002	5931038	TTRE_0000421901
43	Trichuris_trichiura_1_001	5920001	5940000	0.640502	5931611	5931970	TTRE_0000421801
44	Trichuris_trichiura_1_001	5920001	5940000	0.640502	5935551	5935988	TTRE_0000421701
45	Trichuris_trichiura_1_001	6260001	6280000	0.635843	6263289	6263749	TTRE_0000768501	Mediator of RNA polymerase II transcription subunit 11	UniProtKB/TrEMBL	A0A077ZIC5
46	Trichuris_trichiura_1_001	6260001	6280000	0.635843	6267340	6268305	TTRE_0000768601	Ribosomal protein L7	UniProtKB/TrEMBL	A0A077ZHQ9
47	Trichuris_trichiura_1_001	6260001	6280000	0.635843	6278443	6278859	TTRE_0000768701	Glutaredoxin	UniProtKB/TrEMBL	A0A077ZL64
48	Trichuris_trichiura_1_001	6380001	6400000	0.748508	6380743	6390600	TTRE_0000572801	Cytochrome c oxidase assembly protein COX11, mito chondrial	UniProtKB/TrEMBL	A0A077ZAW0
49	Trichuris_trichiura_1_001	6380001	6400000	0.748508	6396274	6400000	TTRE_0000572901	6-phosphofructokinase	UniProtKB/TrEMBL	A0A077ZAM2
50	Trichuris_trichiura_1_001	6560001	6580000	0.592386	6564878	6580000	TTRE_0000665901	Doublecortin family protein	UniProtKB/TrEMBL	A0A077ZES5
51	Trichuris_trichiura_1_001	6660001	6680000	0.619902	6660257	6662072	TTRE_0000273101
52	Trichuris_trichiura_1_001	6660001	6680000	0.619902	6665842	6666358	TTRE_0000273001	PDZ domain containing protein	UniProtKB/TrEMBL	A0A077Z711
53	Trichuris_trichiura_1_001	6660001	6680000	0.619902	6671418	6675244	TTRE_0000272901	PDZ domain containing protein	UniProtKB/TrEMBL	A0A077Z3N1
54	Trichuris_trichiura_1_001	7880001	7900000	0.591487	7889235	7896875	TTRE_0000562701	Protein tag isoform	UniProtKB/TrEMBL	A0A077ZAN4
55	Trichuris_trichiura_1_001	7880001	7900000	0.591487	7897755	7899176	TTRE_0000562601
56	Trichuris_trichiura_1_001	8220001	8240000	0.607754	8222244	8229636	TTRE_0000242401	Peptidase M28 domain containing protein	UniProtKB/TrEMBL	A0A077Z2U2
57	Trichuris_trichiura_1_001	8220001	8240000	0.607754	8233188	8239955	TTRE_0000242301	Nicotinic acetylcholine receptor alpha subunit	UniProtKB/TrEMBL	A0A077Z3D5
58	Trichuris_trichiura_1_001	8240001	8260000	0.577904	8240425	8256348	TTRE_0000242201	Epidermal growth factor receptor	UniProtKB/TrEMBL	A0A077Z161
59	Trichuris_trichiura_1_001	8660001	8680000	0.583201	8666995	8667951	TTRE_0000688301
60	Trichuris_trichiura_1_001	8680001	8700000	0.587239	8681836	8682477	TTRE_0000575301	Enhancer of split mgamma protein	UniProtKB/TrEMBL	A0A077ZAY0
61	Trichuris_trichiura_1_001	8680001	8700000	0.587239	8695199	8696068	TTRE_0000575201
62	Trichuris_trichiura_1_001	9000001	9020000	0.606951	9000002	9002041	TTRE_0000357801	Clathrin coat assembly protein ap 1	UniProtKB/TrEMBL	A0A077Z5A8
63	Trichuris_trichiura_1_001	9000001	9020000	0.606951	9004603	9007276	TTRE_0000357901	Plasma alpha l fucosidase	UniProtKB/TrEMBL	A0A077Z4A2
64	Trichuris_trichiura_1_001	9000001	9020000	0.606951	9015761	9017321	TTRE_0000358001	Inositol monophosphatase 3	UniProtKB/TrEMBL	A0A077Z6Q9
65	Trichuris_trichiura_1_001	11040001	11060000	0.582136	11048852	11050302	TTRE_0000281001	Ion trans 2 domain containing protein	UniProtKB/TrEMBL	A0A077Z790
66	Trichuris_trichiura_1_002	960001	980000	0.613099	966217	966974	TTRE_0000318001	Putative phosphatidate cytidylyltransferase	UniProtKB/TrEMBL	A0A077Z881
67	Trichuris_trichiura_1_002	960001	980000	0.613099	967667	968074	TTRE_0000318101	Small nuclear ribonucleoprotein F	UniProtKB/TrEMBL	A0A077Z4A7
68	Trichuris_trichiura_1_002	960001	980000	0.613099	971196	971858	TTRE_0000318201	Defensin-related cryptdin-related sequence 10	UniProtKB/TrEMBL	A0A077Z327
69	Trichuris_trichiura_1_002	2540001	2560000	0.599936	2543631	2544662	TTRE_0000718101	Autophagy protein 5	UniProtKB/TrEMBL	A0A077ZJT2
70	Trichuris_trichiura_1_002	2540001	2560000	0.599936	2549291	2554956	TTRE_0000718001
71	Trichuris_trichiura_1_002	3680001	3700000	0.592139	3682509	3683757	TTRE_0000933701
72	Trichuris_trichiura_1_002	3680001	3700000	0.592139	3687251	3688144	TTRE_0000939901
73	Trichuris_trichiura_1_002	3680001	3700000	0.592139	3699915	3700000	TTRE_0000937701	NADH ubiquinone oxidoreductase ASHI subunit	UniProtKB/TrEMBL	A0A077ZMI1
74	Trichuris_trichiura_1_002	3700001	3720000	0.662423	3700002	3700872	TTRE_0000937701	NADH ubiquinone oxidoreductase ASHI subunit	UniProtKB/TrEMBL	A0A077ZMI1
75	Trichuris_trichiura_1_002	3700001	3720000	0.662423	3705033	3709174	TTRE_0000675401	Adenosylhomocysteinase	UniProtKB/TrEMBL	A0A077ZF21
76	Trichuris_trichiura_1_002	3700001	3720000	0.662423	3712645	3714064	TTRE_0000675501	Homeobox and LIM domain containing protein	UniProtKB/TrEMBL	A0A077ZIK9
77	Trichuris_trichiura_1_002	3760001	3780000	0.647235	3767709	3774716	TTRE_0000559101
78	Trichuris_trichiura_1_002	3960001	3980000	0.623404	3960002	3967361	TTRE_0000295201	COUP transcription factor 1	UniProtKB/TrEMBL	A0A077Z2M5
79	Trichuris_trichiura_1_002	3960001	3980000	0.623404	3972785	3973411	TTRE_0000295101	Ubiquitin conjugating enzyme E2 variant 1	UniProtKB/TrEMBL	A0A077Z3U1
80	Trichuris_trichiura_1_002	3960001	3980000	0.623404	3974921	3978370	TTRE_0000295001	PH and GLTP domain containing protein	UniProtKB/TrEMBL	A0A077Z7N2
81	Trichuris_trichiura_1_002	3960001	3980000	0.623404	3979772	3980000	TTRE_0000294901
82	Trichuris_trichiura_1_002	4340001	4360000	0.581098	4342549	4358780	TTRE_0000259301	Receptor type tyrosine protein phosphatase	UniProtKB/TrEMBL	A0A077Z3S0
83	Trichuris_trichiura_1_002	4760001	4780000	0.580486	4774707	4780000	TTRE_0000002401	Dystrobrevin	UniProtKB/TrEMBL	A0A077YZF1
84	Trichuris_trichiura_1_002	4780001	4800000	0.589016	4780002	4781869	TTRE_0000002401	Dystrobrevin	UniProtKB/TrEMBL	A0A077YZF1
85	Trichuris_trichiura_1_002	4780001	4800000	0.589016	4782147	4783002	TTRE_0000002501	DUF4210 and Chromosome seg domain containing prot ein	UniProtKB/TrEMBL	A0A077YVI3
86	Trichuris_trichiura_1_002	4780001	4800000	0.589016	4796368	4800000	TTRE_0000002601	RBD and RhoGEF domain containing protein	UniProtKB/TrEMBL	A0A077YUL1
87	Trichuris_trichiura_1_003	240001	260000	0.581224	240002	241023	TTRE_0000574301	Splicing factor 3A subunit 3	UniProtKB/TrEMBL	A0A077ZAX1
88	Trichuris_trichiura_1_003	240001	260000	0.581224	243818	250473	TTRE_0000733001	Inositol polyphosphate 5 phosphatase OCRL 1	UniProtKB/TrEMBL	A0A077ZF56
89	Trichuris_trichiura_1_003	240001	260000	0.581224	252345	255958	TTRE_0000733101	Suppressor of lurcher protein 1	UniProtKB/TrEMBL	A0A077ZF25
90	Trichuris_trichiura_1_003	400001	420000	0.728686	400002	409933	TTRE_0000231501	IQ and DIL and Myosin head domain containing prot ein	UniProtKB/TrEMBL	A0A077Z1S4
91	Trichuris_trichiura_1_003	400001	420000	0.728686	419207	420000	TTRE_0000231401
92	Trichuris_trichiura_1_003	480001	500000	0.695564	481227	482151	TTRE_0000230301	Tmemb 161AB domain containing protein	UniProtKB/TrEMBL	A0A077Z2B9
93	Trichuris_trichiura_1_003	480001	500000	0.695564	488163	488864	TTRE_0000230201	HAD 2 domain containing protein	UniProtKB/TrEMBL	A0A077Z2W0
94	Trichuris_trichiura_1_003	480001	500000	0.695564	489524	490222	TTRE_0000230101	HAD 2 domain containing protein	UniProtKB/TrEMBL	A0A077Z0R5
95	Trichuris_trichiura_1_003	480001	500000	0.695564	491658	499861	TTRE_0000230001	Anion exchange protein	UniProtKB/TrEMBL	A0A077Z1R0
96	Trichuris_trichiura_1_003	540001	560000	0.620688	546257	547449	TTRE_0000803001	tRNA pseudouridine synthase	UniProtKB/TrEMBL	A0A077ZH79
97	Trichuris_trichiura_1_003	540001	560000	0.620688	551234	551985	TTRE_0000802901	GTP binding protein ypt7	UniProtKB/TrEMBL	A0A077ZHB9
98	Trichuris_trichiura_1_003	540001	560000	0.620688	557235	558623	TTRE_0000660801	DNA repair protein XRCC1	UniProtKB/TrEMBL	A0A077ZD25
99	Trichuris_trichiura_1_003	560001	580000	0.614164	564829	566394	TTRE_0000660901	GTP binding protein Rhes	UniProtKB/TrEMBL	A0A077ZD71
100	Trichuris_trichiura_1_003	560001	580000	0.614164	572232	573115	TTRE_0000661001	Calmodulin-like protein	UniProtKB/TrEMBL	A0A077ZFJ0
101	Trichuris_trichiura_1_003	580001	600000	0.598433	585525	586451	TTRE_0000661101	TM231 domain containing protein	UniProtKB/TrEMBL	A0A077ZEP4
102	Trichuris_trichiura_1_003	580001	600000	0.598433	586937	587404	TTRE_0000661201	Ribosomal L37 domain containing protein	UniProtKB/TrEMBL	A0A077ZI91
103	Trichuris_trichiura_1_003	580001	600000	0.598433	590634	590900	TTRE_0000661301
104	Trichuris_trichiura_1_003	960001	980000	0.637598	960002	962708	TTRE_0000181101	Agrin	UniProtKB/TrEMBL	A0A077Z0H1
105	Trichuris_trichiura_1_003	960001	980000	0.637598	964115	965422	TTRE_0000181001	Protocadherin Fat 4	UniProtKB/TrEMBL	A0A077Z496
106	Trichuris_trichiura_1_003	960001	980000	0.637598	970382	980000	TTRE_0000180901
107	Trichuris_trichiura_1_004	740001	760000	0.587528	741196	747261	TTRE_0000642001
108	Trichuris_trichiura_1_004	740001	760000	0.587528	756045	760000	TTRE_0000642101	Alanine tRNA ligase, cytoplasmic	UniProtKB/TrEMBL	A0A077ZF15
109	Trichuris_trichiura_1_005	280001	300000	0.708706	280002	293609	TTRE_0000482401	Dynein heavy chain	UniProtKB/TrEMBL	A0A077Z9T7
110	Trichuris_trichiura_1_005	260001	280000	0.827413	261824	280000	TTRE_0000482401	Dynein heavy chain	UniProtKB/TrEMBL	A0A077Z9T7
111	Trichuris_trichiura_1_005	300001	320000	0.825399	302237	303075	TTRE_0000482501	PHTB1 C domain containing protein	UniProtKB/TrEMBL	A0A077ZD65
112	Trichuris_trichiura_1_005	300001	320000	0.825399	308415	315242	TTRE_0000404301	PHTB1 C and PHTB1 N domain containing protein	UniProtKB/TrEMBL	A0A077ZAS1
113	Trichuris_trichiura_1_005	320001	340000	0.582629	322299	323716	TTRE_0000404401	BMP binding endothelial regulator protein	UniProtKB/TrEMBL	A0A077Z6G9
114	Trichuris_trichiura_1_005	320001	340000	0.582629	327253	329531	TTRE_0000404501	VWFC domain-containing protein	UniProtKB/TrEMBL	A0A077Z5P1
115	Trichuris_trichiura_1_005	320001	340000	0.582629	329583	330126	TTRE_0000404601
116	Trichuris_trichiura_1_005	680001	700000	0.707431	680002	690602	TTRE_0000253001	Junctophilin 1	UniProtKB/TrEMBL	A0A077Z6H1
117	Trichuris_trichiura_1_005	680001	700000	0.707431	696243	698727	TTRE_0000253101	VWA domain containing protein	UniProtKB/TrEMBL	A0A077Z2K2
118	Trichuris_trichiura_1_005	700001	720000	0.58712	719854	720000	TTRE_0000253201	7tm 1 domain containing protein	UniProtKB/TrEMBL	A0A077Z1C5
119	Trichuris_trichiura_1_005	740001	760000	0.596258	745013	759736	TTRE_0000253301	Peptidase C14 and CARD and GSH synthase and GSH s ynth ATP domain containing protein	UniProtKB/TrEMBL	A0A077Z3M8
120	Trichuris_trichiura_1_005	780001	800000	0.624481	788898	794350	TTRE_0000587001	2 oxoisovalerate dehydrogenase subunit beta	UniProtKB/TrEMBL	A0A077ZDF0
121	Trichuris_trichiura_1_005	800001	820000	0.753337	806692	807882	TTRE_0000587101	Protein FAM46C	UniProtKB/TrEMBL	A0A077ZCK4
122	Trichuris_trichiura_1_005	800001	820000	0.753337	816739	820000	TTRE_0000587201	Phosphate transporter family protein	UniProtKB/TrEMBL	A0A077ZG06
123	Trichuris_trichiura_1_005	880001	900000	0.675073	899417	900000	TTRE_0000314001	Neurocalcin	UniProtKB/TrEMBL	A0A077Z845
124	Trichuris_trichiura_1_005	900001	920000	0.710077	900002	903291	TTRE_0000314001	Neurocalcin	UniProtKB/TrEMBL	A0A077Z845
125	Trichuris_trichiura_1_005	900001	920000	0.710077	907760	908699	TTRE_0000313901
126	Trichuris_trichiura_1_005	900001	920000	0.710077	914334	915639	TTRE_0000313801	26S proteasome non ATPase regulatory subunit 7	UniProtKB/TrEMBL	A0A077Z5D0
127	Trichuris_trichiura_1_005	900001	920000	0.710077	917056	920000	TTRE_0000313701	Tyrosine protein phosphatase corkscrew	UniProtKB/TrEMBL	A0A077Z2Z3
128	Trichuris_trichiura_1_006	360001	380000	0.777174	367362	371124	TTRE_0000617101	CBM 14 and TSP 1 domain containing protein	UniProtKB/TrEMBL	A0A077ZDE6
129	Trichuris_trichiura_1_006	360001	380000	0.777174	371611	372222	TTRE_0000617001
130	Trichuris_trichiura_1_006	680001	700000	0.671803	687016	688255	TTRE_0000460601	Flap endonuclease 1	UniProtKB/TrEMBL	A0A077Z972
131	Trichuris_trichiura_1_006	680001	700000	0.671803	690741	691201	TTRE_0000491801	XPG N domain containing protein	UniProtKB/TrEMBL	A0A077Z8X8
132	Trichuris_trichiura_1_006	680001	700000	0.671803	692846	694793	TTRE_0000491901
133	Trichuris_trichiura_1_006	680001	700000	0.671803	695735	700000	TTRE_0000492001	Viral A-type inclusion protein	UniProtKB/TrEMBL	A0A077ZAL1
134	Trichuris_trichiura_1_006	740001	760000	0.67839	740002	760000	TTRE_0000492501	EF-hand 3 and Spectrin and ZZ and WW and EF-hand 2 domain containing protein	UniProtKB/TrEMBL	A0A077ZAL9
135	Trichuris_trichiura_1_006	760001	780000	0.687189	760002	761912	TTRE_0000492501	EF-hand 3 and Spectrin and ZZ and WW and EF-hand 2 domain containing protein	UniProtKB/TrEMBL	A0A077ZAL9
136	Trichuris_trichiura_1_006	760001	780000	0.687189	764592	780000	TTRE_0000655101	Dystrophin	UniProtKB/TrEMBL	A0A077ZEI5
137	Trichuris_trichiura_1_006	780001	800000	0.725505	780002	788596	TTRE_0000655101	Dystrophin	UniProtKB/TrEMBL	A0A077ZEI5
138	Trichuris_trichiura_1_007	140001	160000	0.638963	140002	144175	TTRE_0000843601	DUF1387 domain containing protein	UniProtKB/TrEMBL	A0A077ZMZ6
139	Trichuris_trichiura_1_007	140001	160000	0.638963	146639	147492	TTRE_0000981701
140	Trichuris_trichiura_1_007	140001	160000	0.638963	151973	152435	TTRE_0000929501	DUF5641 domain-containing protein	UniProtKB/TrEMBL	A0A077ZKL1
141	Trichuris_trichiura_1_007	140001	160000	0.638963	152990	153461	TTRE_0000965501
142	Trichuris_trichiura_1_007	160001	180000	0.650505	173853	174302	TTRE_0000843501	BrkDBD and HTH Tnp Tc5 domain containing protein	UniProtKB/TrEMBL	A0A077ZK04
143	Trichuris_trichiura_1_007	180001	200000	0.592867	197508	200000	TTRE_0000713701
144	Trichuris_trichiura_2_001	60001	80000	0.641613	60002	61380	TTRE_0000216101	26S proteasome non-ATPase regulatory subunit 13	UniProtKB/TrEMBL	A0A077Z0E2
145	Trichuris_trichiura_2_001	60001	80000	0.641613	73678	74217	TTRE_0000216201	GABAA receptor-associated protein	UniProtKB/TrEMBL	A0A077Z2E9
146	Trichuris_trichiura_2_001	3040001	3060000	0.695272	3040002	3041016	TTRE_0000558501	Vesicular glutamate transporter	UniProtKB/TrEMBL	A0A077ZBU0
147	Trichuris_trichiura_2_001	3040001	3060000	0.695272	3042632	3043236	TTRE_0000558601
148	Trichuris_trichiura_2_001	3040001	3060000	0.695272	3047039	3049788	TTRE_0000558701	Nucleobindin 1	UniProtKB/TrEMBL	A0A077ZAK1
149	Trichuris_trichiura_2_001	7920001	7940000	0.545955	7923257	7923613	TTRE_0000532901	DNA binding protein inhibitor ID 3	UniProtKB/TrEMBL	A0A077Z9Y7
150	Trichuris_trichiura_2_001	7920001	7940000	0.545955	7926573	7927401	TTRE_0000532801	DDRGK domain containing protein	UniProtKB/TrEMBL	A0A077ZED5
151	Trichuris_trichiura_2_001	7920001	7940000	0.545955	7931225	7933611	TTRE_0000532701	WD40 and Prp19 domain containing protein	UniProtKB/TrEMBL	A0A077ZB22
152	Trichuris_trichiura_2_001	7940001	7960000	0.557969	7953610	7953951	TTRE_0000532601	Histone acetyltransferase	UniProtKB/TrEMBL	A0A077ZBZ3
153	Trichuris_trichiura_2_001	7940001	7960000	0.557969	7958576	7960000	TTRE_0000532501	Deoxyribonuclease (DNase) II	UniProtKB/TrEMBL	A0A077Z9A6
154	Trichuris_trichiura_2_001	8620001	8640000	0.566369	8625009	8626640	TTRE_0000784101	Lateral signaling target protein 2	UniProtKB/TrEMBL	A0A077ZGR1
155	Trichuris_trichiura_2_001	8620001	8640000	0.566369	8627251	8627940	TTRE_0000784201
156	Trichuris_trichiura_2_001	8620001	8640000	0.566369	8636799	8637053	TTRE_0000784301	TIL domain containing protein	UniProtKB/TrEMBL	A0A077ZIS5
157	Trichuris_trichiura_2_001	8900001	8920000	0.740042	8904891	8917670	TTRE_0000553701	Solute carrier family 12	UniProtKB/TrEMBL	A0A077ZAG4
158	Trichuris_trichiura_2_001	8900001	8920000	0.740042	8917834	8919186	TTRE_0000553601	60S ribosomal protein L9	UniProtKB/TrEMBL	A0A077ZF43
159	Trichuris_trichiura_2_001	8900001	8920000	0.740042	8919936	8920000	TTRE_0000553501	Pescadillo homolog	UniProtKB/TrEMBL	A0A077ZBN5
160	Trichuris_trichiura_2_001	9100001	9120000	0.660512	9116403	9117599	TTRE_0000688901	Chymotrypsin-elastase inhibitor ixodidin	UniProtKB/TrEMBL	A0A077ZFF3
161	Trichuris_trichiura_2_001	9140001	9160000	0.56744	9145656	9148232	TTRE_0000689001
162	Trichuris_trichiura_2_001	9260001	9280000	0.577505	9260002	9265531	TTRE_0000408901	P proprotein and Peptidase S8 domain containing p rotein	UniProtKB/TrEMBL	A0A077Z6K5
163	Trichuris_trichiura_2_001	9340001	9360000	0.570858	9340002	9340594	TTRE_0000826901	Zf-C3Hc3H domain containing protein	UniProtKB/TrEMBL	A0A077ZHQ3
164	Trichuris_trichiura_2_001	9340001	9360000	0.570858	9355557	9359823	TTRE_0000488401	Sodium:nucleoside cotransporter 2	UniProtKB/TrEMBL	A0A077ZA13
165	Trichuris_trichiura_2_001	10000001	10020000	0.55001	10000002	10000188	TTRE_0000830901
166	Trichuris_trichiura_2_001	10000001	10020000	0.55001	10003493	10004592	TTRE_0000454601
167	Trichuris_trichiura_2_001	10000001	10020000	0.55001	10015502	10017914	TTRE_0000454501	Transmembrane protein 33	UniProtKB/TrEMBL	A0A077ZCE1
168	Trichuris_trichiura_2_001	10360001	10380000	0.587421	10365437	10372018	TTRE_0000717401	Gut specific cysteine proteinase	UniProtKB/TrEMBL	A0A077ZGS3
169	Trichuris_trichiura_2_001	10360001	10380000	0.587421	10374709	10375098	TTRE_0000717501	p450 domain containing protein	UniProtKB/TrEMBL	A0A077ZGA8
170	Trichuris_trichiura_2_001	10360001	10380000	0.587421	10379419	10380000	TTRE_0000717601	Cytochrome P450 1A1	UniProtKB/TrEMBL	A0A077ZJS9
171	Trichuris_trichiura_2_001	10880001	10900000	0.531797	10899678	10900000	TTRE_0000402601	DNA topoisomerase	UniProtKB/TrEMBL	A0A077Z813
172	Trichuris_trichiura_2_001	11600001	11620000	0.645182	11601449	11602465	TTRE_0000647501
173	Trichuris_trichiura_2_001	11600001	11620000	0.645182	11602508	11602783	TTRE_0000647401	UPF0086 domain containing protein	UniProtKB/TrEMBL	A0A077ZEC4
174	Trichuris_trichiura_2_001	11600001	11620000	0.645182	11606682	11609456	TTRE_0000647301
175	Trichuris_trichiura_2_001	12000001	12020000	0.613682	12010185	12010491	TTRE_0000700201	Mediator of rna polymerase ii transcription subun it	UniProtKB/TrEMBL	A0A077ZE84
176	Trichuris_trichiura_2_001	12000001	12020000	0.613682	12019396	12020000	TTRE_0000466601	Serine/threonine-protein phosphatase	UniProtKB/TrEMBL	A0A077Z9P7
177	Trichuris_trichiura_2_001	12020001	12040000	0.577741	12020002	12020277	TTRE_0000466601	Serine/threonine-protein phosphatase	UniProtKB/TrEMBL	A0A077Z9P7
178	Trichuris_trichiura_2_001	12020001	12040000	0.577741	12027821	12029480	TTRE_0000466701	BZIP 2 and Sas10 Utp3 domain containing protein	UniProtKB/TrEMBL	A0A077Z9D5
179	Trichuris_trichiura_2_001	12020001	12040000	0.577741	12032947	12033549	TTRE_0000967901	DUF1758 domain containing protein	UniProtKB/TrEMBL	A0A077ZQY3
180	Trichuris_trichiura_2_001	12020001	12040000	0.577741	12034954	12036436	TTRE_0000870501
181	Trichuris_trichiura_2_001	12020001	12040000	0.577741	12036525	12036822	TTRE_0000601601	DUF5641 domain-containing protein	UniProtKB/TrEMBL	A0A077ZBG4
182	Trichuris_trichiura_2_001	12020001	12040000	0.577741	12038142	12040000	TTRE_0000466801	Pkinase domain containing protein	UniProtKB/TrEMBL	A0A077ZCP9
183	Trichuris_trichiura_2_001	12040001	12060000	0.699652	12040002	12042454	TTRE_0000466801	Pkinase domain containing protein	UniProtKB/TrEMBL	A0A077ZCP9
184	Trichuris_trichiura_2_001	12060001	12080000	0.760671	12060002	12060811	TTRE_0000466901	Patched family protein	UniProtKB/TrEMBL	A0A077Z844
185	Trichuris_trichiura_2_001	12040001	12060000	0.699652	12056391	12060000	TTRE_0000466901	Patched family protein	UniProtKB/TrEMBL	A0A077Z844
186	Trichuris_trichiura_2_001	12060001	12080000	0.760671	12071941	12072438	TTRE_0000467001	Patched domain containing protein	UniProtKB/TrEMBL	A0A077Z7D3
187	Trichuris_trichiura_2_001	12060001	12080000	0.760671	12079509	12079877	TTRE_0000467101	Major sperm protein	UniProtKB/TrEMBL	A0A077Z9P9
188	Trichuris_trichiura_2_001	12140001	12160000	0.568454	12140369	12143164	TTRE_0000863001	Neur chan memb domain containing protein	UniProtKB/TrEMBL	A0A077ZIQ1
189	Trichuris_trichiura_2_001	12160001	12180000	0.568052	12164942	12165402	TTRE_0000760501	Splicing factor, arginine:serine rich 2	UniProtKB/TrEMBL	A0A077ZHJ4
190	Trichuris_trichiura_2_001	12240001	12260000	0.699291	12259359	12260000	TTRE_0000791101	Tyrosine-protein kinase	UniProtKB/TrEMBL	A0A077ZIF1
191	Trichuris_trichiura_2_001	12260001	12280000	0.694903	12260002	12260819	TTRE_0000791101	Tyrosine-protein kinase	UniProtKB/TrEMBL	A0A077ZIF1
192	Trichuris_trichiura_2_001	12280001	12300000	0.57473	12294870	12296752	TTRE_0000861801	Glucoside xylosyltransferase 1	UniProtKB/TrEMBL	A0A077ZKH3
193	Trichuris_trichiura_2_001	12280001	12300000	0.57473	12297028	12298349	TTRE_0000861701
194	Trichuris_trichiura_2_001	12300001	12320000	0.650404	12308878	12310276	TTRE_0000771801	Putative eukaryotic translation initiation factor transporter eukaryotic translation initiation factor nuc lear import factor (Predicted)	UniProtKB/TrEMBL	A0A077ZHT6
195	Trichuris_trichiura_2_001	12320001	12340000	0.555686	12330458	12334455	TTRE_0000918201	Zinc knuckle protein	UniProtKB/TrEMBL	A0A077ZKB3
196	Trichuris_trichiura_2_001	12340001	12360000	0.636276	12340656	12342806	TTRE_0000852201	Beta catenin protein 1 like	UniProtKB/TrEMBL	A0A077ZK90
197	Trichuris_trichiura_2_001	12340001	12360000	0.636276	12347796	12348551	TTRE_0000852101
198	Trichuris_trichiura_2_001	12340001	12360000	0.636276	12355341	12357324	TTRE_0000839401	Proteasom PSMB domain containing protein	UniProtKB/TrEMBL	A0A077ZJX0
199	Trichuris_trichiura_2_001	12340001	12360000	0.636276	12357398	12358924	TTRE_0000839301	40S ribosomal protein S3a	UniProtKB/TrEMBL	A0A077ZK25
200	Trichuris_trichiura_2_001	12360001	12380000	0.555844	12366574	12369600	TTRE_0000838601	Fibroblast growth factor	UniProtKB/TrEMBL	A0A077ZK20
201	Trichuris_trichiura_2_001	12400001	12420000	0.561462	12413737	12414268	TTRE_0000812101	Fibroblast growth factor 16	UniProtKB/TrEMBL	A0A077ZHI5
202	Trichuris_trichiura_2_001	12500001	12520000	0.55636	12502385	12502792	TTRE_0000827001	FARP domain containing protein	UniProtKB/TrEMBL	A0A077ZJR9
203	Trichuris_trichiura_2_001	12500001	12520000	0.55636	12515840	12520000	TTRE_0000760801
204	Trichuris_trichiura_2_001	12560001	12580000	0.782223	12579894	12580000	TTRE_0000665801	26S protease regulatory subunit 8	UniProtKB/TrEMBL	A0A077ZFM1
205	Trichuris_trichiura_2_001	12600001	12620000	0.544275	12601001	12603636	TTRE_0000852901	Cation ATPase N and E1-E2 ATPase domain containin g protein	UniProtKB/TrEMBL	A0A077ZK94
206	Trichuris_trichiura_2_001	12600001	12620000	0.544275	12615511	12620000	TTRE_0000653301	Calcium-transporting ATPase	UniProtKB/TrEMBL	A0A077ZCT9
207	Trichuris_trichiura_2_001	12620001	12640000	0.801828	12620002	12624601	TTRE_0000653301	Calcium-transporting ATPase	UniProtKB/TrEMBL	A0A077ZCT9
208	Trichuris_trichiura_2_001	12640001	12660000	0.815171	12643120	12644076	TTRE_0000653201
209	Trichuris_trichiura_2_001	12640001	12660000	0.815171	12655405	12655898	TTRE_0000653101
210	Trichuris_trichiura_2_001	12660001	12680000	0.783639	12664196	12665822	TTRE_0000699001	Kunitz BPTI and Lustrin cystein domain containing protein	UniProtKB/TrEMBL	A0A077ZE89
211	Trichuris_trichiura_2_001	12660001	12680000	0.783639	12672868	12673711	TTRE_0000699101	Lustrin cystein domain containing protein	UniProtKB/TrEMBL	A0A077ZE76
212	Trichuris_trichiura_2_001	12660001	12680000	0.783639	12673732	12675452	TTRE_0000699201	Lustrin cystein domain containing protein	UniProtKB/TrEMBL	A0A077ZGE7
213	Trichuris_trichiura_2_001	12680001	12700000	0.89026	12685027	12688506	TTRE_0000699301	Integrase_H2C2 domain-containing protein	UniProtKB/TrEMBL	A0A077ZFT8
214	Trichuris_trichiura_2_001	12680001	12700000	0.89026	12699815	12700000	TTRE_0000780901
215	Trichuris_trichiura_2_001	12700001	12720000	0.846644	12700002	12700060	TTRE_0000780901
216	Trichuris_trichiura_2_001	12720001	12740000	0.811096	12720048	12721237	TTRE_0000781001	LBP BPI CETP C domain containing protein	UniProtKB/TrEMBL	A0A077ZLE8
217	Trichuris_trichiura_2_001	12720001	12740000	0.811096	12721638	12722306	TTRE_0000755801	Ribosomal S10 domain containing protein	UniProtKB/TrEMBL	A0A077ZI30
218	Trichuris_trichiura_2_001	12720001	12740000	0.811096	12733554	12734606	TTRE_0000755701
219	Trichuris_trichiura_2_001	12740001	12760000	0.647723	12757055	12757744	TTRE_0000859601	Hexamethylene bis acetamide inducible 1	UniProtKB/TrEMBL	A0A077ZIL8
220	Trichuris_trichiura_2_001	12760001	12780000	0.649581	12764137	12764575	TTRE_0000910501	DUF572 domain containing protein	UniProtKB/TrEMBL	A0A077ZLY0
221	Trichuris_trichiura_2_001	12760001	12780000	0.649581	12776908	12780000	TTRE_0000562301	Transcription elongation factor SPT6	UniProtKB/TrEMBL	A0A077ZAB6
222	Trichuris_trichiura_2_001	13340001	13360000	0.82025	13351050	13351503	TTRE_0000862001	Putative microtubule severing protein katanin p80 subunit b	UniProtKB/TrEMBL	A0A077ZIP3
223	Trichuris_trichiura_2_001	13380001	13400000	0.67636	13391269	13400000	TTRE_0000600201	Zf-C4 and Hormone recep domain containing protein	UniProtKB/TrEMBL	A0A077ZCZ9
224	Trichuris_trichiura_2_001	13400001	13420000	0.678806	13400002	13403345	TTRE_0000600201	Zf-C4 and Hormone recep domain containing protein	UniProtKB/TrEMBL	A0A077ZCZ9
225	Trichuris_trichiura_2_001	13380001	13400000	0.67636	13399620	13399955	TTRE_0000600301
226	Trichuris_trichiura_2_001	13400001	13420000	0.678806	13410004	13412017	TTRE_0000600101	Fanconi anemia group M protein	UniProtKB/TrEMBL	A0A077ZDX5
227	Trichuris_trichiura_2_001	13420001	13440000	0.755065	13421075	13422532	TTRE_0000600001
228	Trichuris_trichiura_2_001	13440001	13460000	0.532155	13450470	13454523	TTRE_0000786901	Helicase C and ResIII domain containing protein	UniProtKB/TrEMBL	A0A077ZIV2
229	Trichuris_trichiura_2_001	13460001	13480000	0.635658	13477842	13479081	TTRE_0000845101	Beta-mannosyltransferase bre- beta mannosyltran sferase egh	UniProtKB/TrEMBL	A0A077ZK68
230	Trichuris_trichiura_2_001	13480001	13500000	0.603095	13486892	13487546	TTRE_0000845201
231	Trichuris_trichiura_2_001	13480001	13500000	0.603095	13496634	13497416	TTRE_0000815001	Glyco trans 2 3 domain containing protein	UniProtKB/TrEMBL	A0A077ZMC4
232	Trichuris_trichiura_2_001	13500001	13520000	0.696042	13504523	13504813	TTRE_0000815101	Cytochrome p450 oxidoreductase	UniProtKB/TrEMBL	A0A077ZHK8
233	Trichuris_trichiura_2_001	13540001	13560000	0.69881	13546805	13547000	TTRE_0000922901
234	Trichuris_trichiura_2_001	13560001	13580000	0.580035	13565778	13566567	TTRE_0000932201	Remark: the protein is only the half of the lengt h of PTH11	UniProtKB/TrEMBL	A0A077ZMF8
235	Trichuris_trichiura_2_001	13560001	13580000	0.580035	13577955	13578248	TTRE_0000980901	Dispersed gene family protein 1 (DGF-1)	UniProtKB/TrEMBL	A0A077ZR91
236	Trichuris_trichiura_2_001	13620001	13640000	0.876862	13632999	13633325	TTRE_0000873201
237	Trichuris_trichiura_2_001	13640001	13660000	0.858948	13658478	13659027	TTRE_0000850701	NIDO domain containing protein	UniProtKB/TrEMBL	A0A077ZIF4
238	Trichuris_trichiura_2_001	13660001	13680000	0.606519	13665067	13669229	TTRE_0000833501	AMOP and VWD domain containing protein	UniProtKB/TrEMBL	A0A077ZJX1
239	Trichuris_trichiura_2_001	14260001	14280000	0.687095	14261571	14261884	TTRE_0000975601
240	Trichuris_trichiura_2_001	14260001	14280000	0.687095	14262540	14262851	TTRE_0000939001
241	Trichuris_trichiura_2_001	14260001	14280000	0.687095	14263447	14263963	TTRE_0000967101
242	Trichuris_trichiura_2_001	14260001	14280000	0.687095	14269891	14270511	TTRE_0000941601
243	Trichuris_trichiura_2_001	14260001	14280000	0.687095	14277220	14277804	TTRE_0000944201
244	Trichuris_trichiura_2_001	14260001	14280000	0.687095	14277572	14277827	TTRE_0000966601
245	Trichuris_trichiura_2_001	14260001	14280000	0.687095	14278104	14278296	TTRE_0000941401
246	Trichuris_trichiura_2_001	14260001	14280000	0.687095	14278404	14278769	TTRE_0000941501
247	Trichuris_trichiura_2_001	14260001	14280000	0.687095	14279736	14280000	TTRE_0000940801
248	Trichuris_trichiura_2_001	14300001	14320000	0.535879	14302545	14304289	TTRE_0000939101
249	Trichuris_trichiura_2_001	14300001	14320000	0.535879	14304376	14304996	TTRE_0000973901
250	Trichuris_trichiura_2_001	14300001	14320000	0.535879	14311616	14311927	TTRE_0000946401
251	Trichuris_trichiura_2_001	14300001	14320000	0.535879	14312319	14313529	TTRE_0000966501
252	Trichuris_trichiura_2_001	14300001	14320000	0.535879	14314133	14314460	TTRE_0000980501
253	Trichuris_trichiura_2_001	14300001	14320000	0.535879	14314530	14314945	TTRE_0000921801	R2 protein	UniProtKB/TrEMBL	A0A077ZM55
254	Trichuris_trichiura_2_001	15360001	15380000	0.563143	15361705	15366277	TTRE_0000797801
255	Trichuris_trichiura_2_001	15560001	15580000	0.653874	15564640	15566770	TTRE_0000691401
256	Trichuris_trichiura_2_001	15560001	15580000	0.653874	15570814	15572289	TTRE_0000805201
257	Trichuris_trichiura_2_001	15560001	15580000	0.653874	15576026	15577918	TTRE_0000805301	Pleiotropic regulator 1	UniProtKB/TrEMBL	A0A077ZJ98
258	Trichuris_trichiura_2_001	16180001	16200000	0.637513	16180002	16181172	TTRE_0000790501	E3 ubiquitin protein ligase RING2 A	UniProtKB/TrEMBL	A0A077ZIX9
259	Trichuris_trichiura_2_001	16180001	16200000	0.637513	16183472	16183897	TTRE_0000900701
260	Trichuris_trichiura_2_001	18380001	18400000	0.56015	18380002	18388828	TTRE_0000411301
261	Trichuris_trichiura_2_001	18380001	18400000	0.56015	18399646	18400000	TTRE_0000411401	Patched domain containing protein	UniProtKB/TrEMBL	A0A077ZB01
262	Trichuris_trichiura_2_001	18400001	18420000	0.703413	18400002	18402745	TTRE_0000411401	Patched domain containing protein	UniProtKB/TrEMBL	A0A077ZB01
263	Trichuris_trichiura_2_001	18400001	18420000	0.703413	18411120	18412782	TTRE_0000411501	Protein srx protein npr protein cbr srx-1 prot ein cbr npr-19 cre srx-64 protein cre npr-19 protein	UniProtKB/TrEMBL	A0A077Z6M5
264	Trichuris_trichiura_2_001	18420001	18440000	0.720763	18436815	18439475	TTRE_0000592901	DUF2435 domain containing protein	UniProtKB/TrEMBL	A0A077ZBC6
265	Trichuris_trichiura_2_001	18620001	18640000	0.755948	18631289	18631594	TTRE_0000423201
266	Trichuris_trichiura_2_001	19080001	19100000	0.574365	19094172	19095241	TTRE_0000644801	Tfb4 domain containing protein	UniProtKB/TrEMBL	A0A077ZEA5
267	Trichuris_trichiura_2_001	20280001	20300000	0.669926	20290701	20294468	TTRE_0000574101	Ldl recept a and EGF CA domain containing protein	UniProtKB/TrEMBL	A0A077ZC72
268	Trichuris_trichiura_2_001	20280001	20300000	0.669926	20298817	20300000	TTRE_0000574001	Transmembrane cell adhesion receptor mua 3	UniProtKB/TrEMBL	A0A077ZD21
269	Trichuris_trichiura_2_001	20400001	20420000	0.565955	20400002	20402967	TTRE_0000152201	Protein ACL-5, isoform b	UniProtKB/TrEMBL	A0A077Z0N5
270	Trichuris_trichiura_2_001	20400001	20420000	0.565955	20409474	20410943	TTRE_0000152301	Exo endo phos domain containing protein	UniProtKB/TrEMBL	A0A077YZT4
271	Trichuris_trichiura_2_001	20400001	20420000	0.565955	20416211	20420000	TTRE_0000152401	Fibroblast growth factor receptor	UniProtKB/TrEMBL	A0A077Z3G5
272	Trichuris_trichiura_2_001	21340001	21360000	0.641683	21342420	21346660	TTRE_0000667301	Disorganized muscle protein 1	UniProtKB/TrEMBL	A0A077ZFM9
273	Trichuris_trichiura_2_001	25800001	25820000	0.546736	25803186	25807953	TTRE_0000892701	FDX-ACB and DUF2431 domain containing protein	UniProtKB/TrEMBL	A0A077ZP97
274	Trichuris_trichiura_2_001	25800001	25820000	0.546736	25812364	25813080	TTRE_0000955401	Major sperm protein	UniProtKB/TrEMBL	A0A077ZLC5
275	Trichuris_trichiura_2_001	25800001	25820000	0.546736	25817316	25817594	TTRE_0000490801	U6 snRNA-associated Sm-like protein LSm5	UniProtKB/TrEMBL	A0A077ZAI7
276	Trichuris_trichiura_2_001	25800001	25820000	0.546736	25817964	25820000	TTRE_0000490601	Arf GAP with GTPase, ANK repeat and PH	UniProtKB/TrEMBL	A0A077Z8V0
277	Trichuris_trichiura_2_001	28500001	28520000	0.57517	28501398	28501865	TTRE_0000862401
278	Trichuris_trichiura_2_001	28500001	28520000	0.57517	28502741	28503829	TTRE_0000862501	Cation efflux family protein	UniProtKB/TrEMBL	A0A077ZIP7
279	Trichuris_trichiura_2_001	28500001	28520000	0.57517	28505494	28509263	TTRE_0000862601	General transcription factor 3C	UniProtKB/TrEMBL	A0A077ZIP4
280	Trichuris_trichiura_2_001	28500001	28520000	0.57517	28510879	28511522	TTRE_0000862701	Membrane associated progesterone receptor	UniProtKB/TrEMBL	A0A077ZKP3
281	Trichuris_trichiura_2_001	28500001	28520000	0.57517	28514510	28516242	TTRE_0000316201	Dopa decarboxylase	UniProtKB/TrEMBL	A0A077Z312
282	Trichuris_trichiura_2_001	28500001	28520000	0.57517	28518761	28520000	TTRE_0000316101	CDC45 domain containing protein	UniProtKB/TrEMBL	A0A077Z495
283	Trichuris_trichiura_2_001	28520001	28540000	0.632845	28520002	28521786	TTRE_0000316101	CDC45 domain containing protein	UniProtKB/TrEMBL	A0A077Z495
284	Trichuris_trichiura_2_001	28520001	28540000	0.632845	28523805	28525686	TTRE_0000316001	Inward rectifier potassium channel irk-1	UniProtKB/TrEMBL	A0A077Z862
285	Trichuris_trichiura_2_001	28520001	28540000	0.632845	28536408	28537124	TTRE_0000315901
286	Trichuris_trichiura_2_001	28520001	28540000	0.632845	28538047	28540000	TTRE_0000315801	Dicer dimer and Helicase C and PAZ and Ribonuclea se 3 domain containing protein	UniProtKB/TrEMBL	A0A077Z5F4
287	Trichuris_trichiura_2_001	28560001	28580000	0.583975	28560002	28567520	TTRE_0000315601	Proton myo inositol cotransporter	UniProtKB/TrEMBL	A0A077Z491
288	Trichuris_trichiura_2_001	28580001	28600000	0.602663	28580002	28584460	TTRE_0000315501	SMC N domain containing protein	UniProtKB/TrEMBL	A0A077Z858
289	Trichuris_trichiura_2_001	28560001	28580000	0.583975	28576403	28580000	TTRE_0000315501	SMC N domain containing protein	UniProtKB/TrEMBL	A0A077Z858
290	Trichuris_trichiura_2_001	28580001	28600000	0.602663	28585694	28586965	TTRE_0000315401	Ornithine aminotransferase	UniProtKB/TrEMBL	A0A077Z4V5
291	Trichuris_trichiura_2_001	28580001	28600000	0.602663	28594589	28596822	TTRE_0000315301	Vesicular glutamate transporter 1	UniProtKB/TrEMBL	A0A077Z5E7
292	Trichuris_trichiura_2_001	28580001	28600000	0.602663	28597864	28599344	TTRE_0000315201	Tetraspanin	UniProtKB/TrEMBL	A0A077Z304
293	Trichuris_trichiura_2_001	28640001	28660000	0.619518	28640002	28642104	TTRE_0000314601	Liprin-alpha	UniProtKB/TrEMBL	A0A077Z483
294	Trichuris_trichiura_2_001	28640001	28660000	0.619518	28642979	28643812	TTRE_0000314501	UvdE domain containing protein	UniProtKB/TrEMBL	A0A077Z850
295	Trichuris_trichiura_2_001	28640001	28660000	0.619518	28655349	28658939	TTRE_0000209601	ECH domain containing protein	UniProtKB/TrEMBL	A0A077Z1N9
296	Trichuris_trichiura_2_001	28660001	28680000	0.585846	28660164	28661952	TTRE_0000209701	Zf-H2C2 2 domain containing protein	UniProtKB/TrEMBL	A0A077Z569
297	Trichuris_trichiura_2_001	28660001	28680000	0.585846	28662030	28669105	TTRE_0000209801
298	Trichuris_trichiura_2_001	28660001	28680000	0.585846	28676235	28680000	TTRE_0000209901	DNA-directed RNA polymerase subunit	UniProtKB/TrEMBL	A0A077Z093
299	Trichuris_trichiura_3_001	780001	800000	0.562796	780002	781485	TTRE_0000044801	Tetratricopeptide repeat containing	UniProtKB/TrEMBL	A0A077YWV6
300	Trichuris_trichiura_3_001	780001	800000	0.562796	781564	782109	TTRE_0000044701	Caenorhabditis elegans ly 6 protein	UniProtKB/TrEMBL	A0A077YXL8
301	Trichuris_trichiura_3_001	780001	800000	0.562796	787885	788361	TTRE_0000044601
302	Trichuris_trichiura_3_001	780001	800000	0.562796	791323	793245	TTRE_0000044501	WW and adh short domain containing protein	UniProtKB/TrEMBL	A0A077YWN2
303	Trichuris_trichiura_3_001	780001	800000	0.562796	793433	795216	TTRE_0000044401	Acetylcholine receptor subunit alpha type	UniProtKB/TrEMBL	A0A077Z0S2
304	Trichuris_trichiura_3_001	780001	800000	0.562796	798591	799516	TTRE_0000044301	Ras c3 botulinum toxin substrate 1	UniProtKB/TrEMBL	A0A077YWV3
305	Trichuris_trichiura_3_001	8380001	8400000	0.56373	8385326	8386396	TTRE_0000005601	Acyltransferase domain containing protein	UniProtKB/TrEMBL	A0A077YUN7
306	Trichuris_trichiura_3_001	8380001	8400000	0.56373	8396773	8400000	TTRE_0000005701	Protein CBG05848	UniProtKB/TrEMBL	A0A077YWH8
307	Trichuris_trichiura_3_001	8540001	8560000	0.566799	8541404	8549659	TTRE_0000008301	Sulfate tra GLY and STAS and Sulfate transp domai n containing protein	UniProtKB/TrEMBL	A0A077YVP6
308	Trichuris_trichiura_3_001	8540001	8560000	0.566799	8551043	8552247	TTRE_0000008401	Acetyltransf 1 domain containing protein	UniProtKB/TrEMBL	A0A077YZL8
309	Trichuris_trichiura_3_001	8540001	8560000	0.566799	8558685	8560000	TTRE_0000008501	Laminin G 2 and EGF and Cadherin and Laminin EGF domain containing protein	UniProtKB/TrEMBL	A0A077YVM5
310	Trichuris_trichiura_3_001	8560001	8580000	0.659034	8560002	8571794	TTRE_0000008501	Laminin G 2 and EGF and Cadherin and Laminin EGF domain containing protein	UniProtKB/TrEMBL	A0A077YVM5
311	Trichuris_trichiura_3_001	9020001	9040000	0.576414	9023947	9025024	TTRE_0000074901	Paired box protein	UniProtKB/TrEMBL	A0A077YWQ8
312	Trichuris_trichiura_3_001	9020001	9040000	0.576414	9024932	9027875	TTRE_0000074801	Sorting nexin 6	UniProtKB/TrEMBL	A0A077YXI6
313	Trichuris_trichiura_3_001	9020001	9040000	0.576414	9030177	9033259	TTRE_0000074701	Serine palmitoyltransferase 2	UniProtKB/TrEMBL	A0A077Z1P5
314	Trichuris_trichiura_3_002	1	20000	0.706519	19991	20000	TTRE_0000965701
315	Trichuris_trichiura_3_002	1460001	1480000	0.598864	1467333	1467953	TTRE_0000729101	Bcl 2:adenovirus E1B 19K interacting protein 3	UniProtKB/TrEMBL	A0A077ZEY8
316	Trichuris_trichiura_3_002	1460001	1480000	0.598864	1468673	1473095	TTRE_0000729001	CCAAT:enhancer binding protein zeta	UniProtKB/TrEMBL	A0A077ZF17
317	Trichuris_trichiura_3_002	1460001	1480000	0.598864	1473717	1475414	TTRE_0000728901	Trehalase	UniProtKB/TrEMBL	A0A077ZK08
318	Trichuris_trichiura_3_002	1460001	1480000	0.598864	1476251	1476726	TTRE_0000728801	DNA directed RNA polymerase II subunit RPB9	UniProtKB/TrEMBL	A0A077ZGL6
319	Trichuris_trichiura_3_002	1460001	1480000	0.598864	1477195	1480000	TTRE_0000728701	Lysine specific demethylase 6a	UniProtKB/TrEMBL	A0A077ZH12
320	Trichuris_trichiura_3_002	1480001	1500000	0.672795	1480002	1483257	TTRE_0000728701	Lysine specific demethylase 6a	UniProtKB/TrEMBL	A0A077ZH12
321	Trichuris_trichiura_3_002	1480001	1500000	0.672795	1488675	1490676	TTRE_0000614401	PAN 1 domain containing protein	UniProtKB/TrEMBL	A0A077ZE86
322	Trichuris_trichiura_3_002	1480001	1500000	0.672795	1491856	1493402	TTRE_0000614301	EB module family protein	UniProtKB/TrEMBL	A0A077ZBS3
323	Trichuris_trichiura_3_002	1480001	1500000	0.672795	1496826	1497578	TTRE_0000614201	Homeobox protein ceh-30	UniProtKB/TrEMBL	A0A077ZBT4
324	Trichuris_trichiura_3_002	1480001	1500000	0.672795	1499067	1500000	TTRE_0000614101	BarH 2 homeobox protein like	UniProtKB/TrEMBL	A0A077ZGU8
325	Trichuris_trichiura_3_002	1940001	1960000	0.748943	1944255	1945453	TTRE_0000356401	Protein unc-1	UniProtKB/TrEMBL	A0A077Z488
326	Trichuris_trichiura_3_002	1960001	1980000	0.669374	1969578	1979136	TTRE_0000356501	Glypican domain containing protein	UniProtKB/TrEMBL	A0A077Z6P9
327	Trichuris_trichiura_3_002	1960001	1980000	0.669374	1978307	1979129	TTRE_0000356601
328	Trichuris_trichiura_3_002	2020001	2040000	0.535024	2020002	2020678	TTRE_0000620401	Cullin 4B	UniProtKB/TrEMBL	A0A077ZDI3
329	Trichuris_trichiura_3_002	2020001	2040000	0.535024	2023015	2023674	TTRE_0000620501	Sumo conjugating enzyme ubc sumo-conjugating en zyme ubc	UniProtKB/TrEMBL	A0A077ZGZ7
330	Trichuris_trichiura_3_002	2020001	2040000	0.535024	2025111	2035714	TTRE_0000620601	Multidrug resistance associated protein 4	UniProtKB/TrEMBL	A0A077ZBZ1
331	Trichuris_trichiura_3_002	2260001	2280000	0.604959	2265329	2267852	TTRE_0000169701	Anoctamin	UniProtKB/TrEMBL	A0A077YZB4
332	Trichuris_trichiura_3_002	2260001	2280000	0.604959	2279404	2280000	TTRE_0000169801	Anoctamin	UniProtKB/TrEMBL	A0A077Z135
333	Trichuris_trichiura_3_002	2280001	2300000	0.592114	2280002	2282045	TTRE_0000169801	Anoctamin	UniProtKB/TrEMBL	A0A077Z135
334	Trichuris_trichiura_3_002	2280001	2300000	0.592114	2291490	2291987	TTRE_0000169901
335	Trichuris_trichiura_3_002	2280001	2300000	0.592114	2299304	2300000	TTRE_0000170001	Tmemb cc2 domain containing protein	UniProtKB/TrEMBL	A0A077Z3X7
336	Trichuris_trichiura_3_002	2560001	2580000	0.584905	2560209	2560484	TTRE_0000254201
337	Trichuris_trichiura_3_002	2560001	2580000	0.584905	2560515	2561799	TTRE_0000254301
338	Trichuris_trichiura_3_002	2600001	2620000	0.539479	2600002	2602438	TTRE_0000254801	X-ray repair cross-complementing protein 5	UniProtKB/TrEMBL	A0A077Z3N7
339	Trichuris_trichiura_3_002	2600001	2620000	0.539479	2606807	2611207	TTRE_0000254901	F5 F8 type C domain containing protein	UniProtKB/TrEMBL	A0A077Z366
340	Trichuris_trichiura_3_002	2600001	2620000	0.539479	2612428	2612871	TTRE_0000255001	Transmembrane protein 60	UniProtKB/TrEMBL	A0A077Z6I5
341	Trichuris_trichiura_3_002	2600001	2620000	0.539479	2613245	2620000	TTRE_0000255101	Insulin receptor substrate 1	UniProtKB/TrEMBL	A0A077Z2M1
342	Trichuris_trichiura_3_002	2640001	2660000	0.558928	2640002	2640317	TTRE_0000255201	Multidrug Resistance protein family member	UniProtKB/TrEMBL	A0A077Z1D9
343	Trichuris_trichiura_3_002	2640001	2660000	0.558928	2646998	2649544	TTRE_0000255301	Patched family protein	UniProtKB/TrEMBL	A0A077Z3P1
344	Trichuris_trichiura_3_002	2640001	2660000	0.558928	2657238	2657725	TTRE_0000694701
345	Trichuris_trichiura_3_002	2860001	2880000	0.588124	2873152	2874237	TTRE_0000122101
346	Trichuris_trichiura_3_002	2880001	2900000	0.74445	2887821	2888836	TTRE_0000122001	Lipocalin domain containing protein	UniProtKB/TrEMBL	A0A077YZR9
347	Trichuris_trichiura_3_002	2900001	2920000	0.737095	2900067	2910249	TTRE_0000121901	Solute carrier family 12	UniProtKB/TrEMBL	A0A077YXW4
348	Trichuris_trichiura_3_002	2900001	2920000	0.737095	2910453	2913788	TTRE_0000121801	PAS 11 domain containing protein	UniProtKB/TrEMBL	A0A077YYQ0
349	Trichuris_trichiura_3_002	2960001	2980000	0.545426	2965908	2970753	TTRE_0000225801	Pkinase domain containing protein	UniProtKB/TrEMBL	A0A077Z261
350	Trichuris_trichiura_3_002	2960001	2980000	0.545426	2972998	2973240	TTRE_0000225701
351	Trichuris_trichiura_3_002	2960001	2980000	0.545426	2977571	2980000	TTRE_0000141401	Retrovirus-related Pol polyprotein from transposo n TNT 1-94	UniProtKB/TrEMBL	A0A077YZE4
352	Trichuris_trichiura_3_002	3520001	3540000	0.538151	3520002	3524752	TTRE_0000698501	Bromodomain domain containing protein	UniProtKB/TrEMBL	A0A077ZE85
353	Trichuris_trichiura_3_002	3520001	3540000	0.538151	3530889	3533071	TTRE_0000698601	GTP binding protein 2	UniProtKB/TrEMBL	A0A077ZE73
354	Trichuris_trichiura_3_002	3520001	3540000	0.538151	3534253	3535314	TTRE_0000698701	Putative tRNA (cytidine(32)/guanosine(34)-2'-O)-methyltransferase	UniProtKB/TrEMBL	A0A077ZGE2
355	Trichuris_trichiura_3_002	3800001	3820000	0.533037	3806736	3807726	TTRE_0000643801
356	Trichuris_trichiura_3_002	3800001	3820000	0.533037	3813952	3815355	TTRE_0000643701	UAA domain containing protein	UniProtKB/TrEMBL	A0A077ZE98
357	Trichuris_trichiura_3_002	3800001	3820000	0.533037	3815546	3816692	TTRE_0000643601	Epimerase family protein SDR39U1	UniProtKB/TrEMBL	A0A077ZF59
358	Trichuris_trichiura_3_002	3820001	3840000	0.605281	3820002	3820925	TTRE_0000643501	ECIST Cterm and ECSIT domain containing protein	UniProtKB/TrEMBL	A0A077ZCQ6
359	Trichuris_trichiura_3_002	3800001	3820000	0.533037	3819362	3820000	TTRE_0000643501	ECIST Cterm and ECSIT domain containing protein	UniProtKB/TrEMBL	A0A077ZCQ6
360	Trichuris_trichiura_3_002	3820001	3840000	0.605281	3821021	3822346	TTRE_0000643401
361	Trichuris_trichiura_3_002	3820001	3840000	0.605281	3827802	3830490	TTRE_0000643301	Hydrolase	UniProtKB/TrEMBL	A0A077ZHR2
362	Trichuris_trichiura_3_002	3820001	3840000	0.605281	3833383	3839511	TTRE_0000643201	Vitellogenin N and VWD and DUF1943 domain contain ing protein	UniProtKB/TrEMBL	A0A077ZE83
363	Trichuris_trichiura_3_002	3840001	3860000	0.567492	3846181	3847130	TTRE_0000643101	MIF4G domain containing protein	UniProtKB/TrEMBL	A0A077ZF46
364	Trichuris_trichiura_3_002	3840001	3860000	0.567492	3847506	3851107	TTRE_0000643001	Unc 112 related protein	UniProtKB/TrEMBL	A0A077ZCP2
365	Trichuris_trichiura_3_002	3840001	3860000	0.567492	3851382	3851708	TTRE_0000642901	SLA LP auto ag domain containing protein	UniProtKB/TrEMBL	A0A077ZCL6
366	Trichuris_trichiura_3_002	3840001	3860000	0.567492	3855857	3860000	TTRE_0000872601	O-phosphoseryl-tRNA(Sec) selenium transferase	UniProtKB/TrEMBL	A0A077ZIW7
367	Trichuris_trichiura_3_002	4660001	4680000	0.632817	4671124	4680000	TTRE_0000626301	Protein kcc	UniProtKB/TrEMBL	A0A077ZC29
368	Trichuris_trichiura_3_002	4720001	4740000	0.546056	4720002	4722711	TTRE_0000863801
369	Trichuris_trichiura_3_002	4720001	4740000	0.546056	4723432	4726941	TTRE_0000863901
370	Trichuris_trichiura_3_002	4720001	4740000	0.546056	4732751	4734883	TTRE_0000799201	LIM domain containing protein	UniProtKB/TrEMBL	A0A077ZIU8
371	Trichuris_trichiura_3_002	4960001	4980000	0.619759	4960002	4963705	TTRE_0000623401	Ras specific guanine nucleotide releasing factor	UniProtKB/TrEMBL	A0A077ZDM1
372	Trichuris_trichiura_3_002	4960001	4980000	0.619759	4964034	4965224	TTRE_0000623301
373	Trichuris_trichiura_3_002	4960001	4980000	0.619759	4966572	4968507	TTRE_0000623201	Helicase SKI2W	UniProtKB/TrEMBL	A0A077ZC05
374	Trichuris_trichiura_3_002	4960001	4980000	0.619759	4967244	4968752	TTRE_0000623101
375	Trichuris_trichiura_3_002	4960001	4980000	0.619759	4973952	4980000	TTRE_0000622901	Helicase C and DEAD and DSHCT domain containing p rotein	UniProtKB/TrEMBL	A0A077ZDL4
376	Trichuris_trichiura_3_002	4980001	5000000	0.591109	4980002	4984746	TTRE_0000622901	Helicase C and DEAD and DSHCT domain containing p rotein	UniProtKB/TrEMBL	A0A077ZDL4
377	Trichuris_trichiura_3_002	4960001	4980000	0.619759	4979976	4980000	TTRE_0000623001
378	Trichuris_trichiura_3_002	4980001	5000000	0.591109	4980002	4980287	TTRE_0000623001
379	Trichuris_trichiura_3_002	4980001	5000000	0.591109	4988554	4989881	TTRE_0000622801	ADK domain containing protein	UniProtKB/TrEMBL	A0A077ZEG3
380	Trichuris_trichiura_3_002	4980001	5000000	0.591109	4990216	4991446	TTRE_0000622701	Adenylate kinase isoenzyme 1	UniProtKB/TrEMBL	A0A077ZC00
381	Trichuris_trichiura_3_002	4980001	5000000	0.591109	4991901	4993441	TTRE_0000622601	Endophilin protein 1, b	UniProtKB/TrEMBL	A0A077ZC07
382	Trichuris_trichiura_3_002	4980001	5000000	0.591109	4993589	4994545	TTRE_0000622501	Hep 59 domain containing protein	UniProtKB/TrEMBL	A0A077ZH18
383	Trichuris_trichiura_3_002	4980001	5000000	0.591109	4995022	4995719	TTRE_0000622401	40S ribosomal protein S18	UniProtKB/TrEMBL	A0A077ZDK7
384	Trichuris_trichiura_3_003	1060001	1080000	0.601054	1063523	1066289	TTRE_0000292601	Alpha-galactosidase	UniProtKB/TrEMBL	A0A077Z3S2
385	Trichuris_trichiura_3_003	1060001	1080000	0.601054	1066664	1067143	TTRE_0000292501	Dual specificity protein phosphatase 22	UniProtKB/TrEMBL	A0A077Z7L5
386	Trichuris_trichiura_3_003	1060001	1080000	0.601054	1068307	1069781	TTRE_0000292401	PAN 1 domain containing protein	UniProtKB/TrEMBL	A0A077Z4C4
387	Trichuris_trichiura_3_003	1060001	1080000	0.601054	1072599	1074041	TTRE_0000292301	FLYWCH and MULE domain containing protein	UniProtKB/TrEMBL	A0A077Z4V8
388	Trichuris_trichiura_3_003	1100001	1120000	0.578326	1116953	1117435	TTRE_0000419801	Receptor expression-enhancing protein	UniProtKB/TrEMBL	A0A077Z831
389	Trichuris_trichiura_3_003	1100001	1120000	0.578326	1118661	1120000	TTRE_0000419701
390	Trichuris_trichiura_3_003	1580001	1600000	0.661491	1595299	1595498	TTRE_0000707701	DUF5641 domain-containing protein	UniProtKB/TrEMBL	A0A077ZEF3
391	Trichuris_trichiura_3_003	1840001	1860000	0.627364	1840064	1842368	TTRE_0000896401	DUF229 domain containing protein	UniProtKB/TrEMBL	A0A077ZJJ8
392	Trichuris_trichiura_3_003	1840001	1860000	0.627364	1855358	1856765	TTRE_0000484901
393	Trichuris_trichiura_3_004	580001	600000	0.580445	592799	600000	TTRE_0000419901	ABC protein, subfamily ABCD	UniProtKB/TrEMBL	A0A077ZB97
