# Supplementary material for: Population genomics of ancient and modern Trichuris trichiura
Source: Nat Commun. 2022 Jul 6;13:3888. doi: 10.1038/s41467-022-31487-x (PMC9259628; doi:10.1038/s41467-022-31487-x)
Supplement: Supplementary file 9 — Supplementary Data 6 [file 41467_2022_31487_MOESM9_ESM.xlsx]

## Sheet: Sheet1
COUNT	CHROMSOME	BIN_START	BIN_END	WEIGHTED_FST	GENE_START	GENE_END	GENE_ID	INTERPROSCAN_DESCRIPTION	INTERPROSCAN_SOURCE	INTERPROSCAN_SOURCE_ACCESSION
1	Trichuris_trichiura_00_001	60001	80000	0.82521	77382	79549	TTRE_0000646301	Asp protease 2 domain containing protein	UniProtKB/TrEMBL	A0A077ZF81
2	Trichuris_trichiura_00_001	140001	160000	0.892945	148052	148553	TTRE_0000918001
3	Trichuris_trichiura_00_001	580001	600000	0.898516	586516	589714	TTRE_0000644201	DUF1758 and DUF1759 and RVT 1 and Peptidase A17 d omain containing protein	UniProtKB/TrEMBL	A0A077ZEA3
4	Trichuris_trichiura_00_001	1160001	1180000	0.857934	1160002	1160883	TTRE_0000970301	Zinc knuckle protein	UniProtKB/TrEMBL	A0A077ZLM7
5	Trichuris_trichiura_00_001	1200001	1220000	0.86236	1217815	1218748	TTRE_0000915801
6	Trichuris_trichiura_00_001	1280001	1300000	0.845561	1288492	1289044	TTRE_0000969101
7	Trichuris_trichiura_00_001	1340001	1360000	0.821866	1351222	1351449	TTRE_0000944301	Putative dna repair protein rad32 protein	UniProtKB/TrEMBL	A0A077ZMP9
8	Trichuris_trichiura_00_001	1740001	1760000	0.913929	1755122	1756226	TTRE_0000970801
9	Trichuris_trichiura_00_002	340001	360000	0.90658	343793	343983	TTRE_0000787501
10	Trichuris_trichiura_00_002	340001	360000	0.90658	353335	353643	TTRE_0000882901
11	Trichuris_trichiura_00_002	340001	360000	0.90658	354302	355285	TTRE_0000879401
12	Trichuris_trichiura_00_002	340001	360000	0.90658	359105	359910	TTRE_0000946301
13	Trichuris_trichiura_00_002	380001	400000	0.886713	388304	388704	TTRE_0000951701	ERG2 and Sigma1 receptor like protein	UniProtKB/TrEMBL	A0A077ZL84
14	Trichuris_trichiura_00_002	400001	420000	0.816544	403435	404676	TTRE_0000904801
15	Trichuris_trichiura_00_002	400001	420000	0.816544	414813	415433	TTRE_0000707901
16	Trichuris_trichiura_00_002	480001	500000	0.87865	486883	487248	TTRE_0000952201	Pao retrotransposon peptidase superfamily	UniProtKB/TrEMBL	A0A077ZQP7
17	Trichuris_trichiura_00_002	480001	500000	0.87865	487339	487707	TTRE_0000952101	Zinc knuckle protein	UniProtKB/TrEMBL	A0A077ZMX1
18	Trichuris_trichiura_00_002	540001	560000	0.825829	542637	543102	TTRE_0000845701
19	Trichuris_trichiura_00_002	540001	560000	0.825829	543118	543614	TTRE_0000960101
20	Trichuris_trichiura_00_002	540001	560000	0.825829	543640	543970	TTRE_0000845501
21	Trichuris_trichiura_00_002	540001	560000	0.825829	544055	544608	TTRE_0000801801	NADH-ubiquinone oxidoreductase chain 4	UniProtKB/TrEMBL	A0A077ZM38
22	Trichuris_trichiura_00_025	80001	100000	0.943428	80002	80953	TTRE_0000474301	MBOAT domain containing protein	UniProtKB/TrEMBL	A0A077Z9X1
23	Trichuris_trichiura_1_001	200001	220000	0.708025	202335	203062	TTRE_0000065301
24	Trichuris_trichiura_1_001	200001	220000	0.708025	218214	218753	TTRE_0000065201	Abundant larval transcript 2 (Alt2) protein	UniProtKB/TrEMBL	A0A077YY61
25	Trichuris_trichiura_1_001	500001	520000	0.803181	506168	513117	TTRE_0000249601	Zinc finger homeobox protein 3	UniProtKB/TrEMBL	A0A077Z2H2
26	Trichuris_trichiura_1_001	500001	520000	0.803181	506434	506679	TTRE_0000249501
27	Trichuris_trichiura_1_001	520001	540000	0.814309	530803	531505	TTRE_0000249701
28	Trichuris_trichiura_1_001	520001	540000	0.814309	533450	535710	TTRE_0000249801	C2H2-type domain-containing protein	UniProtKB/TrEMBL	A0A077Z3J9
29	Trichuris_trichiura_1_001	560001	580000	0.803147	578551	580000	TTRE_0000249901	Zinc finger protein	UniProtKB/TrEMBL	A0A077Z322
30	Trichuris_trichiura_1_001	620001	640000	0.798389	620002	620503	TTRE_0000971101
31	Trichuris_trichiura_1_001	620001	640000	0.798389	625168	626414	TTRE_0000250301
32	Trichuris_trichiura_1_001	620001	640000	0.798389	626497	627414	TTRE_0000663201
33	Trichuris_trichiura_1_001	620001	640000	0.798389	628355	640000	TTRE_0000663101	Chloride channel protein	UniProtKB/TrEMBL	A0A077ZER2
34	Trichuris_trichiura_1_001	2580001	2600000	0.685525	2580470	2581310	TTRE_0000376501	Ribosomal protein	UniProtKB/TrEMBL	A0A077Z772
35	Trichuris_trichiura_1_001	2580001	2600000	0.685525	2582973	2583344	TTRE_0000376601	Histone H2B	UniProtKB/TrEMBL	A0A077Z6P1
36	Trichuris_trichiura_1_001	2580001	2600000	0.685525	2588950	2589685	TTRE_0000376701	NADH dehydrogenase (Ubiquinone) iron sulfur	UniProtKB/TrEMBL	A0A077Z9W4
37	Trichuris_trichiura_1_001	2580001	2600000	0.685525	2592109	2595237	TTRE_0000376801	28S ribosomal protein S21	UniProtKB/TrEMBL	A0A077Z5R9
38	Trichuris_trichiura_1_001	2580001	2600000	0.685525	2596125	2598321	TTRE_0000376901	Prenyltrans 2 domain containing protein	UniProtKB/TrEMBL	A0A077Z4S7
39	Trichuris_trichiura_1_001	3620001	3640000	0.681732	3623140	3623541	TTRE_0000327501	Histone H2A	UniProtKB/TrEMBL	A0A077ZIY1
40	Trichuris_trichiura_1_001	3620001	3640000	0.681732	3629955	3630664	TTRE_0000327401	TAP42 domain containing protein	UniProtKB/TrEMBL	A0A077Z5R0
41	Trichuris_trichiura_1_001	3620001	3640000	0.681732	3635646	3636196	TTRE_0000327301
42	Trichuris_trichiura_1_001	3620001	3640000	0.681732	3638251	3640000	TTRE_0000327201	NCD2 and NCD1 domain containing protein	UniProtKB/TrEMBL	A0A077Z4I6
43	Trichuris_trichiura_1_004	260001	280000	0.739776	277328	278046	TTRE_0000951801
44	Trichuris_trichiura_1_004	280001	300000	0.70486	294586	295735	TTRE_0000967601	C2H2-type domain-containing protein	UniProtKB/TrEMBL	A0A077ZLN8
45	Trichuris_trichiura_1_004	300001	320000	0.692147	318990	319466	TTRE_0000874201
46	Trichuris_trichiura_1_004	320001	340000	0.842369	323592	324968	TTRE_0000978901	Piwi domain containing protein	UniProtKB/TrEMBL	A0A077ZNP4
47	Trichuris_trichiura_1_004	320001	340000	0.842369	326416	326799	TTRE_0000967401	Bax1-I domain containing protein	UniProtKB/TrEMBL	A0A077ZLL1
48	Trichuris_trichiura_1_004	320001	340000	0.842369	337129	337845	TTRE_0000978801	Major sperm protein	UniProtKB/TrEMBL	A0A077ZNE2
49	Trichuris_trichiura_1_004	340001	360000	0.779454	346219	346935	TTRE_0000971001	Major sperm protein	UniProtKB/TrEMBL	A0A077ZLQ8
50	Trichuris_trichiura_1_004	360001	380000	0.779073	371208	371897	TTRE_0000603601	Gag pol protein	UniProtKB/TrEMBL	A0A077ZBJ7
51	Trichuris_trichiura_1_004	420001	440000	0.776316	420778	421037	TTRE_0000903401	DRBM domain-containing protein	UniProtKB/TrEMBL	A0A077ZLT8
52	Trichuris_trichiura_1_004	420001	440000	0.776316	422628	422971	TTRE_0000903301	Small heat shock protein	UniProtKB/TrEMBL	A0A077ZLQ0
53	Trichuris_trichiura_1_004	420001	440000	0.776316	425681	426098	TTRE_0000903201
54	Trichuris_trichiura_1_004	440001	460000	0.751327	441976	442283	TTRE_0000865701
55	Trichuris_trichiura_1_004	440001	460000	0.751327	450181	451596	TTRE_0000950501	Major sperm protein	UniProtKB/TrEMBL	A0A077ZL75
56	Trichuris_trichiura_1_004	480001	500000	0.767654	481775	482150	TTRE_0000970201
57	Trichuris_trichiura_1_004	480001	500000	0.767654	483560	484087	TTRE_0000971701	Integrase catalytic domain-containing protein	UniProtKB/TrEMBL	A0A077ZNI5
58	Trichuris_trichiura_1_004	480001	500000	0.767654	496096	496452	TTRE_0000837401
59	Trichuris_trichiura_1_004	480001	500000	0.767654	497714	498172	TTRE_0000890101	Integrase_H2C2 domain-containing protein	UniProtKB/TrEMBL	A0A077ZP74
60	Trichuris_trichiura_1_004	1200001	1220000	0.695	1200798	1208781	TTRE_0000848901
61	Trichuris_trichiura_1_004	1200001	1220000	0.695	1212567	1213620	TTRE_0000506601	Oxidoreductase, short chain	UniProtKB/TrEMBL	A0A077ZAF4
62	Trichuris_trichiura_1_004	1200001	1220000	0.695	1214822	1216214	TTRE_0000506501	Translocation protein sec62	UniProtKB/TrEMBL	A0A077ZB25
63	Trichuris_trichiura_1_004	1220001	1240000	0.70887	1221381	1225179	TTRE_0000506401	AMP-binding domain containing protein	UniProtKB/TrEMBL	A0A077Z8K0
64	Trichuris_trichiura_1_004	1220001	1240000	0.70887	1234717	1238243	TTRE_0000506301	Denticleless protein homolog	UniProtKB/TrEMBL	A0A077Z990
65	Trichuris_trichiura_1_004	1220001	1240000	0.70887	1239389	1240000	TTRE_0000506201	Transporter, major facilitator family	UniProtKB/TrEMBL	A0A077ZDP2
66	Trichuris_trichiura_1_004	1240001	1260000	0.706825	1240002	1240894	TTRE_0000506201	Transporter, major facilitator family	UniProtKB/TrEMBL	A0A077ZDP2
67	Trichuris_trichiura_1_004	1240001	1260000	0.706825	1252846	1254359	TTRE_0000506101	Ubiquinol cytochrome c reductase, cytochrome c1	UniProtKB/TrEMBL	A0A077ZAF0
68	Trichuris_trichiura_1_004	1260001	1280000	0.746131	1263048	1265794	TTRE_0000506001	Dynein light intermediate chain	UniProtKB/TrEMBL	A0A077ZB19
69	Trichuris_trichiura_1_004	1260001	1280000	0.746131	1272863	1273765	TTRE_0000505901	Leucine Rich Repeat family protein	UniProtKB/TrEMBL	A0A077Z8J6
70	Trichuris_trichiura_1_004	1280001	1300000	0.761374	1281021	1281586	TTRE_0000575801	Carm_PH domain-containing protein	UniProtKB/TrEMBL	A0A077ZAY3
71	Trichuris_trichiura_1_004	1280001	1300000	0.761374	1298247	1298912	TTRE_0000575701	G_PROTEIN_RECEP_F1_2 domain-containing protein	UniProtKB/TrEMBL	A0A077ZFL8
72	Trichuris_trichiura_1_004	1300001	1320000	0.702635	1307603	1308199	TTRE_0000575601	DUF2036 domain containing protein	UniProtKB/TrEMBL	A0A077ZC85
73	Trichuris_trichiura_1_004	1300001	1320000	0.702635	1310793	1316962	TTRE_0000575501	Protein CUTL 11	UniProtKB/TrEMBL	A0A077ZD32
74	Trichuris_trichiura_1_004	1320001	1340000	0.752755	1322632	1323841	TTRE_0000575401	EF-hand 4 and MCLC and MMR HSR1 domain containing protein	UniProtKB/TrEMBL	A0A077ZAQ6
75	Trichuris_trichiura_1_004	1340001	1360000	0.84778	1347321	1348003	TTRE_0000580201	Emp24:gp25L:p24 family protein	UniProtKB/TrEMBL	A0A077ZFR6
76	Trichuris_trichiura_1_004	1340001	1360000	0.84778	1351845	1352275	TTRE_0000580101
77	Trichuris_trichiura_1_004	1340001	1360000	0.84778	1353342	1353821	TTRE_0000580001	Small heat shock protein	UniProtKB/TrEMBL	A0A077ZD68
78	Trichuris_trichiura_1_004	1340001	1360000	0.84778	1356325	1357698	TTRE_0000579901	Proteasome endopeptidase complex	UniProtKB/TrEMBL	A0A077ZAW8
79	Trichuris_trichiura_1_004	1340001	1360000	0.84778	1359081	1360000	TTRE_0000579801	Calreticulin	UniProtKB/TrEMBL	A0A077ZB14
80	Trichuris_trichiura_1_004	1360001	1380000	0.939715	1360002	1360316	TTRE_0000579801	Calreticulin	UniProtKB/TrEMBL	A0A077ZB14
81	Trichuris_trichiura_1_004	1360001	1380000	0.939715	1372470	1380000	TTRE_0000579701	Leucine rich repeat serine:threonine protein	UniProtKB/TrEMBL	A0A077ZFQ7
82	Trichuris_trichiura_1_004	1380001	1400000	0.904925	1380002	1389072	TTRE_0000579701	Leucine rich repeat serine:threonine protein	UniProtKB/TrEMBL	A0A077ZFQ7
83	Trichuris_trichiura_1_004	1380001	1400000	0.904925	1390817	1391435	TTRE_0000876201	Ank 2 domain containing protein	UniProtKB/TrEMBL	A0A077ZNW0
84	Trichuris_trichiura_1_004	1380001	1400000	0.904925	1394726	1397575	TTRE_0000876101	Y phosphatase domain containing protein	UniProtKB/TrEMBL	A0A077ZKX1
85	Trichuris_trichiura_1_005	280001	300000	0.695059	280002	293609	TTRE_0000482401	Dynein heavy chain	UniProtKB/TrEMBL	A0A077Z9T7
86	Trichuris_trichiura_1_005	260001	280000	0.797867	261824	280000	TTRE_0000482401	Dynein heavy chain	UniProtKB/TrEMBL	A0A077Z9T7
87	Trichuris_trichiura_1_005	300001	320000	0.754252	302237	303075	TTRE_0000482501	PHTB1 C domain containing protein	UniProtKB/TrEMBL	A0A077ZD65
88	Trichuris_trichiura_1_005	300001	320000	0.754252	308415	315242	TTRE_0000404301	PHTB1 C and PHTB1 N domain containing protein	UniProtKB/TrEMBL	A0A077ZAS1
89	Trichuris_trichiura_1_006	40001	60000	0.91872	53218	53910	TTRE_0000937501
90	Trichuris_trichiura_1_006	40001	60000	0.91872	56220	56750	TTRE_0000980301	Asp protease 2 domain containing protein	UniProtKB/TrEMBL	A0A077ZLX9
91	Trichuris_trichiura_1_006	60001	80000	0.748055	64083	64647	TTRE_0000602601	Partner of Y14 and mago	UniProtKB/TrEMBL	A0A077ZBI8
92	Trichuris_trichiura_1_006	80001	100000	0.705394	88050	94975	TTRE_0000616301	EST1 DNA bind and PIN 4 domain containing protein	UniProtKB/TrEMBL	A0A077ZBV4
93	Trichuris_trichiura_1_006	140001	160000	0.686162	140002	150879	TTRE_0000602701	WD40 and TLE N domain containing protein	UniProtKB/TrEMBL	A0A077ZBH1
94	Trichuris_trichiura_1_006	260001	280000	0.699136	261425	262215	TTRE_0000714201
95	Trichuris_trichiura_1_006	260001	280000	0.699136	276435	278006	TTRE_0000714301	EB module family protein	UniProtKB/TrEMBL	A0A077ZGP8
96	Trichuris_trichiura_1_006	280001	300000	0.729641	293131	298996	TTRE_0000639001	Solute carrier family 25 2	UniProtKB/TrEMBL	A0A077ZEY2
97	Trichuris_trichiura_1_006	320001	340000	0.752653	320002	323783	TTRE_0000638501	ATP dependent Clp protease ATP binding subunit	UniProtKB/TrEMBL	A0A077ZE19
98	Trichuris_trichiura_1_006	320001	340000	0.752653	330193	331647	TTRE_0000617501	GTP EFTU D2 and GTP EFTU D3 and GTP EFTU domain c ontaining protein	UniProtKB/TrEMBL	A0A077ZEB1
99	Trichuris_trichiura_1_006	320001	340000	0.752653	337028	340000	TTRE_0000617401	Transcription factor IIIB 90 kDa subunit	UniProtKB/TrEMBL	A0A077ZBU4
100	Trichuris_trichiura_1_006	340001	360000	0.736386	340002	340462	TTRE_0000617401	Transcription factor IIIB 90 kDa subunit	UniProtKB/TrEMBL	A0A077ZBU4
101	Trichuris_trichiura_1_006	340001	360000	0.736386	347565	349530	TTRE_0000617301	Tubulin alpha chain	UniProtKB/TrEMBL	A0A077ZBW6
102	Trichuris_trichiura_1_006	340001	360000	0.736386	357606	359094	TTRE_0000617201	SWI:SNF matrix associated	UniProtKB/TrEMBL	A0A077ZGX7
103	Trichuris_trichiura_1_006	360001	380000	0.748268	367362	371124	TTRE_0000617101	CBM 14 and TSP 1 domain containing protein	UniProtKB/TrEMBL	A0A077ZDE6
104	Trichuris_trichiura_1_006	360001	380000	0.748268	371611	372222	TTRE_0000617001
105	Trichuris_trichiura_1_006	420001	440000	0.682432	420002	423699	TTRE_0000363501
106	Trichuris_trichiura_1_006	420001	440000	0.682432	439743	440000	TTRE_0000363601	Troponin C	UniProtKB/TrEMBL	A0A077Z6A8
107	Trichuris_trichiura_1_006	540001	560000	0.705623	559309	560000	TTRE_0000475501	Homeobox KN domain containing protein	UniProtKB/TrEMBL	A0A077ZCZ0
108	Trichuris_trichiura_1_006	560001	580000	0.701092	560002	561103	TTRE_0000475501	Homeobox KN domain containing protein	UniProtKB/TrEMBL	A0A077ZCZ0
109	Trichuris_trichiura_1_006	580001	600000	0.719284	585651	586725	TTRE_0000475601	Cuticle collagen 6 (Protein roller 8)	UniProtKB/TrEMBL	A0A077Z8C7
110	Trichuris_trichiura_1_006	580001	600000	0.719284	586736	587170	TTRE_0000475701
111	Trichuris_trichiura_1_006	580001	600000	0.719284	587322	589536	TTRE_0000475801	Serine/threonine-protein kinase RIO3	UniProtKB/TrEMBL	A0A077Z9Z0
112	Trichuris_trichiura_1_006	600001	620000	0.743238	607167	612389	TTRE_0000813301	Muscle cell intermediate filament protein OV71	UniProtKB/TrEMBL	A0A077ZJF5
113	Trichuris_trichiura_1_007	360001	380000	0.688052	369287	369914	TTRE_0000981001	Glyco hydro 18 domain containing protein	UniProtKB/TrEMBL	A0A077ZLY3
114	Trichuris_trichiura_2_001	780001	800000	0.493734	793640	795940	TTRE_0000054201
115	Trichuris_trichiura_2_001	800001	820000	0.390829	814817	815545	TTRE_0000054301	G_PROTEIN_RECEP_F1_2 domain-containing protein	UniProtKB/TrEMBL	A0A077YX14
116	Trichuris_trichiura_2_001	820001	840000	0.395928	821379	821753	TTRE_0000054401	Ribosomal protein P1	UniProtKB/TrEMBL	A0A077Z107
117	Trichuris_trichiura_2_001	820001	840000	0.395928	831306	832822	TTRE_0000054501	ShK domain containing protein	UniProtKB/TrEMBL	A0A077YWX5
118	Trichuris_trichiura_2_001	820001	840000	0.395928	837036	838614	TTRE_0000281501	ShK domain containing protein	UniProtKB/TrEMBL	A0A077Z795
119	Trichuris_trichiura_2_001	1100001	1120000	0.412533	1100002	1102225	TTRE_0000369501	Actin interacting protein 1	UniProtKB/TrEMBL	A0A077Z717
120	Trichuris_trichiura_2_001	1100001	1120000	0.412533	1101809	1104163	TTRE_0000369601	ER membrane protein complex subunit 4	UniProtKB/TrEMBL	A0A077Z6H6
121	Trichuris_trichiura_2_001	1100001	1120000	0.412533	1104628	1112116	TTRE_0000369701	Clathrin heavy chain	UniProtKB/TrEMBL	A0A077Z9Q9
122	Trichuris_trichiura_2_001	1140001	1160000	0.351174	1141219	1144855	TTRE_0000387501	Lysine specific demethylase 4A	UniProtKB/TrEMBL	A0A077Z550
123	Trichuris_trichiura_2_001	1140001	1160000	0.351174	1145645	1147555	TTRE_0000387601	Fanconi-associated nuclease	UniProtKB/TrEMBL	A0A077Z7H7
124	Trichuris_trichiura_2_001	1140001	1160000	0.351174	1151927	1153975	TTRE_0000387701	Amidophosphoribosyltransferase	UniProtKB/TrEMBL	A0A077Z730
125	Trichuris_trichiura_2_001	1140001	1160000	0.351174	1158021	1159797	TTRE_0000387801	Protein dachsous	UniProtKB/TrEMBL	A0A077ZA60
126	Trichuris_trichiura_2_001	1160001	1180000	0.377403	1163364	1164578	TTRE_0000387901	Protein OSCP1	UniProtKB/TrEMBL	A0A077Z625
127	Trichuris_trichiura_2_001	1160001	1180000	0.377403	1164637	1175128	TTRE_0000388001	Cadherin domain containing protein	UniProtKB/TrEMBL	A0A077Z555
128	Trichuris_trichiura_2_001	1160001	1180000	0.377403	1176913	1177814	TTRE_0000388101	DNA directed RNA polymerase III subunit RPC8	UniProtKB/TrEMBL	A0A077Z7I0
129	Trichuris_trichiura_2_001	1160001	1180000	0.377403	1178056	1178982	TTRE_0000388201	Serine/threonine-protein phosphatase	UniProtKB/TrEMBL	A0A077Z737
130	Trichuris_trichiura_2_001	1160001	1180000	0.377403	1179704	1180000	TTRE_0000388301	60S ribosomal protein L10	UniProtKB/TrEMBL	A0A077ZA65
131	Trichuris_trichiura_2_001	1220001	1240000	0.400839	1223252	1225109	TTRE_0000932901	40 kDa peptidyl prolyl cis trans isomerase	UniProtKB/TrEMBL	A0A077ZQ87
132	Trichuris_trichiura_2_001	1220001	1240000	0.400839	1225687	1227046	TTRE_0000933001	Protein FRA10AC1	UniProtKB/TrEMBL	A0A077ZKP5
133	Trichuris_trichiura_2_001	1220001	1240000	0.400839	1238711	1240000	TTRE_0000460001	Receptor type tyrosine protein phosphatase	UniProtKB/TrEMBL	A0A077Z9J9
134	Trichuris_trichiura_2_001	1240001	1260000	0.488302	1240002	1246680	TTRE_0000460001	Receptor type tyrosine protein phosphatase	UniProtKB/TrEMBL	A0A077Z9J9
135	Trichuris_trichiura_2_001	1240001	1260000	0.488302	1251022	1252260	TTRE_0000459901	Elongation factor 1 beta	UniProtKB/TrEMBL	A0A077Z782
136	Trichuris_trichiura_2_001	1240001	1260000	0.488302	1257678	1258602	TTRE_0000459801
137	Trichuris_trichiura_2_001	2520001	2540000	0.390347	2520002	2520503	TTRE_0000691701	Adh short and adh short C2 domain containing prot ein	UniProtKB/TrEMBL	A0A077ZFI3
138	Trichuris_trichiura_2_001	2520001	2540000	0.390347	2521814	2523152	TTRE_0000691601	Queuosine salvage protein	UniProtKB/TrEMBL	A0A077ZG81
139	Trichuris_trichiura_2_001	2520001	2540000	0.390347	2528840	2529594	TTRE_0000691501
140	Trichuris_trichiura_2_001	2540001	2560000	0.432342	2548757	2549509	TTRE_0000133701
141	Trichuris_trichiura_2_001	4720001	4740000	0.35048	4720002	4740000	TTRE_0000386301	Trypsin domain containing protein	UniProtKB/TrEMBL	A0A077ZA46
142	Trichuris_trichiura_2_001	4740001	4760000	0.360993	4740002	4751173	TTRE_0000386301	Trypsin domain containing protein	UniProtKB/TrEMBL	A0A077ZA46
143	Trichuris_trichiura_2_001	4740001	4760000	0.360993	4755902	4760000	TTRE_0000386401	Nuclear pore complex protein Nup133	UniProtKB/TrEMBL	A0A077Z606
144	Trichuris_trichiura_2_001	7740001	7760000	0.351081	7740781	7760000	TTRE_0000679301	Glyco transf 10 domain containing protein	UniProtKB/TrEMBL	A0A077ZDM8
145	Trichuris_trichiura_2_001	8900001	8920000	0.379375	8904891	8917670	TTRE_0000553701	Solute carrier family 12	UniProtKB/TrEMBL	A0A077ZAG4
146	Trichuris_trichiura_2_001	8900001	8920000	0.379375	8917834	8919186	TTRE_0000553601	60S ribosomal protein L9	UniProtKB/TrEMBL	A0A077ZF43
147	Trichuris_trichiura_2_001	8900001	8920000	0.379375	8919936	8920000	TTRE_0000553501	Pescadillo homolog	UniProtKB/TrEMBL	A0A077ZBN5
148	Trichuris_trichiura_2_001	9320001	9340000	0.366084	9320002	9323502	TTRE_0000488501	ADP-ribose pyrophosphatase, mitochondrial	UniProtKB/TrEMBL	A0A077ZDD6
149	Trichuris_trichiura_2_001	9320001	9340000	0.366084	9330337	9340000	TTRE_0000826901	Zf-C3Hc3H domain containing protein	UniProtKB/TrEMBL	A0A077ZHQ3
150	Trichuris_trichiura_2_001	9340001	9360000	0.45491	9340002	9340594	TTRE_0000826901	Zf-C3Hc3H domain containing protein	UniProtKB/TrEMBL	A0A077ZHQ3
151	Trichuris_trichiura_2_001	9340001	9360000	0.45491	9355557	9359823	TTRE_0000488401	Sodium:nucleoside cotransporter 2	UniProtKB/TrEMBL	A0A077ZA13
152	Trichuris_trichiura_2_001	9360001	9380000	0.388912	9365348	9371309	TTRE_0000488301	DNA damage-binding protein 1	UniProtKB/TrEMBL	A0A077ZAC0
153	Trichuris_trichiura_2_001	9700001	9720000	0.406836	9704945	9706731	TTRE_0000974101	Putative complement factor Bf	UniProtKB/TrEMBL	A0A077ZLU4
154	Trichuris_trichiura_2_001	9700001	9720000	0.406836	9707258	9708281	TTRE_0000904301	Trypsin domain containing protein	UniProtKB/TrEMBL	A0A077ZLQ9
155	Trichuris_trichiura_2_001	9700001	9720000	0.406836	9716784	9718372	TTRE_0000965401	Trypsin domain containing protein	UniProtKB/TrEMBL	A0A077ZN47
156	Trichuris_trichiura_2_001	9700001	9720000	0.406836	9719977	9720000	TTRE_0000857201	Trypsin domain containing protein	UniProtKB/TrEMBL	A0A077ZKK2
157	Trichuris_trichiura_2_001	9740001	9760000	0.377337	9754118	9756526	TTRE_0000857001	Trypsin domain containing protein	UniProtKB/TrEMBL	A0A077ZIJ9
158	Trichuris_trichiura_2_001	9760001	9780000	0.360139	9760748	9761858	TTRE_0000848301	Cytosolic Fe S cluster assembly factor	UniProtKB/TrEMBL	A0A077ZN77
159	Trichuris_trichiura_2_001	9760001	9780000	0.360139	9762316	9763740	TTRE_0000848201	Ubiquitin conjugating enzyme E2 1	UniProtKB/TrEMBL	A0A077ZK61
160	Trichuris_trichiura_2_001	9760001	9780000	0.360139	9767056	9768704	TTRE_0000848101	26S proteasome non ATPase regulatory subunit 14	UniProtKB/TrEMBL	A0A077ZKC9
161	Trichuris_trichiura_2_001	9760001	9780000	0.360139	9779357	9779743	TTRE_0000836401	Histone H2A	UniProtKB/TrEMBL	A0A077ZI23
162	Trichuris_trichiura_2_001	9840001	9860000	0.365928	9840467	9840990	TTRE_0000418101	Histone H3	UniProtKB/TrEMBL	A0A077ZHY3
163	Trichuris_trichiura_2_001	9840001	9860000	0.365928	9845361	9845880	TTRE_0000834901	Histone H3	UniProtKB/TrEMBL	A0A077ZHY3
164	Trichuris_trichiura_2_001	9840001	9860000	0.365928	9857501	9858838	TTRE_0000877001	Venom allergen 5	UniProtKB/TrEMBL	A0A077ZNW5
165	Trichuris_trichiura_2_001	9860001	9880000	0.350203	9870437	9872824	TTRE_0000788301	KH 1 domain containing protein	UniProtKB/TrEMBL	A0A077ZGV0
166	Trichuris_trichiura_2_001	9860001	9880000	0.350203	9877631	9878843	TTRE_0000788401	60S ribosomal protein L7a	UniProtKB/TrEMBL	A0A077ZGS0
167	Trichuris_trichiura_2_001	9880001	9900000	0.382965	9893595	9894738	TTRE_0000889601	Ras protein Rab 30	UniProtKB/TrEMBL	A0A077ZJB6
168	Trichuris_trichiura_2_001	9900001	9920000	0.371652	9911711	9912260	TTRE_0000958101
169	Trichuris_trichiura_2_001	10080001	10100000	0.375128	10086436	10088535	TTRE_0000453601	WAP domain containing protein, SLPI-like	UniProtKB/TrEMBL	A0A077Z7S7
170	Trichuris_trichiura_2_001	10080001	10100000	0.375128	10094520	10095050	TTRE_0000905401	WAP domain containing protein, SLPI-like	UniProtKB/TrEMBL	A0A077ZLR3
171	Trichuris_trichiura_2_001	10960001	10980000	0.48464	10962657	10968437	TTRE_0000464101
172	Trichuris_trichiura_2_001	10960001	10980000	0.48464	10975424	10977620	TTRE_0000464001	GTP binding ADP ribosylation factor	UniProtKB/TrEMBL	A0A077Z9M6
173	Trichuris_trichiura_2_001	10980001	11000000	0.439625	10986926	10993711	TTRE_0000463901	DM13 domain containing protein	UniProtKB/TrEMBL	A0A077Z7A6
174	Trichuris_trichiura_2_001	11000001	11020000	0.383199	11000392	11001525	TTRE_0000463801	Homeobox domain containing protein	UniProtKB/TrEMBL	A0A077Z816
175	Trichuris_trichiura_2_001	11000001	11020000	0.383199	11005785	11006350	TTRE_0000893001	60S ribosomal protein L27	UniProtKB/TrEMBL	A0A077ZLC9
176	Trichuris_trichiura_2_001	11000001	11020000	0.383199	11014676	11018314	TTRE_0000660701
177	Trichuris_trichiura_2_001	11020001	11040000	0.412104	11026671	11028152	TTRE_0000660601	Gamma-tubulin complex component GCP4	UniProtKB/TrEMBL	A0A077ZEN9
178	Trichuris_trichiura_2_001	11020001	11040000	0.412104	11031871	11032674	TTRE_0000660501
179	Trichuris_trichiura_2_001	11040001	11060000	0.462043	11052149	11056487	TTRE_0000908201	Sodium/nucleoside cotransporter	UniProtKB/TrEMBL	A0A077ZK41
180	Trichuris_trichiura_2_001	11240001	11260000	0.374238	11240002	11241919	TTRE_0000734101	Tho2 and Thoc2 domain containing protein	UniProtKB/TrEMBL	A0A077ZF34
181	Trichuris_trichiura_2_001	11280001	11300000	0.411736	11280002	11280188	TTRE_0000712801	Kringle domain containing protein	UniProtKB/TrEMBL	A0A077ZGN3
182	Trichuris_trichiura_2_001	11280001	11300000	0.411736	11290496	11297806	TTRE_0000712701	Pigment dispersing factor receptor c	UniProtKB/TrEMBL	A0A077ZEJ8
183	Trichuris_trichiura_2_001	11300001	11320000	0.349081	11307044	11307244	TTRE_0000868401
184	Trichuris_trichiura_2_001	11500001	11520000	0.362663	11514624	11515120	TTRE_0000905601
185	Trichuris_trichiura_2_001	11500001	11520000	0.362663	11515554	11515982	TTRE_0000905501
186	Trichuris_trichiura_2_001	11500001	11520000	0.362663	11518612	11519207	TTRE_0000973301
187	Trichuris_trichiura_2_001	11520001	11540000	0.376022	11523107	11523811	TTRE_0000921101
188	Trichuris_trichiura_2_001	11520001	11540000	0.376022	11539354	11540000	TTRE_0000630801
189	Trichuris_trichiura_2_001	11560001	11580000	0.37492	11560002	11561386	TTRE_0000631001	PID domain containing protein	UniProtKB/TrEMBL	A0A077ZDT3
190	Trichuris_trichiura_2_001	11560001	11580000	0.37492	11575005	11575323	TTRE_0000775001
191	Trichuris_trichiura_2_001	11560001	11580000	0.37492	11576748	11576795	TTRE_0000774901
192	Trichuris_trichiura_2_001	11560001	11580000	0.37492	11579492	11579770	TTRE_0000774801	Amyloid beta A4 protein-binding family B member 2	UniProtKB/TrEMBL	A0A077ZHW9
193	Trichuris_trichiura_2_001	11640001	11660000	0.413568	11640945	11642028	TTRE_0000915701
194	Trichuris_trichiura_2_001	11640001	11660000	0.413568	11642664	11644360	TTRE_0000832701
195	Trichuris_trichiura_2_001	11680001	11700000	0.507738	11680002	11686461	TTRE_0000644501	Cubitus interruptus	UniProtKB/TrEMBL	A0A077ZCP0
196	Trichuris_trichiura_2_001	11660001	11680000	0.442436	11678492	11680000	TTRE_0000644501	Cubitus interruptus	UniProtKB/TrEMBL	A0A077ZCP0
197	Trichuris_trichiura_2_001	11720001	11740000	0.476354	11721057	11726941	TTRE_0000778901	Methyltransferase NSUN6	UniProtKB/TrEMBL	A0A077ZLD4
198	Trichuris_trichiura_2_001	11720001	11740000	0.476354	11728371	11730401	TTRE_0000778801	Tubulin alpha chain	UniProtKB/TrEMBL	A0A077ZI14
199	Trichuris_trichiura_2_001	11720001	11740000	0.476354	11735557	11736968	TTRE_0000778701
200	Trichuris_trichiura_2_001	11760001	11780000	0.476811	11765455	11765788	TTRE_0000648501
201	Trichuris_trichiura_2_001	11760001	11780000	0.476811	11765813	11767252	TTRE_0000648601
202	Trichuris_trichiura_2_001	11800001	11820000	0.446305	11816261	11817636	TTRE_0000715501	KRR1 small subunit processome component	UniProtKB/TrEMBL	A0A077ZJR7
203	Trichuris_trichiura_2_001	11860001	11880000	0.497682	11870658	11871650	TTRE_0000788101	KH 1 domain containing protein	UniProtKB/TrEMBL	A0A077ZIB7
204	Trichuris_trichiura_2_001	11880001	11900000	0.586781	11893740	11894834	TTRE_0000684401	Eukaryotic translation initiation	UniProtKB/TrEMBL	A0A077ZDS2
205	Trichuris_trichiura_2_001	11880001	11900000	0.586781	11899990	11900000	TTRE_0000684501	UNC93 protein MFSD11	UniProtKB/TrEMBL	A0A077ZDT2
206	Trichuris_trichiura_2_001	11900001	11920000	0.546355	11900002	11912479	TTRE_0000684501	UNC93 protein MFSD11	UniProtKB/TrEMBL	A0A077ZDT2
207	Trichuris_trichiura_2_001	11900001	11920000	0.546355	11915300	11918146	TTRE_0000684601	DC STAMP domain containing protein	UniProtKB/TrEMBL	A0A077ZG16
208	Trichuris_trichiura_2_001	11940001	11960000	0.54655	11950867	11952269	TTRE_0000676601	Nucleosome-remodeling factor subunit BPTF	UniProtKB/TrEMBL	A0A077ZIL7
209	Trichuris_trichiura_2_001	11940001	11960000	0.54655	11958946	11960000	TTRE_0000676501	Nucleosome-remodeling factor subunit NURF301-like protein	UniProtKB/TrEMBL	A0A077ZF30
210	Trichuris_trichiura_2_001	11960001	11980000	0.564017	11960002	11960685	TTRE_0000676501	Nucleosome-remodeling factor subunit NURF301-like protein	UniProtKB/TrEMBL	A0A077ZF30
211	Trichuris_trichiura_2_001	11960001	11980000	0.564017	11965278	11969545	TTRE_0000676401	PHD domain-containing protein	UniProtKB/TrEMBL	A0A077ZFV2
212	Trichuris_trichiura_2_001	11960001	11980000	0.564017	11975476	11976733	TTRE_0000676301	DDT domain containing protein	UniProtKB/TrEMBL	A0A077ZDL6
213	Trichuris_trichiura_2_001	11960001	11980000	0.564017	11978936	11979693	TTRE_0000676201	Zf-CCHC domain containing protein	UniProtKB/TrEMBL	A0A077ZDI9
214	Trichuris_trichiura_2_001	11980001	12000000	0.418078	11987244	11988201	TTRE_0000700401
215	Trichuris_trichiura_2_001	11980001	12000000	0.418078	11993161	11994794	TTRE_0000700301
216	Trichuris_trichiura_2_001	12000001	12020000	0.439058	12010185	12010491	TTRE_0000700201	Mediator of rna polymerase ii transcription subun it	UniProtKB/TrEMBL	A0A077ZE84
217	Trichuris_trichiura_2_001	12000001	12020000	0.439058	12019396	12020000	TTRE_0000466601	Serine/threonine-protein phosphatase	UniProtKB/TrEMBL	A0A077Z9P7
218	Trichuris_trichiura_2_001	12020001	12040000	0.412582	12020002	12020277	TTRE_0000466601	Serine/threonine-protein phosphatase	UniProtKB/TrEMBL	A0A077Z9P7
219	Trichuris_trichiura_2_001	12020001	12040000	0.412582	12027821	12029480	TTRE_0000466701	BZIP 2 and Sas10 Utp3 domain containing protein	UniProtKB/TrEMBL	A0A077Z9D5
220	Trichuris_trichiura_2_001	12020001	12040000	0.412582	12032947	12033549	TTRE_0000967901	DUF1758 domain containing protein	UniProtKB/TrEMBL	A0A077ZQY3
221	Trichuris_trichiura_2_001	12020001	12040000	0.412582	12034954	12036436	TTRE_0000870501
222	Trichuris_trichiura_2_001	12020001	12040000	0.412582	12036525	12036822	TTRE_0000601601	DUF5641 domain-containing protein	UniProtKB/TrEMBL	A0A077ZBG4
223	Trichuris_trichiura_2_001	12020001	12040000	0.412582	12038142	12040000	TTRE_0000466801	Pkinase domain containing protein	UniProtKB/TrEMBL	A0A077ZCP9
224	Trichuris_trichiura_2_001	12040001	12060000	0.555723	12040002	12042454	TTRE_0000466801	Pkinase domain containing protein	UniProtKB/TrEMBL	A0A077ZCP9
225	Trichuris_trichiura_2_001	12060001	12080000	0.577839	12060002	12060811	TTRE_0000466901	Patched family protein	UniProtKB/TrEMBL	A0A077Z844
226	Trichuris_trichiura_2_001	12040001	12060000	0.555723	12056391	12060000	TTRE_0000466901	Patched family protein	UniProtKB/TrEMBL	A0A077Z844
227	Trichuris_trichiura_2_001	12060001	12080000	0.577839	12071941	12072438	TTRE_0000467001	Patched domain containing protein	UniProtKB/TrEMBL	A0A077Z7D3
228	Trichuris_trichiura_2_001	12060001	12080000	0.577839	12079509	12079877	TTRE_0000467101	Major sperm protein	UniProtKB/TrEMBL	A0A077Z9P9
229	Trichuris_trichiura_2_001	12080001	12100000	0.354106	12080590	12085476	TTRE_0000467201	Transcription initiation factor IIB	UniProtKB/TrEMBL	A0A077Z9E2
230	Trichuris_trichiura_2_001	12080001	12100000	0.354106	12086355	12089129	TTRE_0000467301	Apoptosis inducing factor 1, mitochondrial	UniProtKB/TrEMBL	A0A077ZCQ3
231	Trichuris_trichiura_2_001	12100001	12120000	0.349919	12116416	12116862	TTRE_0000724801
232	Trichuris_trichiura_2_001	12120001	12140000	0.480716	12121861	12122237	TTRE_0000949601	Neur chan LBD domain containing protein	UniProtKB/TrEMBL	A0A077ZMU6
233	Trichuris_trichiura_2_001	12120001	12140000	0.480716	12128712	12130779	TTRE_0000897201	GABA receptor subunit	UniProtKB/TrEMBL	A0A077ZLJ2
234	Trichuris_trichiura_2_001	12140001	12160000	0.395372	12140369	12143164	TTRE_0000863001	Neur chan memb domain containing protein	UniProtKB/TrEMBL	A0A077ZIQ1
235	Trichuris_trichiura_2_001	12900001	12920000	0.560434	12900141	12901932	TTRE_0000939701	Related to protein CS029, probably involved in pr e-mRNA splicing	UniProtKB/TrEMBL	A0A077ZML6
236	Trichuris_trichiura_2_001	12900001	12920000	0.560434	12902622	12903130	TTRE_0000909401
237	Trichuris_trichiura_2_001	13120001	13140000	0.382286	13121541	13122407	TTRE_0000706701	Ubiquitin conjugating enzyme E2 J1	UniProtKB/TrEMBL	A0A077ZEE5
238	Trichuris_trichiura_2_001	13380001	13400000	0.386513	13391269	13400000	TTRE_0000600201	Zf-C4 and Hormone recep domain containing protein	UniProtKB/TrEMBL	A0A077ZCZ9
239	Trichuris_trichiura_2_001	13400001	13420000	0.368041	13400002	13403345	TTRE_0000600201	Zf-C4 and Hormone recep domain containing protein	UniProtKB/TrEMBL	A0A077ZCZ9
240	Trichuris_trichiura_2_001	13380001	13400000	0.386513	13399620	13399955	TTRE_0000600301
241	Trichuris_trichiura_2_001	13400001	13420000	0.368041	13410004	13412017	TTRE_0000600101	Fanconi anemia group M protein	UniProtKB/TrEMBL	A0A077ZDX5
242	Trichuris_trichiura_2_001	13440001	13460000	0.401755	13450470	13454523	TTRE_0000786901	Helicase C and ResIII domain containing protein	UniProtKB/TrEMBL	A0A077ZIV2
243	Trichuris_trichiura_2_001	13740001	13760000	0.359532	13741774	13742219	TTRE_0000942801
244	Trichuris_trichiura_2_001	13740001	13760000	0.359532	13749054	13750140	TTRE_0000768301	Reverse transcriptase domain-containing protein	UniProtKB/TrEMBL	A0A077ZG76
245	Trichuris_trichiura_2_001	14180001	14200000	0.383874	14183722	14185400	TTRE_0000784501
246	Trichuris_trichiura_2_001	14180001	14200000	0.383874	14190613	14192568	TTRE_0000784601
247	Trichuris_trichiura_2_001	14200001	14220000	0.358305	14215532	14216616	TTRE_0000934801
248	Trichuris_trichiura_2_001	14200001	14220000	0.358305	14216966	14217445	TTRE_0000934701	Reverse transcriptase	UniProtKB/TrEMBL	A0A077ZQA2
249	Trichuris_trichiura_2_001	14200001	14220000	0.358305	14218040	14218660	TTRE_0000935701
250	Trichuris_trichiura_2_001	14280001	14300000	0.449227	14280002	14280356	TTRE_0000940801
251	Trichuris_trichiura_2_001	14280001	14300000	0.449227	14287235	14287648	TTRE_0000941301
252	Trichuris_trichiura_2_001	14280001	14300000	0.449227	14288312	14289230	TTRE_0000891601
253	Trichuris_trichiura_2_001	14280001	14300000	0.449227	14289580	14290041	TTRE_0000939201
254	Trichuris_trichiura_2_001	14380001	14400000	0.377182	14382188	14383196	TTRE_0000965201
255	Trichuris_trichiura_2_001	16340001	16360000	0.379114	16358933	16360000	TTRE_0000729201	EB domain containing protein	UniProtKB/TrEMBL	A0A077ZH16
256	Trichuris_trichiura_2_001	16360001	16380000	0.408463	16360002	16364774	TTRE_0000729201	EB domain containing protein	UniProtKB/TrEMBL	A0A077ZH16
257	Trichuris_trichiura_2_001	16380001	16400000	0.398527	16389411	16390375	TTRE_0000804001	Zona pellucida domain containing protein	UniProtKB/TrEMBL	A0A077ZH87
258	Trichuris_trichiura_2_001	16380001	16400000	0.398527	16391526	16391918	TTRE_0000803901
259	Trichuris_trichiura_2_001	16400001	16420000	0.421371	16400002	16404935	TTRE_0000662401	Protein CBG07648	UniProtKB/TrEMBL	A0A077ZD81
260	Trichuris_trichiura_2_001	16380001	16400000	0.398527	16395042	16400000	TTRE_0000662401	Protein CBG07648	UniProtKB/TrEMBL	A0A077ZD81
261	Trichuris_trichiura_2_001	16400001	16420000	0.421371	16402394	16414310	TTRE_0000662501	UDP-glucuronosyltransferase	UniProtKB/TrEMBL	A0A077ZFK0
262	Trichuris_trichiura_2_001	19080001	19100000	0.517456	19094172	19095241	TTRE_0000644801	Tfb4 domain containing protein	UniProtKB/TrEMBL	A0A077ZEA5
263	Trichuris_trichiura_2_001	19340001	19360000	0.350396	19341236	19343152	TTRE_0000766101	Peptidase C48 domain containing protein	UniProtKB/TrEMBL	A0A077ZHP5
264	Trichuris_trichiura_2_001	19340001	19360000	0.350396	19350122	19351227	TTRE_0000752701	Drf DAD and FH2 domain containing protein	UniProtKB/TrEMBL	A0A077ZFP4
265	Trichuris_trichiura_2_001	19460001	19480000	0.407082	19462340	19462690	TTRE_0000692301	Protein FAM32a	UniProtKB/TrEMBL	A0A077ZJ35
266	Trichuris_trichiura_2_001	19460001	19480000	0.407082	19463103	19464034	TTRE_0000692401	Cyclin N domain containing protein	UniProtKB/TrEMBL	A0A077ZE16
267	Trichuris_trichiura_2_001	19460001	19480000	0.407082	19468317	19470076	TTRE_0000692501	Tau tubulin kinase 1	UniProtKB/TrEMBL	A0A077ZE01
268	Trichuris_trichiura_2_001	19500001	19520000	0.526966	19516627	19517062	TTRE_0000592301
269	Trichuris_trichiura_2_001	19500001	19520000	0.526966	19518434	19520000	TTRE_0000592401	TWiK family of potassium channels protein 7	UniProtKB/TrEMBL	A0A077ZBB5
270	Trichuris_trichiura_2_001	19520001	19540000	0.370341	19520002	19522173	TTRE_0000592401	TWiK family of potassium channels protein 7	UniProtKB/TrEMBL	A0A077ZBB5
271	Trichuris_trichiura_2_001	19520001	19540000	0.370341	19535702	19537269	TTRE_0000801501	Kunitz BPTI domain containing protein	UniProtKB/TrEMBL	A0A077ZH70
272	Trichuris_trichiura_2_001	19520001	19540000	0.370341	19538035	19538424	TTRE_0000801401
273	Trichuris_trichiura_2_001	19540001	19560000	0.362722	19541940	19543645	TTRE_0000801301	Protein LTV1	UniProtKB/TrEMBL	A0A077ZM33
274	Trichuris_trichiura_2_001	19540001	19560000	0.362722	19547004	19548671	TTRE_0000801201	Aspartyl aminopeptidase	UniProtKB/TrEMBL	A0A077ZIW8
275	Trichuris_trichiura_2_001	19540001	19560000	0.362722	19549415	19552479	TTRE_0000803601	Polymerase delta interacting protein 2	UniProtKB/TrEMBL	A0A077ZJ90
276	Trichuris_trichiura_2_001	19540001	19560000	0.362722	19556541	19558976	TTRE_0000803501	GA22017, isoform D	UniProtKB/TrEMBL	A0A077ZH83
277	Trichuris_trichiura_2_001	21220001	21240000	0.414228	21225964	21226164	TTRE_0000898601	Histone domain containing protein	UniProtKB/TrEMBL	A0A077ZJP3
278	Trichuris_trichiura_2_001	21240001	21260000	0.479103	21258183	21258593	TTRE_0000963801	Histone H3	UniProtKB/TrEMBL	A0A077ZQW1
279	Trichuris_trichiura_2_001	21260001	21280000	0.355665	21265108	21266649	TTRE_0000900601	WD40 domain containing protein	UniProtKB/TrEMBL	A0A077ZJP6
280	Trichuris_trichiura_2_001	21260001	21280000	0.355665	21273213	21273623	TTRE_0000819001	Histone H3	UniProtKB/TrEMBL	A0A077ZJD6
281	Trichuris_trichiura_2_001	21860001	21880000	0.385257	21864786	21865121	TTRE_0000932401
282	Trichuris_trichiura_2_001	21860001	21880000	0.385257	21868773	21869185	TTRE_0000842301	BEL12 AG transposon polyprotein	UniProtKB/TrEMBL	A0A077ZI44
283	Trichuris_trichiura_2_001	21860001	21880000	0.385257	21877639	21877842	TTRE_0000828901
284	Trichuris_trichiura_2_001	24700001	24720000	0.47187	24701260	24703743	TTRE_0000269701
285	Trichuris_trichiura_3_001	4200001	4220000	0.36667	4201389	4206494	TTRE_0000541301	Metal transporter CNNM2	UniProtKB/TrEMBL	A0A077ZA63
286	Trichuris_trichiura_3_001	4200001	4220000	0.36667	4210360	4211248	TTRE_0000796501	MEC 3	UniProtKB/TrEMBL	A0A077ZH44
287	Trichuris_trichiura_3_001	4200001	4220000	0.36667	4212994	4213626	TTRE_0000796601
288	Trichuris_trichiura_3_001	4200001	4220000	0.36667	4217850	4220000	TTRE_0000796701	U3 small nucleolar rna associated protein 15	UniProtKB/TrEMBL	A0A077ZIR2
289	Trichuris_trichiura_3_001	4220001	4240000	0.461763	4220002	4221685	TTRE_0000796701	U3 small nucleolar rna associated protein 15	UniProtKB/TrEMBL	A0A077ZIR2
290	Trichuris_trichiura_3_001	4220001	4240000	0.461763	4222014	4223236	TTRE_0000796801	Tetraspanin	UniProtKB/TrEMBL	A0A077ZLZ4
291	Trichuris_trichiura_3_001	4220001	4240000	0.461763	4227655	4228753	TTRE_0000934901	Deoxyribonuclease (DNase) II	UniProtKB/TrEMBL	A0A077ZKQ3
292	Trichuris_trichiura_3_001	6940001	6960000	0.394995	6944854	6945174	TTRE_0000786401
293	Trichuris_trichiura_3_001	6940001	6960000	0.394995	6950209	6950673	TTRE_0000928001
294	Trichuris_trichiura_3_001	6940001	6960000	0.394995	6950268	6950513	TTRE_0000362901
295	Trichuris_trichiura_3_001	6940001	6960000	0.394995	6956603	6957016	TTRE_0000363001
296	Trichuris_trichiura_3_001	6960001	6980000	0.362774	6960614	6964368	TTRE_0000786101
297	Trichuris_trichiura_3_001	6960001	6980000	0.362774	6960673	6960963	TTRE_0000363101
298	Trichuris_trichiura_3_001	6960001	6980000	0.362774	6963939	6964256	TTRE_0000363201
299	Trichuris_trichiura_3_001	6960001	6980000	0.362774	6968879	6969854	TTRE_0000786001	WD40 domain containing protein	UniProtKB/TrEMBL	A0A077ZI95
300	Trichuris_trichiura_3_001	6960001	6980000	0.362774	6971452	6971897	TTRE_0000119101	Probable 28S ribosomal protein S16, mitochondrial	UniProtKB/TrEMBL	A0A077YYU7
301	Trichuris_trichiura_3_001	6960001	6980000	0.362774	6973006	6976091	TTRE_0000119001	Beta arrestin 1	UniProtKB/TrEMBL	A0A077YZN5
302	Trichuris_trichiura_3_001	6960001	6980000	0.362774	6976722	6980000	TTRE_0000118901	Myb DNA-binding domain containing protein	UniProtKB/TrEMBL	A0A077YXU2
303	Trichuris_trichiura_3_001	7040001	7060000	0.538633	7040002	7046323	TTRE_0000117901	AMP deaminase	UniProtKB/TrEMBL	A0A077YXT3
304	Trichuris_trichiura_3_001	7040001	7060000	0.538633	7046447	7047697	TTRE_0000117801
305	Trichuris_trichiura_3_001	7040001	7060000	0.538633	7047852	7048328	TTRE_0000117701	SYS1 domain containing protein	UniProtKB/TrEMBL	A0A077Z2I9
306	Trichuris_trichiura_3_001	7040001	7060000	0.538633	7050799	7053134	TTRE_0000117601
307	Trichuris_trichiura_3_001	7040001	7060000	0.538633	7054417	7054990	TTRE_0000117501
308	Trichuris_trichiura_3_001	7060001	7080000	0.495207	7067186	7068046	TTRE_0000117401	Methyltransferase protein 9	UniProtKB/TrEMBL	A0A077YXS9
309	Trichuris_trichiura_3_001	7060001	7080000	0.495207	7070102	7077395	TTRE_0000117301	Lysine specific histone demethylase 1B	UniProtKB/TrEMBL	A0A077YYL2
310	Trichuris_trichiura_3_002	2120001	2140000	0.35068	2125608	2127522	TTRE_0000415801	Ion trans and BTB 2 domain containing protein	UniProtKB/TrEMBL	A0A077Z7Y8
311	Trichuris_trichiura_3_002	2120001	2140000	0.35068	2127723	2130161	TTRE_0000415901	WAP domain containing protein, SLPI-like	UniProtKB/TrEMBL	A0A077ZB55
312	Trichuris_trichiura_3_002	2120001	2140000	0.35068	2127737	2128039	TTRE_0000416001
313	Trichuris_trichiura_3_002	4160001	4180000	0.370832	4162072	4164086	TTRE_0000701101	Protein transport protein Sec61 subunit alpha	UniProtKB/TrEMBL	A0A077ZEC0
314	Trichuris_trichiura_3_002	4160001	4180000	0.370832	4164289	4174135	TTRE_0000701201	PL48 domain-containing protein	UniProtKB/TrEMBL	A0A077ZE91
315	Trichuris_trichiura_3_002	5040001	5060000	0.407866	5044909	5045529	TTRE_0000815901	Retrovirus pol polyprotein	UniProtKB/TrEMBL	A0A077ZJI2
316	Trichuris_trichiura_3_002	5040001	5060000	0.407866	5048473	5048919	TTRE_0000818401
317	Trichuris_trichiura_3_002	5060001	5080000	0.443011	5065773	5066093	TTRE_0000821101	Scavenger receptor class B member	UniProtKB/TrEMBL	A0A077ZJM8
318	Trichuris_trichiura_3_002	5060001	5080000	0.443011	5068331	5069499	TTRE_0000821201	His Phos 1 domain containing protein	UniProtKB/TrEMBL	A0A077ZJA4
319	Trichuris_trichiura_3_002	5060001	5080000	0.443011	5072930	5073286	TTRE_0000821301	Putative zinc finger protein	UniProtKB/TrEMBL	A0A077ZMH1
320	Trichuris_trichiura_3_002	5420001	5440000	0.357095	5437786	5439104	TTRE_0000601801
321	Trichuris_trichiura_3_003	1	20000	0.362875	4492	8599	TTRE_0000721801	DUF221 domain containing protein	UniProtKB/TrEMBL	A0A077ZER8
322	Trichuris_trichiura_3_003	1560001	1580000	0.447214	1564373	1567345	TTRE_0000190501	Isovaleryl coenzyme A dehydrogenase	UniProtKB/TrEMBL	A0A077Z4N9
323	Trichuris_trichiura_3_003	1560001	1580000	0.447214	1568309	1569001	TTRE_0000190401	NUDIX domain containing protein	UniProtKB/TrEMBL	A0A077Z122
324	Trichuris_trichiura_3_003	1560001	1580000	0.447214	1571757	1573972	TTRE_0000931301	Putative cytochrome b5	UniProtKB/TrEMBL	A0A077ZMC9
325	Trichuris_trichiura_3_003	1580001	1600000	0.591154	1595299	1595498	TTRE_0000707701	DUF5641 domain-containing protein	UniProtKB/TrEMBL	A0A077ZEF3
326	Trichuris_trichiura_3_003	1720001	1740000	0.391687	1720277	1722250	TTRE_0000483401	Homeobox domain containing protein	UniProtKB/TrEMBL	A0A077Z9V0
327	Trichuris_trichiura_3_003	1720001	1740000	0.391687	1722913	1723870	TTRE_0000483501	FERM M domain containing protein	UniProtKB/TrEMBL	A0A077ZD79
328	Trichuris_trichiura_3_003	1720001	1740000	0.391687	1723253	1723708	TTRE_0000483601
329	Trichuris_trichiura_3_003	1720001	1740000	0.391687	1726200	1726921	TTRE_0000497901
330	Trichuris_trichiura_3_003	1720001	1740000	0.391687	1728670	1729405	TTRE_0000498001	CAP GLY domain containing protein	UniProtKB/TrEMBL	A0A077ZAS9
331	Trichuris_trichiura_3_003	1720001	1740000	0.391687	1729428	1730457	TTRE_0000498101	DUF2052 domain containing protein	UniProtKB/TrEMBL	A0A077ZA95
332	Trichuris_trichiura_3_003	1720001	1740000	0.391687	1731348	1732540	TTRE_0000498201	Peptidase family m28 containing protein	UniProtKB/TrEMBL	A0A077ZDI6
333	Trichuris_trichiura_3_003	1720001	1740000	0.391687	1733609	1734814	TTRE_0000498301
334	Trichuris_trichiura_3_003	1720001	1740000	0.391687	1735283	1737251	TTRE_0000498401	CAP domain containing protein	UniProtKB/TrEMBL	A0A077Z8D7
335	Trichuris_trichiura_3_003	1840001	1860000	0.383945	1840064	1842368	TTRE_0000896401	DUF229 domain containing protein	UniProtKB/TrEMBL	A0A077ZJJ8
336	Trichuris_trichiura_3_003	1840001	1860000	0.383945	1855358	1856765	TTRE_0000484901
337	Trichuris_trichiura_3_003	2440001	2460000	0.39204	2440002	2441177	TTRE_0000796201	Guanine nucleotide-binding protein subunit gamma	UniProtKB/TrEMBL	A0A077ZIN0
338	Trichuris_trichiura_3_003	2440001	2460000	0.39204	2450067	2455164	TTRE_0000232101
339	Trichuris_trichiura_3_003	2440001	2460000	0.39204	2458977	2460000	TTRE_0000232201
